# Supplementary material for: Organocatalytic asymmetric biomimetic transamination of α-keto acetals to chiral α-amino acetals
Source: Royal Society of Chemistry journal article supplement (doi:10.1039/c3ra42906g), 2013-11-11

# Organocatalytic asymmetric biomimetic transamination of $\alpha$ -keto acetal to chiral $\alpha$ -amino acetal

Hongjie Pan,<sup>a</sup> Ying Xie,<sup>a</sup> Mao Liu,<sup>a</sup> and Yian Shi<sup>\*a,b</sup>

<sup>a</sup> *Beijing National Laboratory for Molecular Sciences, CAS Key Laboratory of Molecular Recognition and Function, Institute of Chemistry, Chinese Academy of Sciences, Beijing 100190, China.*

<sup>b</sup> *Department of Chemistry, Colorado State University, Fort Collins, Colorado 80523, USA*

## Supporting Information

### Table of Contents

|                                                      |      |
|------------------------------------------------------|------|
| General methods                                      | S-2  |
| Experimental procedures and characterization data    | S-2  |
| HPLC data for determination of enantiomeric excesses | S-15 |
| NMR spectra                                          | S-24 |

**General Methods.** All commercially available reagents were used without further purification. Toluene and benzene were distilled from sodium-benzophenone. Dichloromethane and 1,2-dichloroethane were distilled from CaH<sub>2</sub>. Dimethyl sulfoxide was dried over 4 Å molecular sieves (activated at 180 °C under vacuum over 8 h). Column chromatography was performed on silica gel (200-300 mesh). <sup>1</sup>H NMR spectra were recorded on a 400 MHz NMR spectrometer and <sup>13</sup>C NMR spectra were recorded on a 100 MHz NMR spectrometer. IR spectra were recorded on a FT-IR spectrometer. *o*-HOPhCH<sub>2</sub>NH<sub>2</sub> was prepared from 2-methoxybenzylamine through demethylation using BBr<sub>3</sub>.<sup>1</sup> Catalysts **C1-C5** were prepared according to the reported procedure.<sup>2</sup> Ketones **4a**, **4b**, and **4e-4q** were prepared by addition of the corresponding Grignard reagents to ethyl dimethoxyacetate or ethyl diethoxyacetate.<sup>3</sup> Ketones **4c** and **4d** were prepared from ketone **4a** via acid-catalyzed acetal exchange according to the reported procedure.<sup>4</sup>

- (1) A. J. Hallett, G. J. Kwant and J. G. Vries, *Chem.-Eur. J.*, 2009, **15**, 2111.  
(2) (a) X. Xiao, Y. Xie, C. Su, M. Liu and Y. Shi, *J. Am. Chem. Soc.*, 2011, **133**, 12914; (b) Y. Xie, H. Pan, X. Xiao, S. Li and Y. Shi, *Org. Biomol. Chem.*, 2012, **10**, 8960.  
(3) M. Adamczyk, D. D. Johnson, P. G. Mattingly, Y. Pan and R. E. Reddy, *Synth. Commun.*, 2002, **32**, 3199.  
(4) S.-K. Tian, R. Hong and L. Deng, *J. Am. Chem. Soc.*, 2003, **125**, 9900.

**Representative procedure for transamination of  $\alpha$ -keto acetals (Table 2, entry 1).**

To a Schlenk tube was added  $\alpha$ -keto acetal **4a** (0.101 g, 0.50 mmol), *o*-HOPhCH<sub>2</sub>NH<sub>2</sub> (0.092 g, 0.75 mmol), catalyst **C5** (0.038 g, 0.10 mmol), and toluene (2.5 mL). Upon stirring at 110 °C for 72 h, the reaction mixture was cooled to room temperature, concentrated, and purified by flash column chromatography (silica gel, eluent: PE/EtOAc = 30/1) to remove *o*-HOPhCH<sub>2</sub>NH<sub>2</sub>, catalyst, and other byproducts. The resulting aldimine was dissolved in THF (1.0 mL) and 1 N HCl (2.0 mL). Upon stirring at 20 °C for 24 h, the reaction mixture was diluted with water (20 mL), washed with hexanes (15 mL x 3), concentrated to remove THF, brought to pH > 7 with solid K<sub>2</sub>CO<sub>3</sub>, extracted with CH<sub>2</sub>Cl<sub>2</sub> (30 mL x 3), dried over MgSO<sub>4</sub>, filtered, and concentrated to give  $\alpha$ -amino acetal **6a** as a yellow

oil (0.066 g, 65% yield, 85% ee).

**Preparation of *N*-benzoyl derivative of  $\alpha$ -amino acetal for the determination of the enantiomeric excess.**

To a solution of  $\alpha$ -amino acetal **6a** (0.020 g, 0.10 mmol) in CH<sub>2</sub>Cl<sub>2</sub> (1.0 mL) was added Et<sub>3</sub>N (0.018 g, 0.18 mmol) and PhCOCl (0.018 g, 0.15 mmol). Upon stirring at room temperature for 30 min, the reaction mixture was purified by flash column chromatography (silica gel, eluent: PE/EtOAc = 8/1) to give *N*-benzoyl amine **10a** as a white solid (0.027 g, 88%). The sample was subjected to chiral HPLC (Chiralpak AD-H column) to determine the enantiomeric excess.

**Table 1, entry 10**

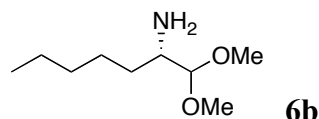

Yellow oil;  $[\alpha]_D^{20} = -11.4$  (*c* 0.35, CHCl<sub>3</sub>) (82% ee); IR (film) 3379, 2954, 1116, 1061 cm<sup>-1</sup>; <sup>1</sup>H NMR (400 MHz, CDCl<sub>3</sub>)  $\delta$  3.99 (d, *J* = 4.8 Hz, 1H), 3.39 (s, 3H), 3.37 (s, 3H), 2.84-2.74 (m, 1H), 1.58-1.48 (m, 1H), 1.47-1.35 (m, 2H), 1.33-1.16 (m, 7H), 0.85 (t, *J* = 6.4 Hz, 3H); <sup>13</sup>C NMR (100 MHz, CDCl<sub>3</sub>)  $\delta$  108.5, 55.2, 55.0, 52.8, 32.4, 32.1, 25.9, 22.8, 14.2; HRMS Calcd for C<sub>9</sub>H<sub>22</sub>NO<sub>2</sub> (M+H): 176.1645; Found: 176.1642.

**Table 1, entry 11**

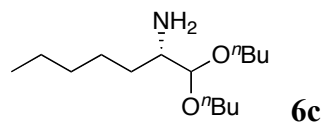

Yellow oil;  $[\alpha]_D^{20} = -6.4$  (*c* 0.39, CHCl<sub>3</sub>) (76% ee); IR (film) 3384, 2957, 1115, 1071 cm<sup>-1</sup>; <sup>1</sup>H NMR (400 MHz, CDCl<sub>3</sub>)  $\delta$  4.22-4.06 (m, 1H), 3.72-3.56 (m, 2H), 3.52-3.38 (m, 2H), 2.91-2.72 (m, 1H), 1.61-1.50 (m, 6H), 1.44-1.33 (m, 6H), 1.33-1.20 (m, 6H), 0.95-0.84 (m, 9H); <sup>13</sup>C NMR (100 MHz, CDCl<sub>3</sub>)  $\delta$  106.0, 67.9, 67.6, 53.6, 32.19, 32.17, 32.14, 32.0, 25.9, 22.8, 19.57, 19.56, 14.3, 14.1; HRMS Calcd for C<sub>15</sub>H<sub>34</sub>NO<sub>2</sub> (M+H): 260.2584; Found: 260.2584.

**Table 1, entry 12**

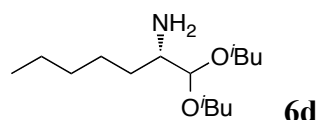

Yellow oil;  $[\alpha]_D^{20} = -4.8$  (*c* 0.31, CHCl<sub>3</sub>) (77% ee); IR (film) 3379, 2956, 1469, 1117, 1058 cm<sup>-1</sup>; <sup>1</sup>H NMR (400 MHz, CDCl<sub>3</sub>)  $\delta$  4.10 (d, *J* = 5.2 Hz, 1H), 3.43 (dd, *J* = 8.8, 6.4 Hz, 1H), 3.36 (dd, *J* = 8.8, 6.4 Hz, 1H), 3.22-3.13 (m, 2H), 2.83-2.75 (m, 1H), 1.89-1.76 (m, 2H), 1.59-1.49 (m, 1H), 1.49-1.36 (m, 3H), 1.36-1.17 (m, 6H), 0.92-0.83 (m, 15H); <sup>13</sup>C NMR (100 MHz, CDCl<sub>3</sub>)  $\delta$  106.7, 74.6, 74.4, 53.4, 32.4, 32.2, 28.91, 28.89, 26.0, 22.8, 19.64, 19.61, 14.2; HRMS Calcd for C<sub>15</sub>H<sub>33</sub>NNaO<sub>2</sub> (M+Na): 282.2404; Found: 282.2406.

**Table 2, entry 1**

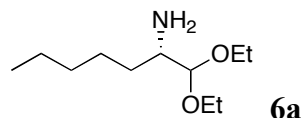

Yellow oil;  $[\alpha]_D^{20} = -7.6$  (*c* 1.01, CHCl<sub>3</sub>) (85% ee); IR (film) 3379, 1118, 1063 cm<sup>-1</sup>; <sup>1</sup>H NMR (400 MHz, CDCl<sub>3</sub>)  $\delta$  4.15 (d, *J* = 5.6 Hz, 1H), 3.77-3.60 (m, 2H), 3.56-3.46 (m, 2H), 2.81-2.72 (m, 1H), 1.78-1.60 (m, 2H), 1.59-1.49 (m, 1H), 1.49-1.38 (m, 1H), 1.34-1.22 (m, 6H), 1.22-1.15 (m, 6H), 0.86 (t, *J* = 6.8 Hz, 3H); <sup>13</sup>C NMR (100 MHz, CDCl<sub>3</sub>)  $\delta$  106.5, 63.5, 63.2, 53.7, 32.4, 32.2, 26.0, 22.8, 15.6, 14.2; HRMS Calcd for C<sub>11</sub>H<sub>25</sub>NNaO<sub>2</sub> (M+Na): 226.1778; Found: 226.1775.

**Table 2, entry 2**

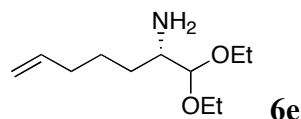

Yellow oil;  $[\alpha]_D^{20} = -6.7$  (*c* 1.22, CHCl<sub>3</sub>) (84% ee); IR (film) 3379, 2976, 1594, 1117, 1063 cm<sup>-1</sup>; <sup>1</sup>H NMR (400 MHz, CDCl<sub>3</sub>)  $\delta$  5.85-5.72 (m, 1H), 4.98 (d, *J* = 17.2 Hz, 1H), 4.92 (d, *J* = 10.0 Hz, 1H), 4.14 (d, *J* = 4.8 Hz, 1H), 3.77-3.60 (m, 2H), 3.56-3.46 (m, 2H), 2.82-2.73 (m, 1H), 2.13-1.97 (m, 2H), 1.63-1.50 (m, 2H), 1.50-1.32 (m, 3H), 1.31-1.24 (m, 1H), 1.24-1.15 (m, 6H); <sup>13</sup>C NMR (100 MHz, CDCl<sub>3</sub>)  $\delta$  138.9, 114.7, 106.5, 63.5, 63.2, 53.5, 34.0, 32.0, 25.7, 15.6; HRMS Calcd for C<sub>11</sub>H<sub>23</sub>NNaO<sub>2</sub> (M+Na): 224.1621; Found: 224.1618.



**Table 2, entry 3**

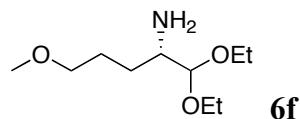

Yellow oil;  $[\alpha]_D^{20} = -5.0$  (*c* 1.03, CHCl<sub>3</sub>) (83% ee); IR (film) 3379, 2975, 1118, 1062 cm<sup>-1</sup>; <sup>1</sup>H NMR (400 MHz, CDCl<sub>3</sub>)  $\delta$  4.17 (d, *J* = 5.2 Hz, 1H), 3.77-3.63 (m, 2H), 3.57-3.47 (m, 2H), 3.39 (t, *J* = 6.4 Hz, 2H), 3.32 (s, 3H), 2.83-2.75 (m, 1H), 1.82-1.70 (m, 1H), 1.70-1.47 (m, 4H), 1.34-1.24 (m, 1H), 1.24-1.18 (m, 6H); <sup>13</sup>C NMR (100 MHz, CDCl<sub>3</sub>)  $\delta$  106.5, 73.1, 63.6, 63.3, 58.7, 53.6, 29.1, 26.5, 15.6; HRMS Calcd for C<sub>10</sub>H<sub>23</sub>NNaO<sub>3</sub> (M+Na): 228.1570; Found: 228.1569.

**Table 2, entry 4**

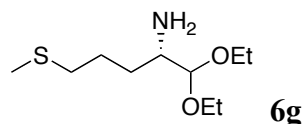

Yellow oil;  $[\alpha]_D^{20} = -8.9$  (*c* 1.00, CHCl<sub>3</sub>) (84% ee); IR (film) 3370, 2974, 1118, 1061 cm<sup>-1</sup>; <sup>1</sup>H NMR (400 MHz, CDCl<sub>3</sub>)  $\delta$  4.16 (d, *J* = 4.8 Hz, 1H), 3.78-3.64 (m, 2H), 3.57-3.47 (m, 2H), 2.84-2.75 (m, 1H), 2.57-2.43 (m, 2H), 2.09 (s, 3H), 1.86-1.73 (m, 1H), 1.72-1.57 (m, 2H), 1.47-1.28 (m, 3H), 1.25-1.18 (m, 6H); <sup>13</sup>C NMR (100 MHz, CDCl<sub>3</sub>)  $\delta$  106.5, 63.6, 63.4, 53.5, 34.5, 31.7, 26.1, 15.7, 15.6; HRMS Calcd for C<sub>10</sub>H<sub>24</sub>NO<sub>2</sub>S (M+H): 222.1522; Found: 222.1518.

**Table 2, entry 5**

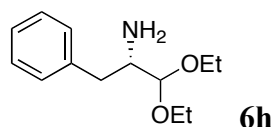

Yellow oil;  $[\alpha]_D^{20} = -14.7$  (*c* 0.98, CHCl<sub>3</sub>) (83% ee); IR (film) 3376, 2975, 1495, 1454, 1118, 1061 cm<sup>-1</sup>; <sup>1</sup>H NMR (400 MHz, CDCl<sub>3</sub>)  $\delta$  7.33-7.27 (m, 2H), 7.25-7.18 (m, 3H), 4.25 (d, *J* = 5.2 Hz, 1H), 3.83-3.68 (m, 2H), 3.63-3.51 (m, 2H), 3.17-3.05 (m, 1H), 2.99 (dd, *J* = 13.2, 3.2 Hz, 1H), 2.52 (dd, *J* = 13.2, 9.6 Hz, 1H), 1.69-1.46 (m, 2H), 1.28-1.20 (m, 6H); <sup>13</sup>C NMR (100 MHz, CDCl<sub>3</sub>)  $\delta$  139.3, 129.5, 128.7, 126.5, 105.8, 63.8, 63.5, 55.1, 38.8, 15.6;

HRMS Calcd for C<sub>13</sub>H<sub>22</sub>NO<sub>2</sub> (M+H): 224.1645; Found: 224.1646.

**Table 2, entry 6**

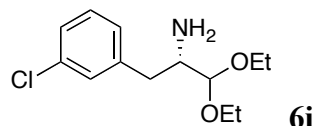

Yellow oil;  $[\alpha]_D^{20} = -13.9$  (*c* 0.95, CHCl<sub>3</sub>) (82% ee); IR (film) 3383, 2975, 1597, 1573, 1477, 1118, 1061 cm<sup>-1</sup>; <sup>1</sup>H NMR (400 MHz, CDCl<sub>3</sub>)  $\delta$  7.25-7.16 (m, 3H), 7.13-7.08 (m, 1H), 4.23 (d, *J* = 4.4 Hz, 1H), 3.81-3.67 (m, 2H), 3.62-3.50 (m, 2H), 3.13-3.04 (m, 1H), 3.00-2.92 (m, 1H), 2.54-2.43 (m, 1H), 1.50-1.30 (m, 2H), 1.28-1.20 (m, 6H); <sup>13</sup>C NMR (100 MHz, CDCl<sub>3</sub>)  $\delta$  141.6, 134.4, 129.9, 129.6, 127.7, 126.6, 105.8, 63.7, 63.5, 54.9, 38.6, 15.6; HRMS Calcd for C<sub>13</sub>H<sub>21</sub>ClNO<sub>2</sub> (M+H): 258.1255; Found: 258.1257.

**Table 2, entry 7**

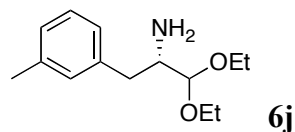

Yellow oil;  $[\alpha]_D^{20} = -16.5$  (*c* 1.00, CHCl<sub>3</sub>) (84% ee); IR (film) 3383, 2974, 1608, 1444, 1118, 1062 cm<sup>-1</sup>; <sup>1</sup>H NMR (400 MHz, CDCl<sub>3</sub>)  $\delta$  7.22-7.15 (m, 1H), 7.08-6.98 (m, 3H), 4.25 (d, *J* = 5.2 Hz, 1H), 3.83-3.68 (m, 2H), 3.63-3.51 (m, 2H), 3.15-3.05 (m, 1H), 3.02-2.90 (m, 1H), 2.46 (dd, *J* = 12.4, 9.6 Hz, 1H), 2.33 (s, 3H), 1.46-1.33 (m, 2H), 1.29-1.20 (m, 6H); <sup>13</sup>C NMR (100 MHz, CDCl<sub>3</sub>)  $\delta$  139.2, 138.2, 130.3, 128.5, 127.2, 126.5, 106.0, 63.7, 63.4, 55.00, 38.8, 21.6, 15.6; HRMS Calcd for C<sub>14</sub>H<sub>24</sub>NO<sub>2</sub> (M+H): 238.1802; Found: 238.1803.

**Table 2, entry 8**

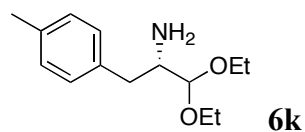

Yellow oil;  $[\alpha]_D^{20} = -16.0$  (*c* 1.02, CHCl<sub>3</sub>) (86% ee); IR (film) 3379, 2975, 1515, 1444, 1110, 1062 cm<sup>-1</sup>; <sup>1</sup>H NMR (400 MHz, CDCl<sub>3</sub>)  $\delta$  7.13-7.03 (m, 4H), 4.23 (d, *J* = 5.2 Hz, 1H),

3.82-3.67 (m, 2H), 3.62-3.51 (m, 2H), 3.13-3.03 (m, 1H), 2.99-2.90 (m, 1H), 2.47 (dd,  $J = 13.2, 9.6$  Hz, 1H), 2.31 (s, 3H), 1.43-1.29 (m, 2H), 1.27-1.20 (m, 6H);  $^{13}\text{C}$  NMR (100 MHz,  $\text{CDCl}_3$ )  $\delta$  136.2, 135.8, 129.3, 106.0, 63.7, 63.3, 55.0, 38.4, 21.2, 15.6; HRMS Calcd for  $\text{C}_{14}\text{H}_{23}\text{NNaO}_2$  ( $\text{M}+\text{Na}$ ): 260.1621; Found: 260.1618.

**Table 2, entry 9**

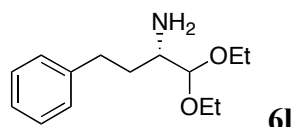

Yellow oil;  $[\alpha]_{\text{D}}^{20} = -12.2$  ( $c$  0.98,  $\text{CHCl}_3$ ) (84% ee); IR (film) 3379, 2975, 1496, 1455, 1116, 1062  $\text{cm}^{-1}$ ;  $^1\text{H}$  NMR (400 MHz,  $\text{CDCl}_3$ )  $\delta$  7.31-7.24 (m, 2H), 7.24-7.14 (m, 3H), 4.19 (d,  $J = 4.4$  Hz, 1H), 3.79-3.60 (m, 2H), 3.58-3.45 (m, 2H), 2.90-2.78 (m, 2H), 2.71-2.60 (m, 1H), 1.96-1.85 (m, 1H), 1.66-1.40 (m, 3H), 1.26-1.16 (m, 6H);  $^{13}\text{C}$  NMR (100 MHz,  $\text{CDCl}_3$ )  $\delta$  142.4, 128.6, 128.5, 125.9, 106.4, 63.5, 63.2, 53.2, 34.3, 32.7, 15.5; HRMS Calcd for  $\text{C}_{14}\text{H}_{23}\text{NNaO}_2$  ( $\text{M}+\text{Na}$ ): 260.1621; Found: 260.1619.

**Table 2, entry 10**

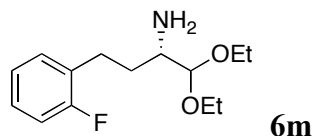

Yellow oil;  $[\alpha]_{\text{D}}^{20} = -11.2$  ( $c$  1.14,  $\text{CHCl}_3$ ) (84% ee); IR (film) 3376, 2975, 1492, 1456, 1114, 1061  $\text{cm}^{-1}$ ;  $^1\text{H}$  NMR (400 MHz,  $\text{CDCl}_3$ )  $\delta$  7.24-7.18 (m, 1H), 7.18-7.10 (m, 1H), 7.07-6.94 (m, 2H), 4.19 (d,  $J = 4.8$  Hz, 1H), 3.78-3.59 (m, 2H), 3.56-3.45 (m, 2H), 2.89-2.76 (m, 2H), 2.76-2.64 (m, 1H), 1.94-1.82 (m, 1H), 1.62-1.50 (m, 1H), 1.50-1.37 (m, 2H), 1.23-1.16 (m, 6H);  $^{13}\text{C}$  NMR (100 MHz,  $\text{CDCl}_3$ )  $\delta$  162.5, 160.1, 130.83, 130.78, 129.3, 129.1, 127.7, 127.6, 124.13, 124.10, 115.4, 115.2, 106.4, 63.6, 63.2, 53.3, 33.0, 25.9, 25.8, 15.5; HRMS Calcd for  $\text{C}_{14}\text{H}_{23}\text{FNO}_2$  ( $\text{M}+\text{H}$ ): 256.1707; Found: 256.1708.

**Table 2, entry 11**

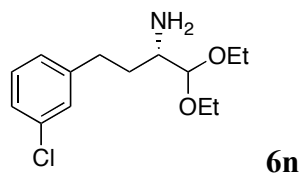

Yellow oil;  $[\alpha]_D^{20} = -12.5$  ( $c$  1.14,  $\text{CHCl}_3$ ) (83% ee); IR (film) 3376, 2975, 1597, 1573, 1477, 1116, 1061  $\text{cm}^{-1}$ ;  $^1\text{H}$  NMR (400 MHz,  $\text{CDCl}_3$ )  $\delta$  7.23-7.13 (m, 3H), 7.12-7.06 (m, 1H), 4.18 (d,  $J = 3.6$  Hz, 1H), 3.79-3.61 (m, 2H), 3.58-3.46 (m, 2H), 2.88-2.74 (m, 2H), 2.69-2.58 (m, 1H), 1.94-1.81 (m, 1H), 1.62-1.49 (m, 1H), 1.48-1.30 (m, 2H), 1.26-1.17 (m, 6H);  $^{13}\text{C}$  NMR (100 MHz,  $\text{CDCl}_3$ )  $\delta$  144.6, 134.2, 129.7, 128.7, 126.8, 126.1, 106.5, 63.6, 63.4, 53.2, 34.1, 32.4, 15.6; HRMS Calcd for  $\text{C}_{14}\text{H}_{22}\text{ClNNaO}_2$  ( $\text{M}+\text{Na}$ ): 294.1231; Found: 294.1232.

**Table 2, entry 12**

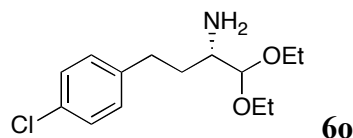

Yellow oil;  $[\alpha]_D^{20} = -11.7$  ( $c$  1.01,  $\text{CHCl}_3$ ) (85% ee); IR (film) 3376, 2975, 1492, 1115, 1061  $\text{cm}^{-1}$ ;  $^1\text{H}$  NMR (400 MHz,  $\text{CDCl}_3$ )  $\delta$  7.25-7.20 (m, 2H), 7.16-7.10 (m, 2H), 4.17 (d,  $J = 5.2$  Hz, 1H), 3.78-3.60 (m, 2H), 3.56-3.45 (m, 2H), 2.85-2.74 (m, 2H), 2.67-2.57 (m, 1H), 1.92-1.81 (m, 1H), 1.60-1.47 (m, 1H), 1.44-1.32 (m, 2H), 1.24-1.17 (m, 6H);  $^{13}\text{C}$  NMR (100 MHz,  $\text{CDCl}_3$ )  $\delta$  140.9, 131.6, 130.0, 128.6, 106.5, 63.6, 63.4, 53.2, 34.2, 32.0, 15.6; HRMS Calcd for  $\text{C}_{14}\text{H}_{22}\text{ClNNaO}_2$  ( $\text{M}+\text{Na}$ ): 294.1231; Found: 294.1233.

**Table 2, entry 13**

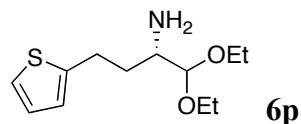

Yellow oil;  $[\alpha]_D^{20} = -15.4$  ( $c$  1.04,  $\text{CHCl}_3$ ) (82% ee); IR (film) 3376, 2974, 1443, 1373, 1116, 1062  $\text{cm}^{-1}$ ;  $^1\text{H}$  NMR (400 MHz,  $\text{CDCl}_3$ )  $\delta$  7.12-7.07 (m, 1H), 6.93-6.87 (m, 1H), 6.83-6.78 (m, 1H), 4.18 (d,  $J = 4.8$  Hz, 1H), 3.78-3.61 (m, 2H), 3.57-3.46 (m, 2H), 3.09-2.99 (m, 1H), 2.96-2.79 (m, 2H), 2.01-1.90 (m, 1H), 1.68-1.56 (m, 1H), 1.46-1.30 (m, 2H), 1.25-1.17 (m, 6H);  $^{13}\text{C}$  NMR (100 MHz,  $\text{CDCl}_3$ )  $\delta$  145.3, 126.9, 124.3, 123.1, 106.4, 63.6,

63.3, 53.0, 34.6, 26.8, 15.5; HRMS Calcd for  $C_{12}H_{21}NNaO_2S$  (M+Na): 266.1185;  
Found: 266.1185.

**Table 2, entry 14**

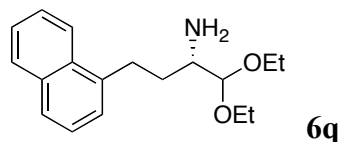

Yellow oil;  $[\alpha]_D^{20} = -18.0$  (*c* 0.91,  $CHCl_3$ ) (82% ee); IR (film) 3376, 2974, 1596, 1510, 1444, 1116, 1061  $cm^{-1}$ ;  $^1H$  NMR (400 MHz,  $CDCl_3$ )  $\delta$  8.10 (d,  $J = 8.4$  Hz, 1H), 7.84 (d,  $J = 7.6$  Hz, 1H), 7.70 (d,  $J = 7.6$  Hz, 1H), 7.55-7.44 (m, 2H), 7.43-7.34 (m, 2H), 4.21 (d,  $J = 4.8$  Hz, 1H), 3.81-3.70 (m, 1H), 3.69-3.59 (m, 1H), 3.58-3.46 (m, 2H), 3.40-3.28 (m, 1H), 3.18-3.07 (m, 1H), 3.00-2.91 (m, 1H), 2.10-1.98 (m, 1H), 1.80-1.67 (m, 1H), 1.66-1.50 (m, 2H), 1.26-1.16 (m, 6H);  $^{13}C$  NMR (100 MHz,  $CDCl_3$ )  $\delta$  138.7, 134.0, 132.0, 128.9, 126.7, 126.1, 125.9, 125.7, 125.6, 124.1, 106.4, 63.6, 63.2, 53.7, 33.8, 29.9, 15.54, 15.52; HRMS Calcd for  $C_{18}H_{25}NNaO_2$  (M+Na): 310.1778; Found: 310.1775.

## The determination of the absolute configuration of $\alpha$ -amino acetal **6h** (Scheme 2)

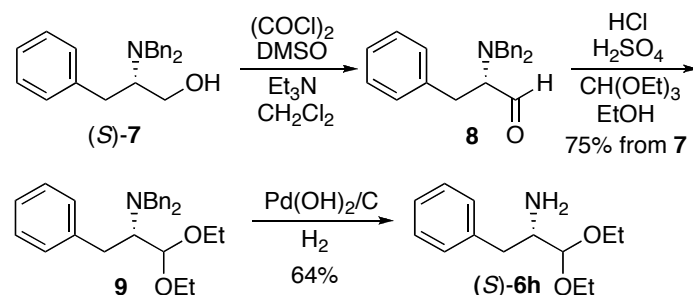

To a solution of oxalyl chloride (1.40 g, 11.0 mmol) in  $\text{CH}_2\text{Cl}_2$  (25.0 mL) was added a solution of dimethyl sulfoxide (1.72 g, 22.0 mmol) in  $\text{CH}_2\text{Cl}_2$  (5.0 mL) at  $-61^\circ\text{C}$  over 3 min under  $\text{N}_2$ . After the reaction mixture was stirred at  $-61^\circ\text{C}$  for 5 min, a solution of (*S*)-2-(*N,N*-dibenzylamino)-3-phenyl-1-propanol (**7**) (3.31 g, 10.0 mmol) in  $\text{CH}_2\text{Cl}_2$  (12.0 mL) was added over 5 min. After stirring at  $-61^\circ\text{C}$  for another 30 min, triethylamine (5.06 g, 50.0 mmol) was added. Upon stirring at  $-61^\circ\text{C}$  for 1 h, the reaction mixture was taken out from the cooling bath, stirred for 2 h, quenched with water (60 mL), extracted with  $\text{CH}_2\text{Cl}_2$  (50 mL x 3), dried over  $\text{MgSO}_4$ , filtered, and concentrated to give crude aldehyde **8** as a yellow oil (3.30 g).

A solution of the above aldehyde in EtOH (10.0 mL) was added to a solution of triethylorthoformate (14.82 g, 100.0 mmol), HCl (33% w/w in EtOH, 10.0 mL), and concentrated sulfuric acid (0.25 mL) in EtOH (50.0 mL) under  $\text{N}_2$ . Upon stirring at room temperature for 2 days, the reaction mixture was brought to  $\text{pH} > 7$  with saturated  $\text{NaHCO}_3$  aqueous solution, extracted with  $\text{Et}_2\text{O}$  (75 mL x 3), washed with  $\text{H}_2\text{O}$  (30 mL x 3), dried over  $\text{MgSO}_4$ , filtered, concentrated, and purified by flash column chromatography (silica gel, eluent: PE/EtOAc = 10/1) to give *N,N*-dibenzylamino acetal **9** as a yellow oil (3.02 g, 75% overall yield).  $[\alpha]_{\text{D}}^{20} = -24.5$  ( $c$  0.94,  $\text{CHCl}_3$ ) [ lit.<sup>1</sup> for (*S*)-**9**;  $[\alpha]_{\text{D}} = -17.8$  ( $c$  0.9,  $\text{CHCl}_3$ ) ]; IR (film) 1494, 1453, 1117, 1060  $\text{cm}^{-1}$ ;  $^1\text{H}$  NMR (400 MHz,  $\text{CDCl}_3$ )  $\delta$  7.28-7.07 (m, 15H), 4.58 (d,  $J = 4.4$  Hz, 1H), 3.79 (d,  $J = 13.6$  Hz, 2H), 3.74 (d,  $J = 13.6$  Hz, 2H), 3.71-3.66 (m, 1H), 3.63-3.46 (m, 2H), 3.41-3.32 (m, 1H), 3.13-3.06 (m, 1H), 2.94 (dd,  $J = 14.4, 4.8$  Hz, 1H), 2.89 (dd,  $J = 14.4, 9.2$  Hz, 1H), 1.20 (t,  $J = 7.2$  Hz, 6H);  $^{13}\text{C}$  NMR (100 MHz,  $\text{CDCl}_3$ )

$\delta$  141.3, 140.6, 129.9, 128.9, 128.2, 128.1, 126.7, 125.8, 105.1, 63.31, 63.26, 60.4, 54.6, 32.8, 15.7, 15.6; HRMS Calcd for C<sub>27</sub>H<sub>34</sub>NO<sub>2</sub> (M+H): 404.2584; Found: 404.2583.

(1) M. A. Graham, A. H. Wadsworth, A. Zahid and C. M. Rayner, *Org. Biomol. Chem.*, 2003, **1**, 834.

To a solution of *N,N*-dibenzylamino acetal **9** (0.404 g, 1.0 mmol) in MeOH (20.0 mL) was added Pd(OH)<sub>2</sub>/C (20%, 0.060 g).<sup>1</sup> Upon stirring at room temperature overnight under H<sub>2</sub> (1 atm), the reaction mixture was filtered through a pad of Celite, washed with CH<sub>2</sub>Cl<sub>2</sub> (80 mL), concentrated, and purified by flash column chromatography (silica gel, eluent: EtOAc/MeOH = 60/1 to 40/1) to give  $\alpha$ -amino acetal **6h** as a yellow oil (0.142 g, 64%).  $[\alpha]_D^{20} = -19.0$  (*c* 1.05, CHCl<sub>3</sub>) (99.5% ee).

(1) J. Huang, F. Wang, D.-M. Du and J. Xu, *Synthesis*, 2005, 2122.

### The transformation of $\alpha$ -amino acetal **6h** to corresponding $\alpha$ -amino acid (Scheme 3)

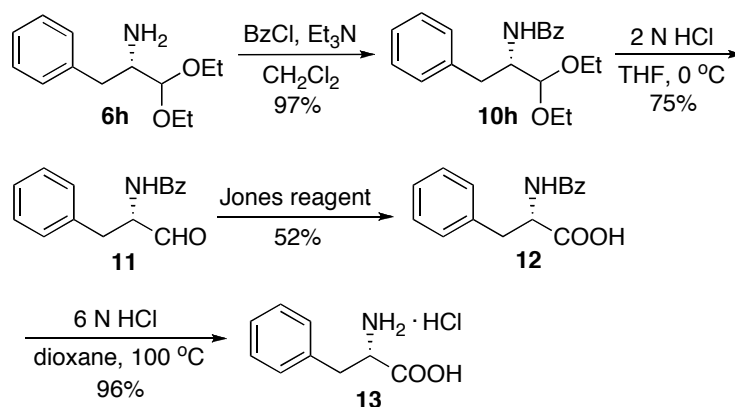

To a solution of  $\alpha$ -amino acetal **6h** (0.112 g, 0.50 mmol) in  $\text{CH}_2\text{Cl}_2$  (5.0 mL) were added  $\text{Et}_3\text{N}$  (0.091 g, 0.90 mmol) and  $\text{PhCOCl}$  (0.090 g, 0.75 mmol). Upon stirring at room temperature for 30 min, the reaction mixture was purified by flash column chromatography (silica gel, eluent:  $\text{PE}/\text{EtOAc} = 8/1$ ) to give *N*-benzoyl amine **10h** as a white solid (0.159 g, 97%). mp.  $93\text{--}94\text{ }^\circ\text{C}$ ;  $[\alpha]_{\text{D}}^{20} = -28.7$  ( $c$  0.95,  $\text{CHCl}_3$ ); IR (film)  $3270, 1638, 1541, 1066\text{ cm}^{-1}$ ;  $^1\text{H}$  NMR (400 MHz,  $\text{CDCl}_3$ )  $\delta$  7.73–7.67 (m, 2H), 7.52–7.45 (m, 1H), 7.44–7.38 (m, 2H), 7.32–7.25 (m, 4H), 7.24–7.17 (m, 1H), 6.36 (d,  $J = 8.0\text{ Hz}$ , 1H), 4.61–4.52 (m, 1H), 4.45 (d,  $J = 2.8\text{ Hz}$ , 1H), 3.85–3.76 (m, 1H), 3.67–3.46 (m, 3H), 3.05 (dd,  $J = 14.0, 6.4\text{ Hz}$ , 1H), 2.97 (dd,  $J = 14.0, 7.6\text{ Hz}$ , 1H), 1.26 (t,  $J = 7.2\text{ Hz}$ , 3H), 1.18 (t,  $J = 7.2\text{ Hz}$ , 3H);  $^{13}\text{C}$  NMR (100 MHz,  $\text{CDCl}_3$ )  $\delta$  167.4, 138.3, 134.9, 131.6, 129.5, 128.70, 128.66, 127.1, 126.6, 102.1, 63.9, 63.8, 52.8, 35.9, 15.54, 15.49; HRMS Calcd for  $\text{C}_{20}\text{H}_{25}\text{NNaO}_3$  ( $\text{M}+\text{Na}$ ): 350.1727; Found: 350.1732.

To a solution of **10h** (0.131 g, 0.40 mmol) in  $\text{THF}$  (6.5 mL) was added 2 N  $\text{HCl}$  (26.0 mL). Upon stirring at  $0\text{ }^\circ\text{C}$  overnight,<sup>1</sup> the reaction mixture was neutralized to  $\text{pH} = 7$  by solid  $\text{NaHCO}_3$ , extracted with  $\text{CH}_2\text{Cl}_2$  (40 mL x 3), dried over  $\text{MgSO}_4$ , filtered, concentrated, and purified by flash column chromatography (silica gel, eluent:  $\text{CH}_2\text{Cl}_2/\text{MeOH} = 50/1$ ) to give *N*-benzoylphenylalaninaldehyde (**11**) as a white solid (0.076 g, 75%). mp.  $135\text{--}137\text{ }^\circ\text{C}$ ;  $[\alpha]_{\text{D}}^{20} = -90.3$  ( $c$  0.98,  $\text{EtOH}$ ) [ lit.<sup>2</sup> for (*S*)-**11**;  $[\alpha]_{\text{D}} = -109$  ( $c$  3,  $\text{EtOH}$ ) ]; IR (film)  $3307, 1636, 1542\text{ cm}^{-1}$ ;  $^1\text{H}$  NMR (400 MHz,  $\text{CDCl}_3$ )  $\delta$  9.73 (s, 1H), 7.77–7.68 (m, 2H), 7.56–7.49



(m, 1H), 7.47-7.38 (m, 2H), 7.35- 7.23 (m, 3H), 7.22-7.15 (m, 2H), 6.73 (d,  $J = 4.4$  Hz, 1H), 4.96-4.87 (m, 1H), 3.34 (dd,  $J = 14.0, 6.0$  Hz, 1H), 3.27 (dd,  $J = 14.0, 6.8$  Hz, 1H);  $^{13}\text{C}$  NMR (100 MHz,  $\text{CDCl}_3$ )  $\delta$  199.0, 167.5, 135.7, 133.8, 132.2, 129.6, 129.1, 128.9, 127.5, 127.2, 60.4, 35.4; HRMS Calcd for  $\text{C}_{16}\text{H}_{16}\text{NO}_2$  (M+H): 254.1176; Found: 254.1172.

(1) T. Schmidlin and C. Tamm, *Helv. Chim. Acta*, 1980, **63**, 121.

(2) M. S. Silver and J. H. Haskell, *J. Med. Chem.*, 1989, **32**, 1253.

To a solution of **11** (0.071 g, 0.28 mmol) in acetone (2.0 mL) was added Jones reagent (1.0 mL) dropwise at 0 °C over 30 min.<sup>1</sup> After the reaction mixture was stirred at 0 °C for 3 h, a few drops of isopropyl alcohol was added. The reaction mixture was concentrated, dissolved in  $\text{H}_2\text{O}$  (30 mL), extracted with  $\text{CH}_2\text{Cl}_2$  (30 mL x 3), dried over  $\text{MgSO}_4$ , filtered, concentrated, and purified by flash column chromatography (silica gel, eluent:  $\text{CH}_2\text{Cl}_2/\text{MeOH} = 50/1$ ) to give *N*-benzoyl-(*S*)-phenylalanine (**12**) as a white solid (0.039 g, 52%). mp. 179-181 °C;  $[\alpha]_{\text{D}}^{20} = -29.9$  ( $c$  0.86, MeOH) [ lit.<sup>2</sup> for (*S*)-**12**;  $[\alpha]_{\text{D}} = -41.4$  ( $c$  1.0, MeOH) ]; IR (film) 3427, 3322, 1610, 1537  $\text{cm}^{-1}$ ;  $^1\text{H}$  NMR (400 MHz,  $\text{CD}_3\text{OD}$ )  $\delta$  7.73-7.68 (m, 2H), 7.54-7.48 (m, 1H), 7.45-7.38 (m, 2H), 7.31-7.25 (m, 4H), 7.22-7.16 (m, 1H), 4.87-4.83 (m, 1H), 3.34 (dd,  $J = 14.0, 9.6$  Hz, 1H), 3.12 (dd,  $J = 14.0, 4.4$  Hz, 1H);  $^{13}\text{C}$  NMR (100 MHz,  $\text{CD}_3\text{OD}$ )  $\delta$  174.9, 170.2, 138.7, 135.3, 132.8, 130.2, 129.5, 129.4, 128.3, 127.8, 55.6, 38.2; HRMS Calcd for  $\text{C}_{16}\text{H}_{16}\text{NO}_3$  (M+H): 270.1125; Found: 270.1122.

(1) J. Mulzer, A. Angermann, B. Schubert and C. Seilz, *J. Org. Chem.*, 1986, **51**, 5294.

(2) A. Miyashita and H. Takaya, *Tetrahedron*, 1984, **40**, 1245.

A solution of (*S*)-**12** (0.032 g, 0.12 mmol) in 6 N HCl (3.0 mL) and dioxane (0.5 mL) was stirred at 100 °C overnight.<sup>1,2</sup> The reaction mixture was cooled to rt and washed with  $\text{Et}_2\text{O}$  (3.0 mL x 3). The aqueous phase was concentrated to give amino acid hydrochloride **13** as a white solid (0.023 g, 96%). mp. 230-231 °C;  $[\alpha]_{\text{D}}^{20} = +34.0$  ( $c$  0.50, 1N HCl) [ lit.<sup>3</sup> for (*S*)-**13**;  $[\alpha]_{\text{D}}^{25} = +43$  ( $c$  0.5, 1N HCl) ]; IR (film) 3417, 2539, 1658, 1631  $\text{cm}^{-1}$ ;  $^1\text{H}$  NMR (400 MHz,  $\text{CD}_3\text{OD}$ )  $\delta$  7.41-7.35 (m, 2H), 7.34-7.28 (m, 3H), 4.29-4.23 (m, 1H),

3.37-3.33 (m, 1H), 3.18 (dd,  $J = 14.4, 7.6$  Hz, 1H);  $^{13}\text{C}$  NMR (100 MHz,  $\text{CD}_3\text{OD}$ )  $\delta$  171.2, 135.6, 130.5, 130.1, 128.9, 55.1, 37.3; HRMS Calcd for  $\text{C}_9\text{H}_{12}\text{NO}_2$  (M-Cl): 166.0863; Found: 166.0864.

- (1) X. Xiao, M. Liu, C. Rong, F. Xue, S. Li, Y. Xie and Y. Shi, *Org. Lett.*, 2012, **14**, 5270.
- (2) D. M. Coe, R. Perciaccante and P. A. Procopiu, *Org. Biomol. Chem.*, 2003, **1**, 1106.
- (3) H. Josien, A. Martin and G. Chassaing, *Tetrahedron Lett.*, 1991, **32**, 6547.

## The chromatograms for the determination of enantioselectivity

Table 1, entry 10

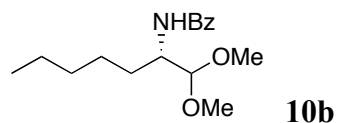

**HPLC Condition:** Column: Chiralpak AD-H, Daicel Chemical Industries, Ltd.;

**Eluent:** Hexanes/IPA (98/2); **Flow rate:** 0.5 mL/min; **Detection:** UV230 nm.

**Racemic**

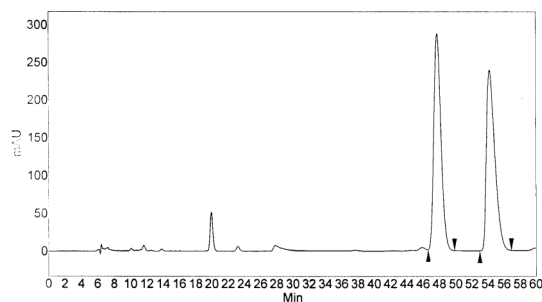

| Index | Time [Min] | Area % [%] | Start [Min] | End [Min] |
|-------|------------|------------|-------------|-----------|
| 1     | 47.75      | 50.049     | 46.63       | 49.85     |
| 2     | 54.23      | 49.951     | 53.00       | 56.90     |
| Total |            | 100.000    |             |           |

**Chiral**

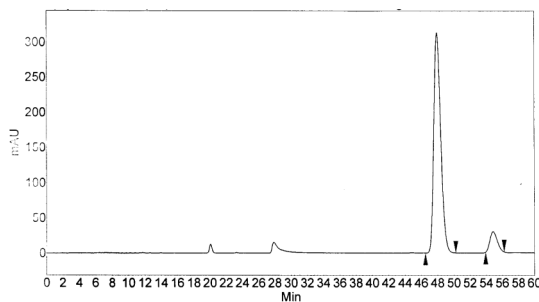

| Index | Time [Min] | Area % [%] | Start [Min] | End [Min] |
|-------|------------|------------|-------------|-----------|
| 1     | 47.95      | 91.026     | 46.50       | 50.22     |
| 2     | 54.85      | 8.974      | 53.93       | 56.22     |
| Total |            | 100.000    |             |           |

Table 1, entry 11

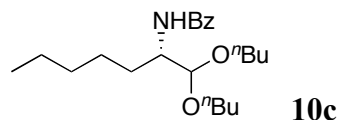

**HPLC Condition:** Column: Chiralpak AD-H, Daicel Chemical Industries, Ltd.;

**Eluent:** Hexanes/IPA (98/2); **Flow rate:** 0.5 mL/min; **Detection:** UV230 nm.

**Racemic**

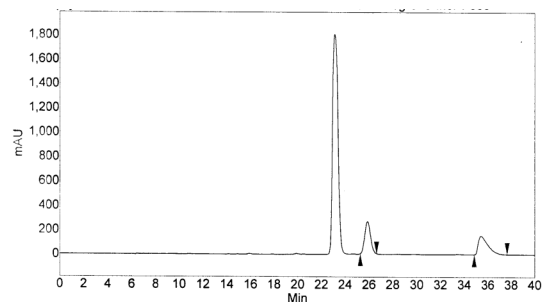

| Index | Time [Min] | Area % [%] | Start [Min] | End [Min] |
|-------|------------|------------|-------------|-----------|
| 1     | 25.87      | 50.174     | 25.26       | 26.63     |
| 2     | 35.41      | 49.826     | 34.84       | 37.65     |
| Total |            | 100.000    |             |           |

**Chiral**

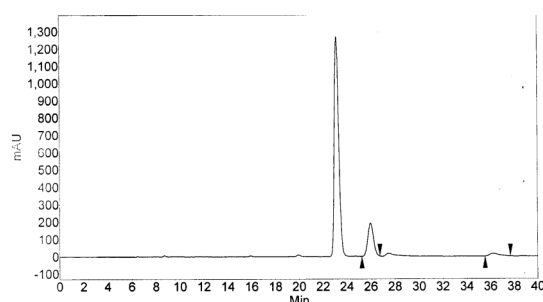

| Index | Time [Min] | Area % [%] | Start [Min] | End [Min] |
|-------|------------|------------|-------------|-----------|
| 1     | 25.99      | 88.184     | 25.24       | 26.75     |
| 2     | 36.21      | 11.816     | 35.55       | 37.68     |
| Total |            | 100.000    |             |           |

**Table 1, entry 12**

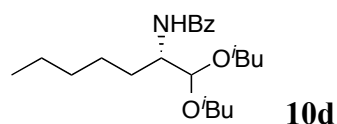

**HPLC Condition:** **Column:** Chiralpak AD-H, Daicel Chemical Industries, Ltd.;  
**Eluent:** Hexanes/IPA (98/2); **Flow rate:** 0.5 mL/min; **Detection:** UV230 nm.

**Racemic**

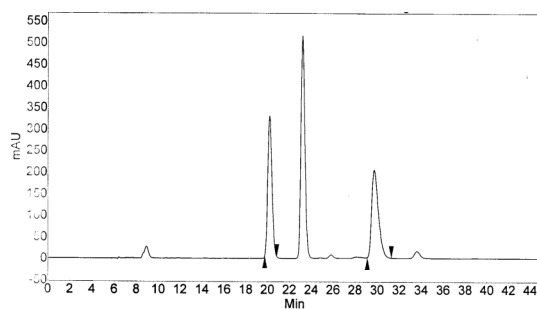

| Index | Time [Min] | Area [%] | Start [Min] | End [Min] |
|-------|------------|----------|-------------|-----------|
| 1     | 20.21      | 49.978   | 19.74       | 20.85     |
| 2     | 29.76      | 50.022   | 29.12       | 31.30     |
| Total |            | 100.000  |             |           |

**Chiral**

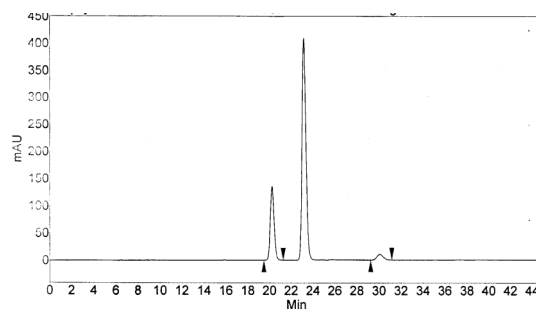

| Index | Time [Min] | Area [%] | Start [Min] | End [Min] |
|-------|------------|----------|-------------|-----------|
| 1     | 20.23      | 88.696   | 19.46       | 21.27     |
| 2     | 30.08      | 11.304   | 29.26       | 31.16     |
| Total |            | 100.000  |             |           |

**Table 2, entry 1**

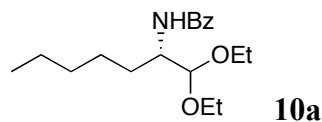

**HPLC Condition:** **Column:** Chiralpak AD-H, Daicel Chemical Industries, Ltd.;  
**Eluent:** Hexanes/IPA (95/5); **Flow rate:** 0.5 mL/min; **Detection:** UV230 nm.

**Racemic**

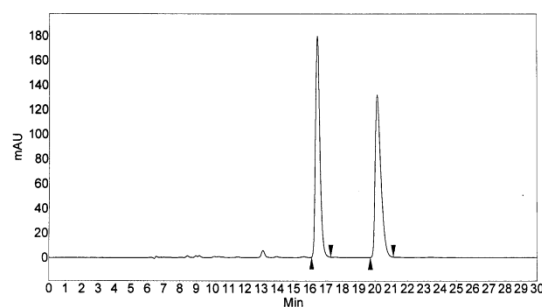

| Index | Time [Min] | Area [%] | Start [Min] | End [Min] |
|-------|------------|----------|-------------|-----------|
| 1     | 16.52      | 50.068   | 16.13       | 17.31     |
| 2     | 20.19      | 49.932   | 19.72       | 21.15     |
| Total |            | 100.000  |             |           |

**Chiral**

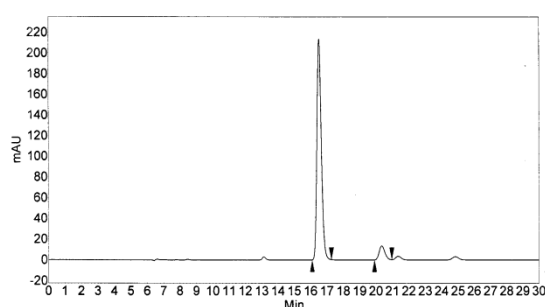

| Index | Time [Min] | Area [%] | Start [Min] | End [Min] |
|-------|------------|----------|-------------|-----------|
| 1     | 16.53      | 92.588   | 16.10       | 17.28     |
| 2     | 20.35      | 7.412    | 19.91       | 20.96     |
| Total |            | 100.000  |             |           |

**Table 2, entry 2**

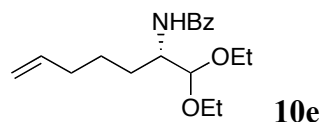

**HPLC Condition:** **Column:** Chiralpak AD-H, Daicel Chemical Industries, Ltd.;

**Eluent:** Hexanes/IPA (95/5); **Flow rate:** 0.5 mL/min; **Detection:** UV230 nm.

**Racemic**

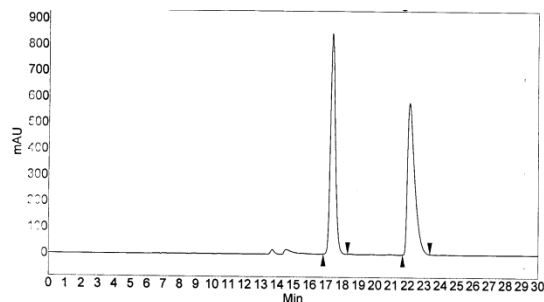

| Index | Time [Min] | Area % [%] | Start [Min] | End [Min] |
|-------|------------|------------|-------------|-----------|
| 1     | 17.39      | 49.817     | 16.83       | 18.33     |
| 2     | 22.11      | 50.183     | 21.68       | 23.34     |
| Total |            | 100.000    |             |           |

**Chiral**

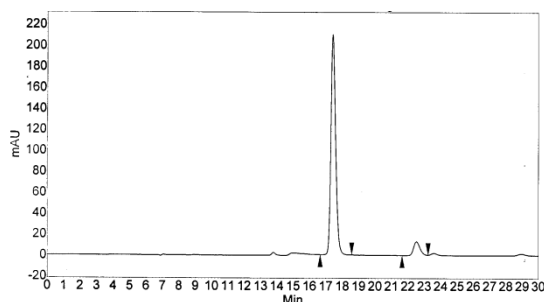

| Index | Time [Min] | Area % [%] | Start [Min] | End [Min] |
|-------|------------|------------|-------------|-----------|
| 1     | 17.44      | 92.156     | 16.66       | 18.58     |
| 2     | 22.52      | 7.844      | 21.64       | 23.22     |
| Total |            | 100.000    |             |           |

**Table 2, entry 3**

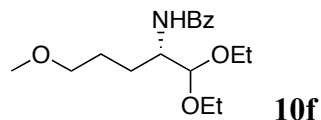

**HPLC Condition:** **Column:** Chiralpak AD-H, Daicel Chemical Industries, Ltd.;

**Eluent:** Hexanes/IPA (95/5); **Flow rate:** 0.5 mL/min; **Detection:** UV220 nm.

**Racemic**

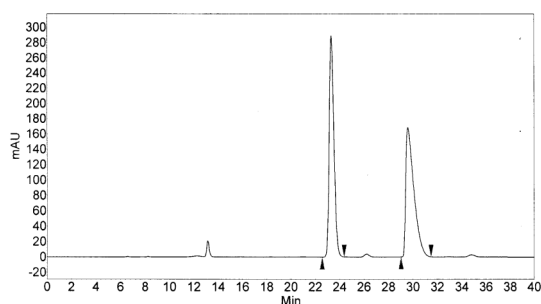

| Index | Time [Min] | Area % [%] | Start [Min] | End [Min] |
|-------|------------|------------|-------------|-----------|
| 1     | 23.35      | 49.991     | 22.57       | 24.36     |
| 2     | 29.59      | 50.009     | 29.03       | 31.49     |
| Total |            | 100.000    |             |           |

**Chiral**

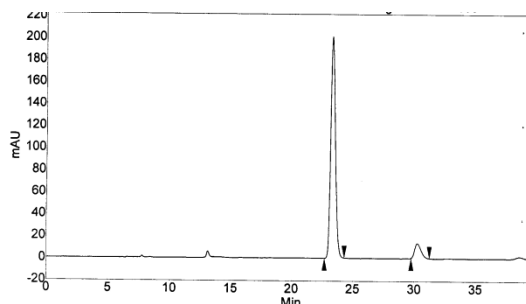

| Index | Time [Min] | Area % [%] | Start [Min] | End [Min] |
|-------|------------|------------|-------------|-----------|
| 1     | 23.36      | 91.581     | 22.70       | 24.31     |
| 2     | 30.27      | 8.419      | 29.75       | 31.24     |
| Total |            | 100.000    |             |           |

**Table 2, entry 4**

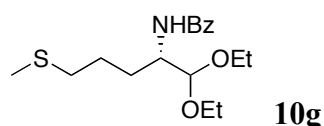

**HPLC Condition:** **Column:** Chiralpak AD-H, Daicel Chemical Industries, Ltd.;  
**Eluent:** Hexanes/IPA (95/5); **Flow rate:** 0.5 mL/min; **Detection:** UV220 nm.

**Racemic**

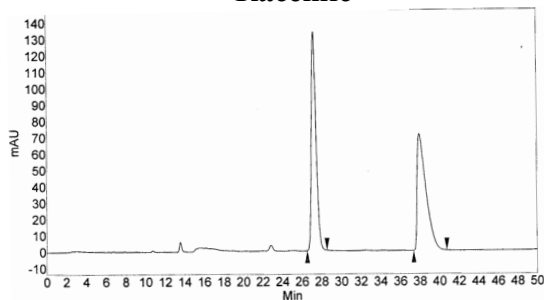

| Index | Time [Min] | Area % [%] | Start [Min] | End [Min] |
|-------|------------|------------|-------------|-----------|
| 1     | 27.25      | 50.025     | 26.52       | 28.53     |
| 2     | 38.00      | 49.975     | 37.36       | 40.71     |
| Total |            | 100.000    |             |           |

**Chiral**

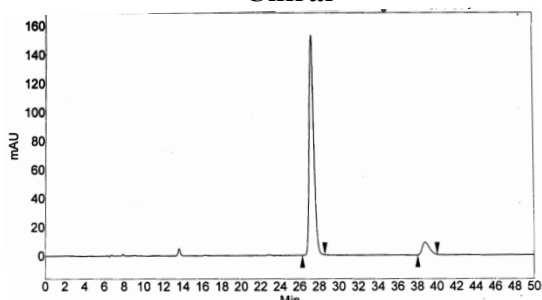

| Index | Time [Min] | Area % [%] | Start [Min] | End [Min] |
|-------|------------|------------|-------------|-----------|
| 1     | 27.28      | 92.020     | 26.28       | 28.57     |
| 2     | 38.81      | 7.980      | 38.06       | 40.04     |
| Total |            | 100.000    |             |           |

**Table 2, entry 5**

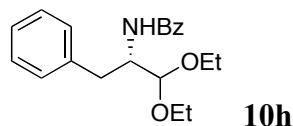

**HPLC Condition:** **Column:** Chiralpak AD-H, Daicel Chemical Industries, Ltd.;  
**Eluent:** Hexanes/IPA (95/5); **Flow rate:** 0.5 mL/min; **Detection:** UV220 nm.

**Racemic**

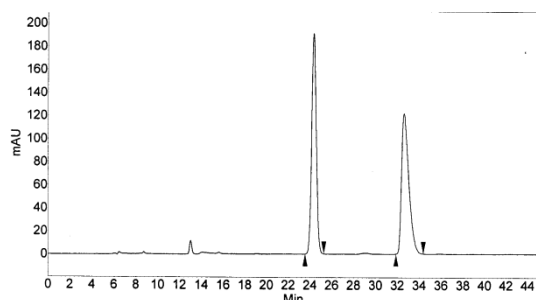

| Index | Time [Min] | Area % [%] | Start [Min] | End [Min] |
|-------|------------|------------|-------------|-----------|
| 1     | 24.35      | 49.996     | 23.54       | 25.26     |
| 2     | 32.60      | 50.004     | 31.86       | 34.37     |
| Total |            | 100.000    |             |           |

**Chiral**

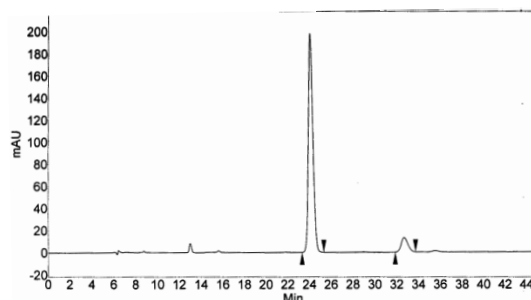

| Index | Time [Min] | Area % [%] | Start [Min] | End [Min] |
|-------|------------|------------|-------------|-----------|
| 1     | 24.16      | 91.456     | 23.31       | 25.31     |
| 2     | 32.68      | 8.544      | 31.86       | 33.72     |
| Total |            | 100.000    |             |           |

**Table 2, entry 6**

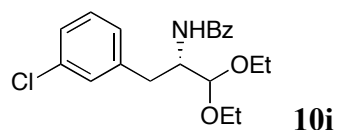

**HPLC Condition:** Column: Chiralpak AD-H, Daicel Chemical Industries, Ltd.;

**Eluent:** Hexanes/IPA (95/5); **Flow rate:** 0.5 mL/min; **Detection:** UV220 nm.

**Racemic**

**Chiral**

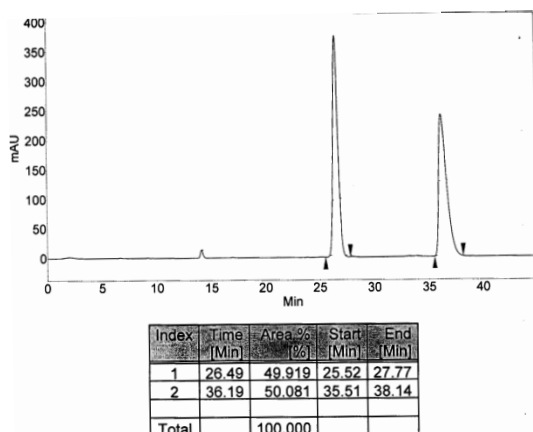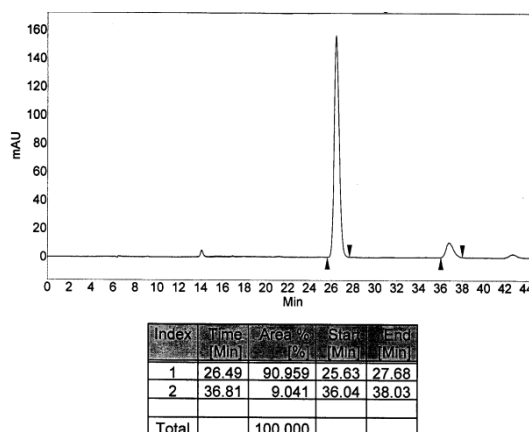

**Table 2, entry 7**

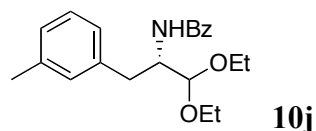

**HPLC Condition:** Column: Chiralpak AD-H, Daicel Chemical Industries, Ltd.;

**Eluent:** Hexanes/IPA (95/5); **Flow rate:** 0.5 mL/min; **Detection:** UV220 nm.

**Racemic**

**Chiral**

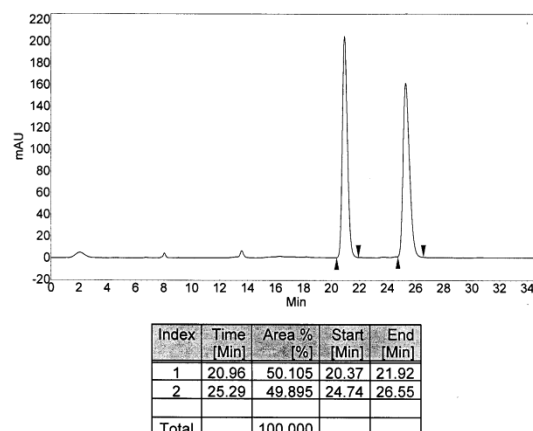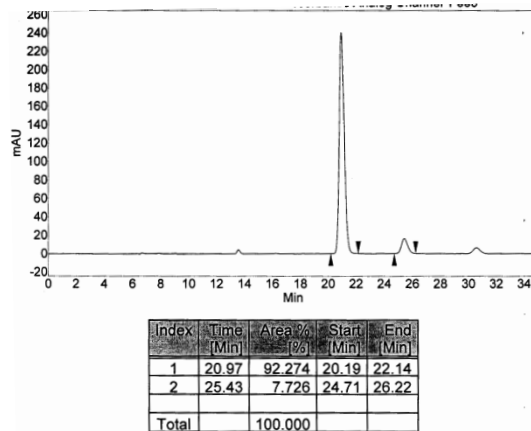

**Table 2, entry 8**

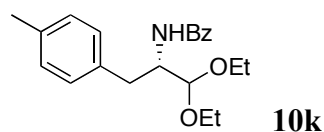

**HPLC Condition:** **Column:** Chiralpak AD-H, Daicel Chemical Industries, Ltd.;

**Eluent:** Hexanes/IPA (95/5); **Flow rate:** 0.5 mL/min; **Detection:** UV230 nm.

**Racemic**

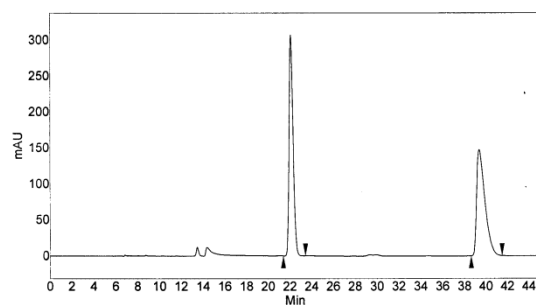

| Index | Time [Min] | Area % [%] | Start [Min] | End [Min] |
|-------|------------|------------|-------------|-----------|
| 1     | 22.13      | 50.128     | 21.39       | 23.42     |
| 2     | 39.43      | 49.872     | 38.64       | 41.50     |
| Total |            | 100.000    |             |           |

**Chiral**

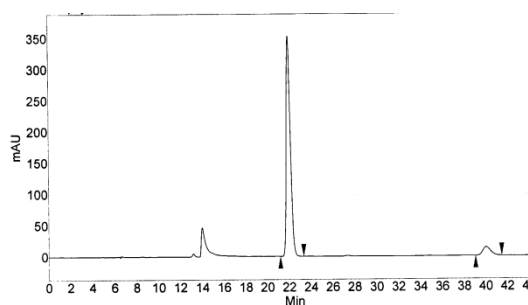

| Index | Time [Min] | Area % [%] | Start [Min] | End [Min] |
|-------|------------|------------|-------------|-----------|
| 1     | 21.97      | 93.068     | 21.18       | 23.31     |
| 2     | 40.03      | 6.932      | 39.06       | 41.47     |
| Total |            | 100.000    |             |           |

**Table 2, entry 9**

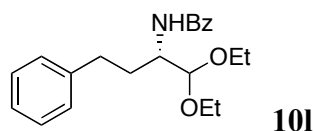

**HPLC Condition:** **Column:** Chiralpak AD-H, Daicel Chemical Industries, Ltd.;

**Eluent:** Hexanes/IPA (95/5); **Flow rate:** 0.5 mL/min; **Detection:** UV230 nm.

**Racemic**

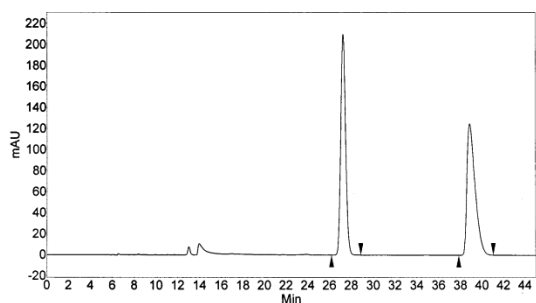

| Index | Time [Min] | Area % [%] | Start [Min] | End [Min] |
|-------|------------|------------|-------------|-----------|
| 1     | 27.29      | 49.984     | 26.19       | 28.89     |
| 2     | 38.89      | 50.016     | 37.85       | 41.05     |
| Total |            | 100.000    |             |           |

**Chiral**

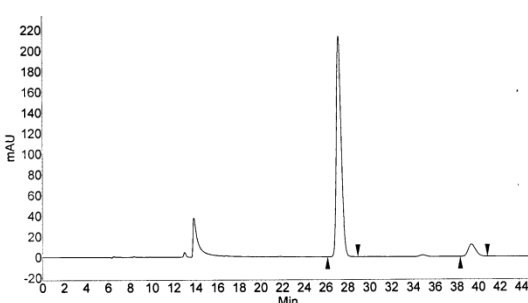

| Index | Time [Min] | Area % [%] | Start [Min] | End [Min] |
|-------|------------|------------|-------------|-----------|
| 1     | 27.25      | 92.130     | 26.15       | 28.93     |
| 2     | 39.36      | 7.870      | 38.31       | 40.82     |
| Total |            | 100.000    |             |           |



**Table 2, entry 10**

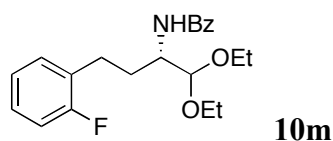

**HPLC Condition:** Column: Chiralpak AD-H, Daicel Chemical Industries, Ltd.;  
**Eluent:** Hexanes/IPA (95/5); **Flow rate:** 0.5 mL/min; **Detection:** UV220 nm.

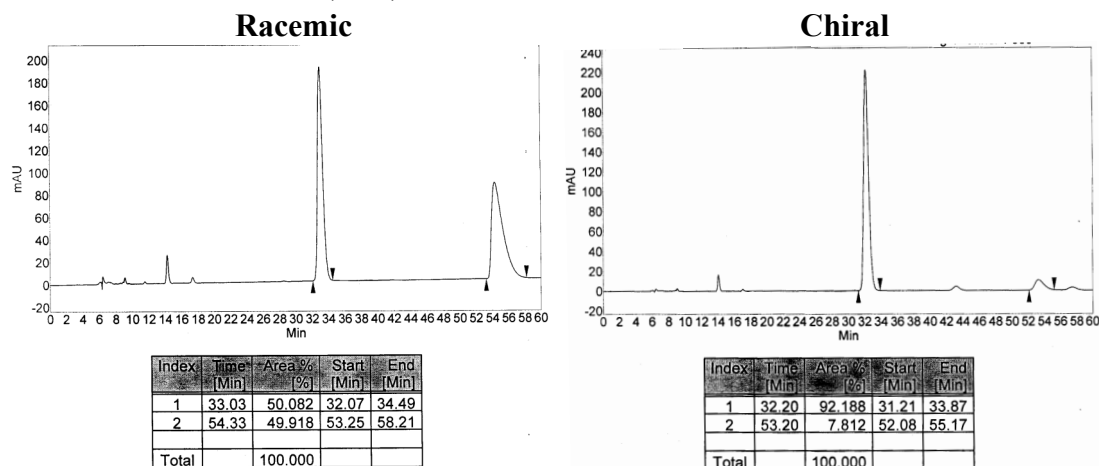

**Table 2, entry 11**

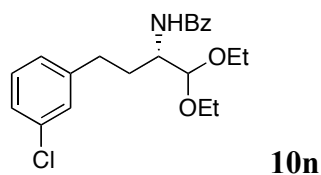

**HPLC Condition:** Column: Chiralpak AD-H, Daicel Chemical Industries, Ltd.;  
**Eluent:** Hexanes/IPA (95/5); **Flow rate:** 0.5 mL/min; **Detection:** UV220 nm.

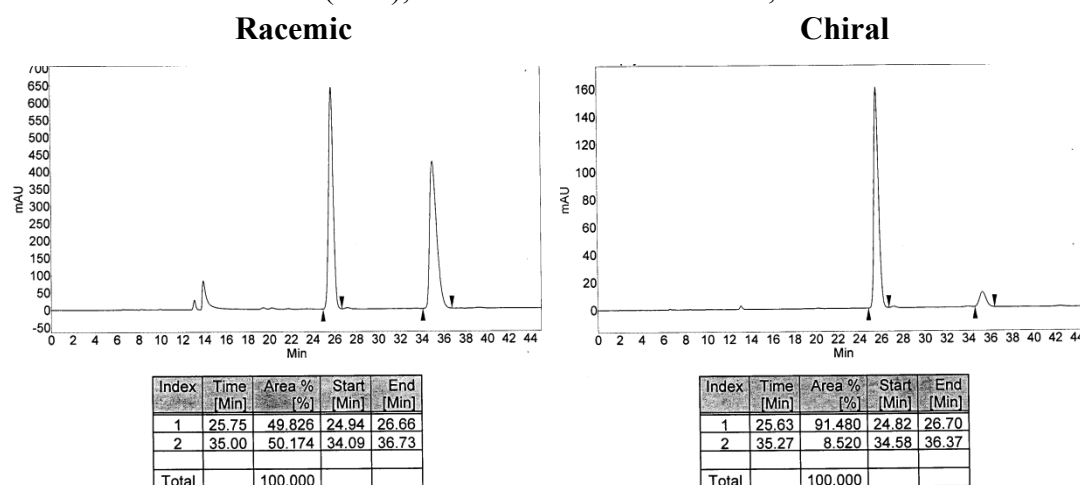

**Table 2, entry 12**

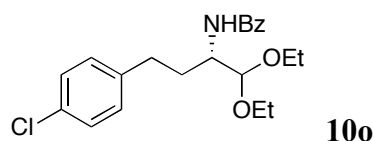

**HPLC Condition:** Column: Chiralpak AD-H, Daicel Chemical Industries, Ltd.;  
**Eluent:** Hexanes/IPA (95/5); **Flow rate:** 0.5 mL/min; **Detection:** UV220 nm.

**Racemic**

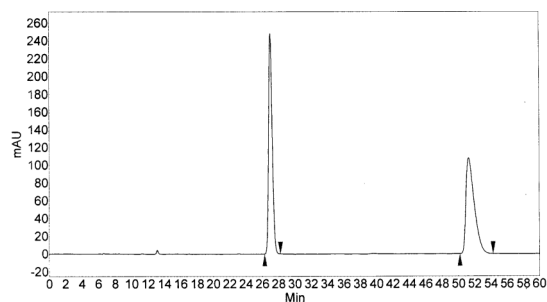

| Index | Time [Min] | Area % [%] | Start [Min] | End [Min] |
|-------|------------|------------|-------------|-----------|
| 1     | 27.07      | 50.086     | 26.28       | 28.22     |
| 2     | 51.29      | 49.914     | 50.18       | 54.24     |
| Total |            | 100.000    |             |           |

**Chiral**

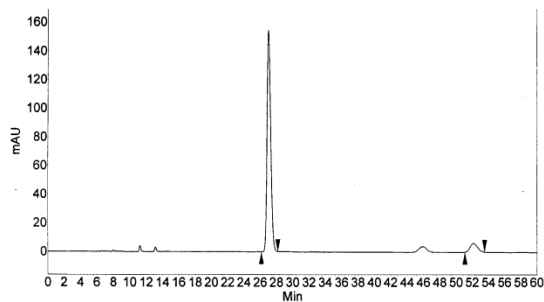

| Index | Time [Min] | Area % [%] | Start [Min] | End [Min] |
|-------|------------|------------|-------------|-----------|
| 1     | 27.09      | 92.557     | 26.13       | 28.17     |
| 2     | 52.13      | 7.443      | 51.08       | 53.50     |
| Total |            | 100.000    |             |           |

**Table 2, entry 13**

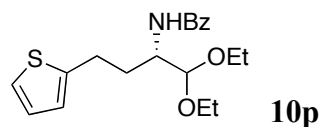

**HPLC Condition:** Column: Chiralpak AD-H, Daicel Chemical Industries, Ltd.;  
**Eluent:** Hexanes/IPA (95/5); **Flow rate:** 0.5 mL/min; **Detection:** UV230 nm.

**Racemic**

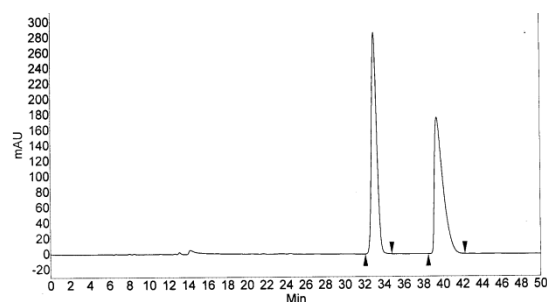

| Index | Time [Min] | Area % [%] | Start [Min] | End [Min] |
|-------|------------|------------|-------------|-----------|
| 1     | 33.05      | 50.047     | 32.10       | 34.78     |
| 2     | 39.40      | 49.953     | 38.49       | 42.21     |
| Total |            | 100.000    |             |           |

**Chiral**

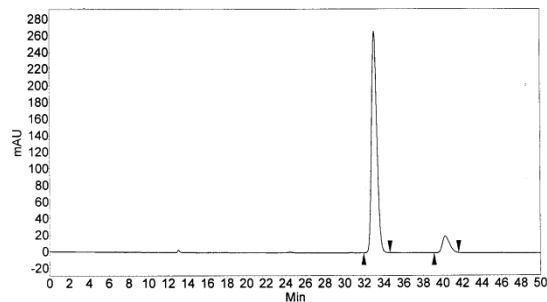

| Index | Time [Min] | Area % [%] | Start [Min] | End [Min] |
|-------|------------|------------|-------------|-----------|
| 1     | 33.07      | 90.968     | 31.96       | 34.62     |
| 2     | 40.24      | 9.032      | 39.10       | 41.61     |
| Total |            | 100.000    |             |           |

**Table 2, entry 14**

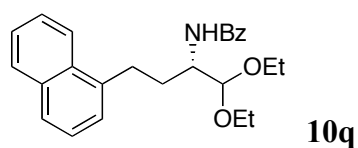

**HPLC Condition:** Column: Chiralpak AD-H, Daicel Chemical Industries, Ltd.;

**Eluent:** Hexanes/IPA (95/5); **Flow rate:** 0.5 mL/min; **Detection:** UV220 nm.

**Racemic**

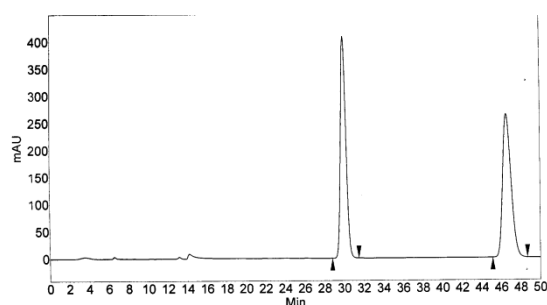

| Index | Time [Min] | Area % [%] | Start [Min] | End [Min] |
|-------|------------|------------|-------------|-----------|
| 1     | 29.93      | 49.905     | 28.79       | 31.48     |
| 2     | 46.53      | 50.095     | 45.10       | 48.66     |
| Total |            | 100.000    |             |           |

**Chiral**

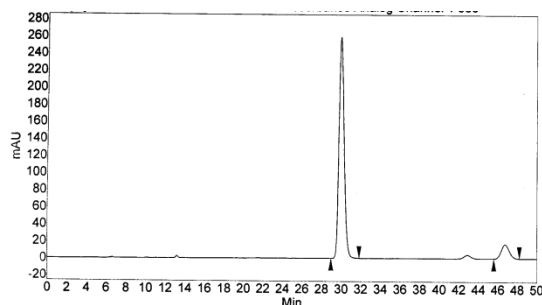

| Index | Time [Min] | Area % [%] | Start [Min] | End [Min] |
|-------|------------|------------|-------------|-----------|
| 1     | 30.01      | 90.839     | 28.95       | 31.84     |
| 2     | 46.72      | 9.161      | 45.56       | 48.19     |
| Total |            | 100.000    |             |           |

**Scheme 2**

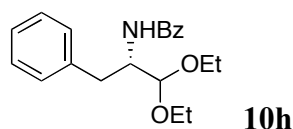

**HPLC Condition:** Column: Chiralpak AD-H, Daicel Chemical Industries, Ltd.;

**Eluent:** Hexanes/IPA (95/5); **Flow rate:** 0.5 mL/min; **Detection:** UV220 nm.

**Racemic**

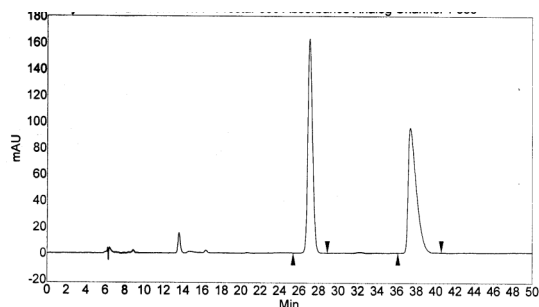

| Index | Time [Min] | Area % [%] | Start [Min] | End [Min] |
|-------|------------|------------|-------------|-----------|
| 1     | 27.16      | 50.009     | 25.39       | 28.90     |
| 2     | 37.43      | 49.991     | 36.12       | 40.56     |
| Total |            | 100.000    |             |           |

**Chiral**

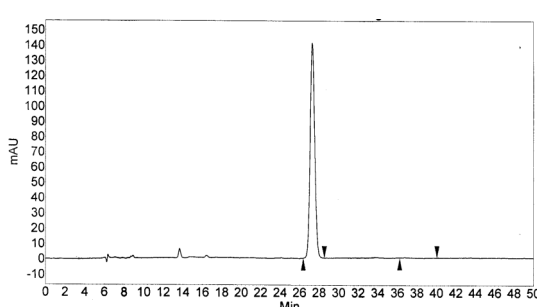

| Index | Time [Min] | Area % [%] | Start [Min] | End [Min] |
|-------|------------|------------|-------------|-----------|
| 1     | 27.31      | 99.811     | 26.37       | 28.53     |
| 2     | 36.69      | 0.189      | 36.22       | 40.04     |
| Total |            | 100.000    |             |           |

Table 1, entry 10

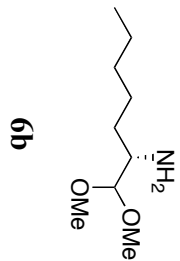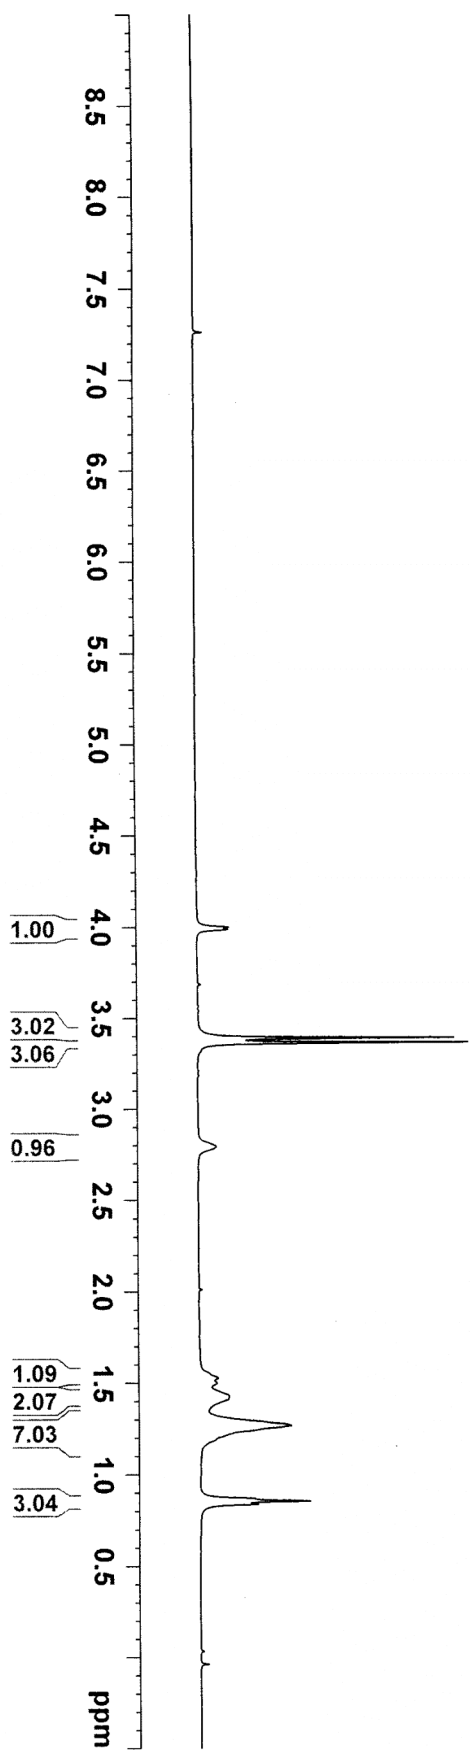

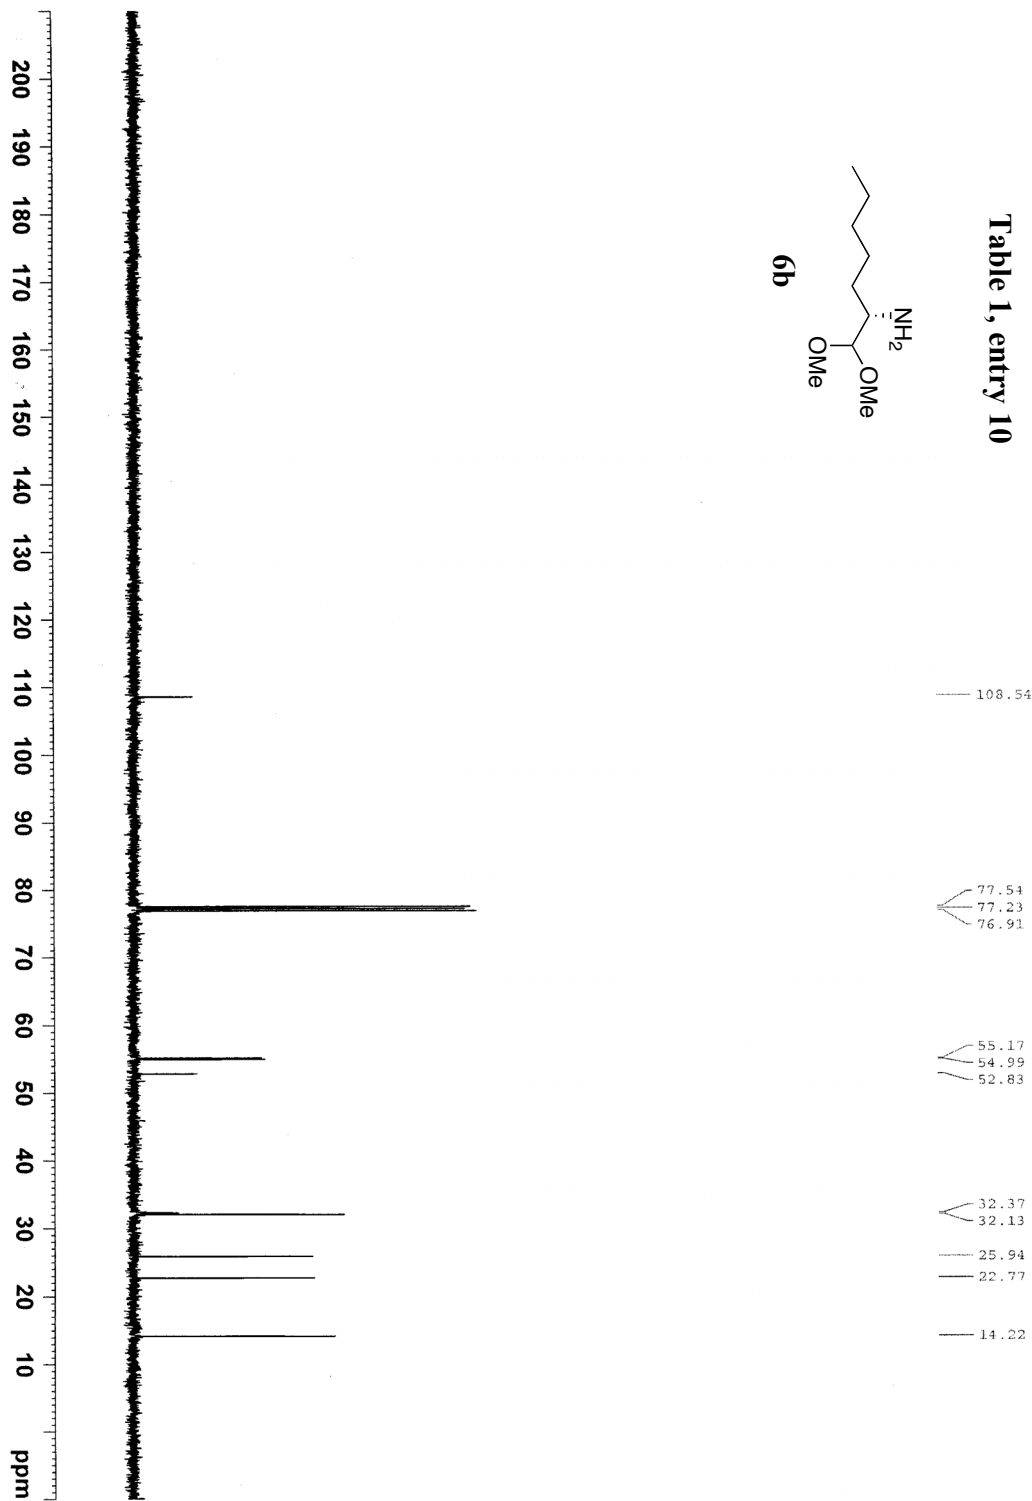

Table 1, entry 11

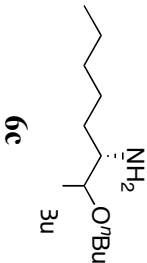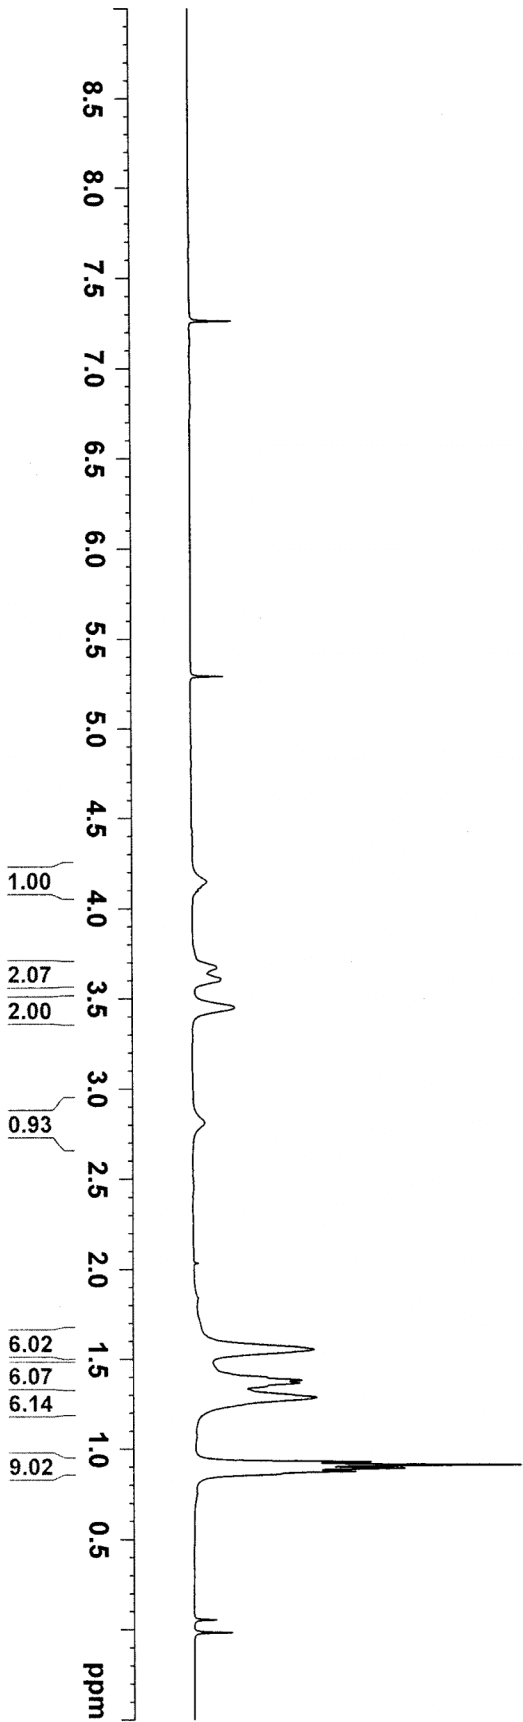

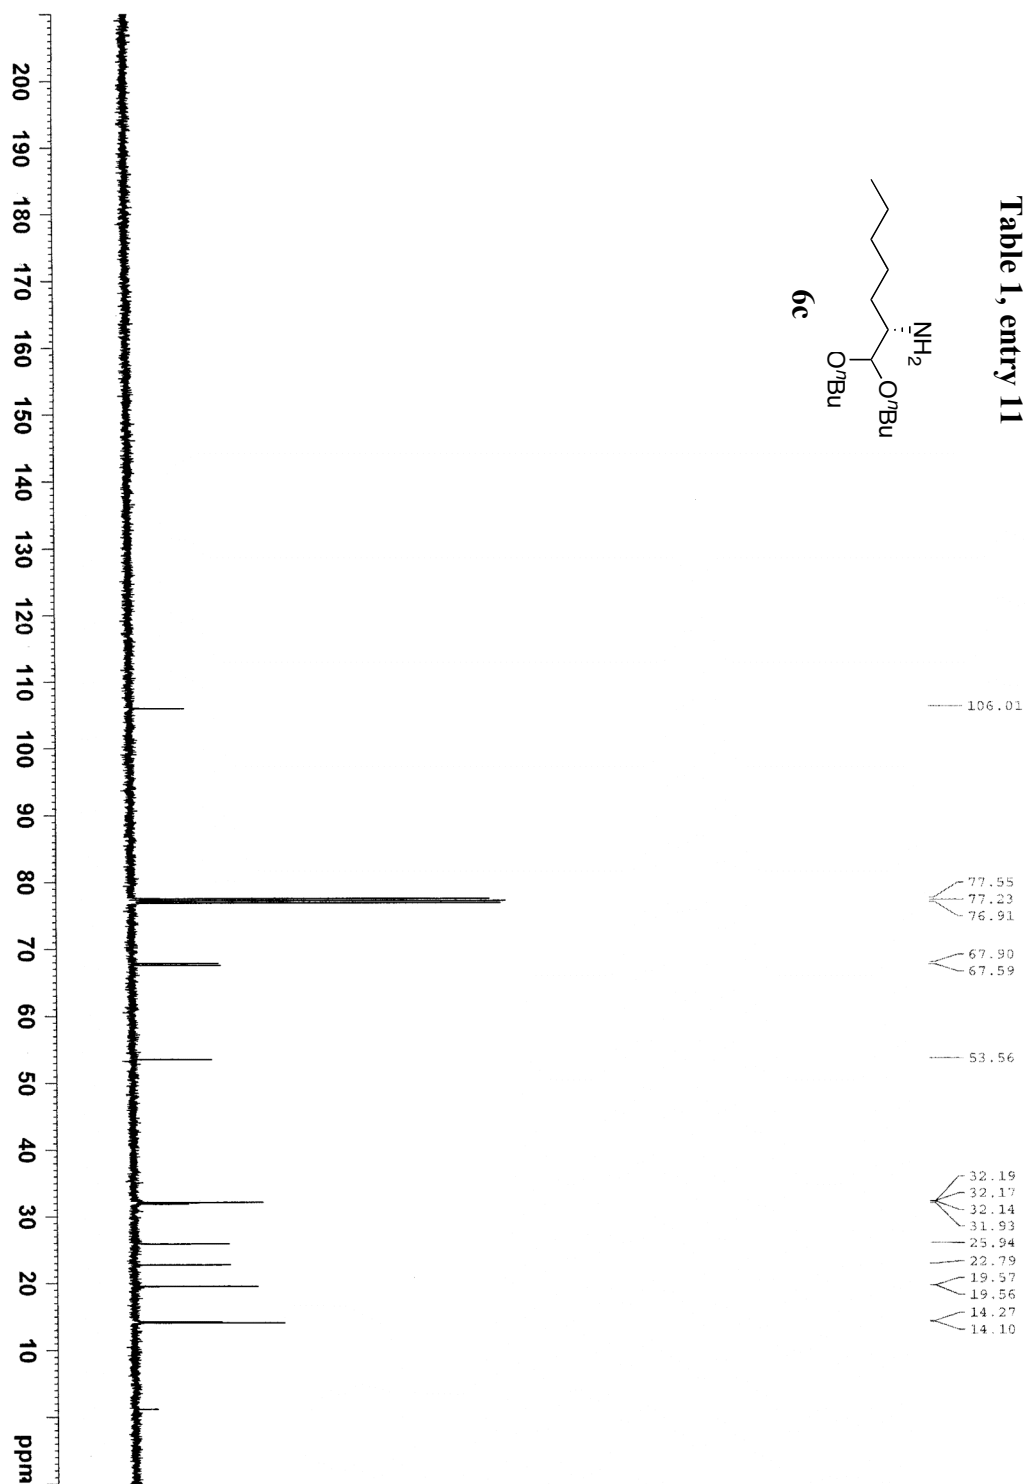

Table I, entry 12

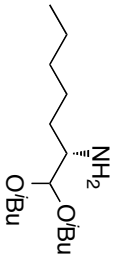

6d

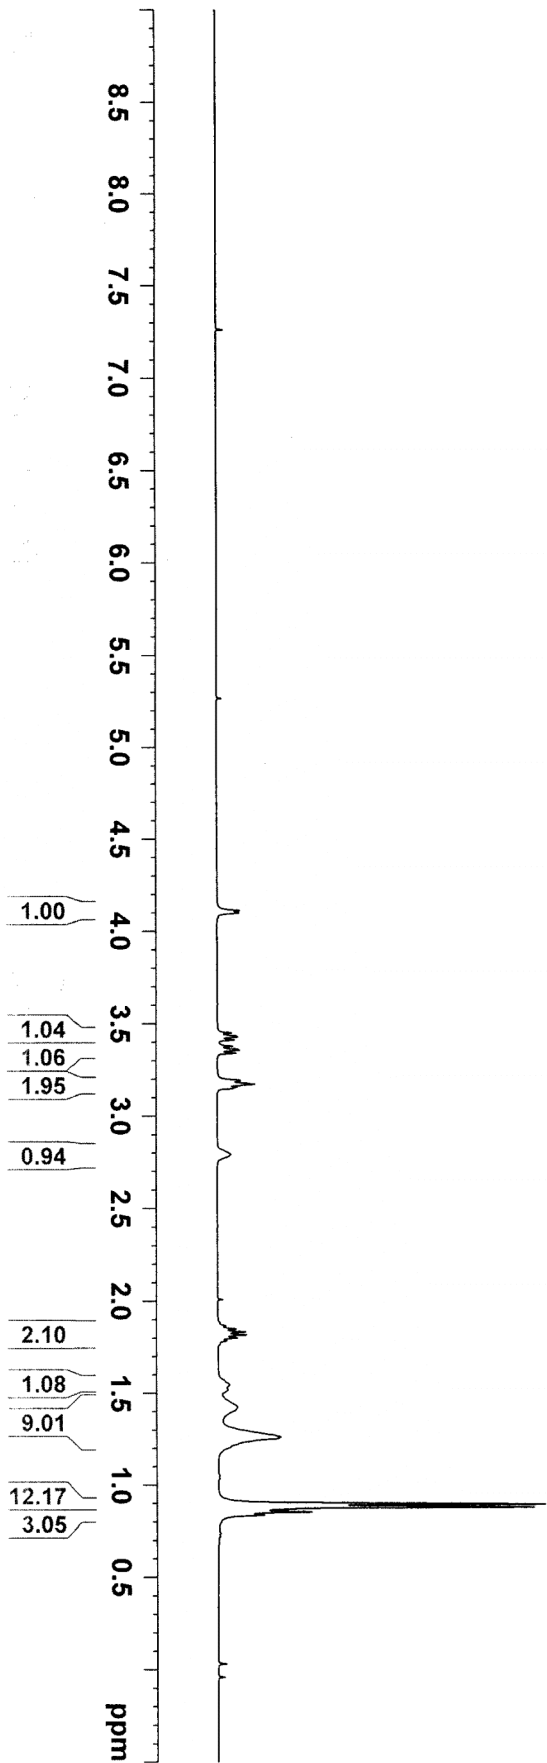



Table 1, entry 12

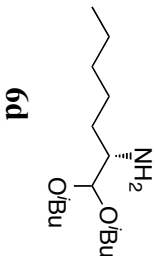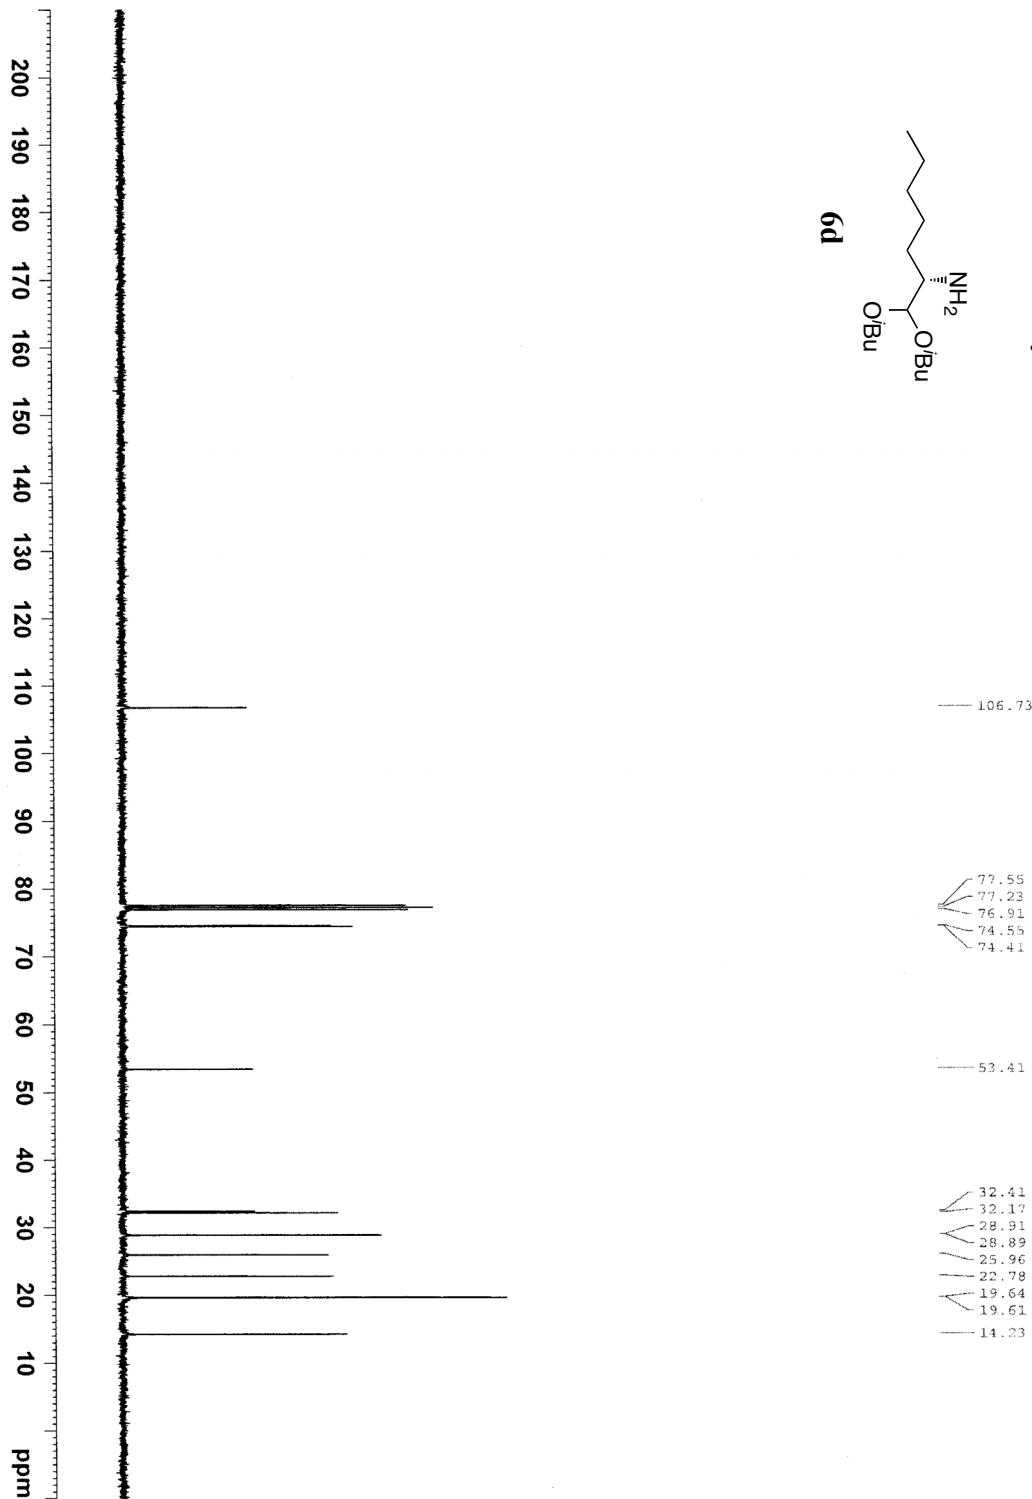

Table 2, entry 1

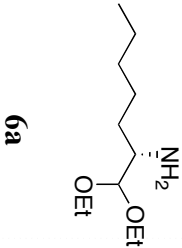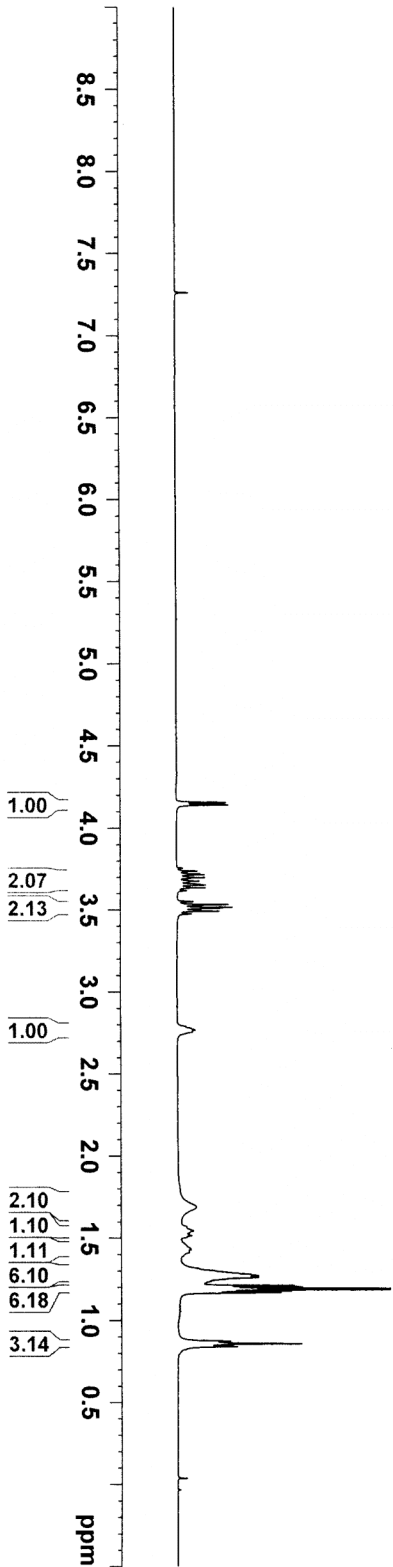

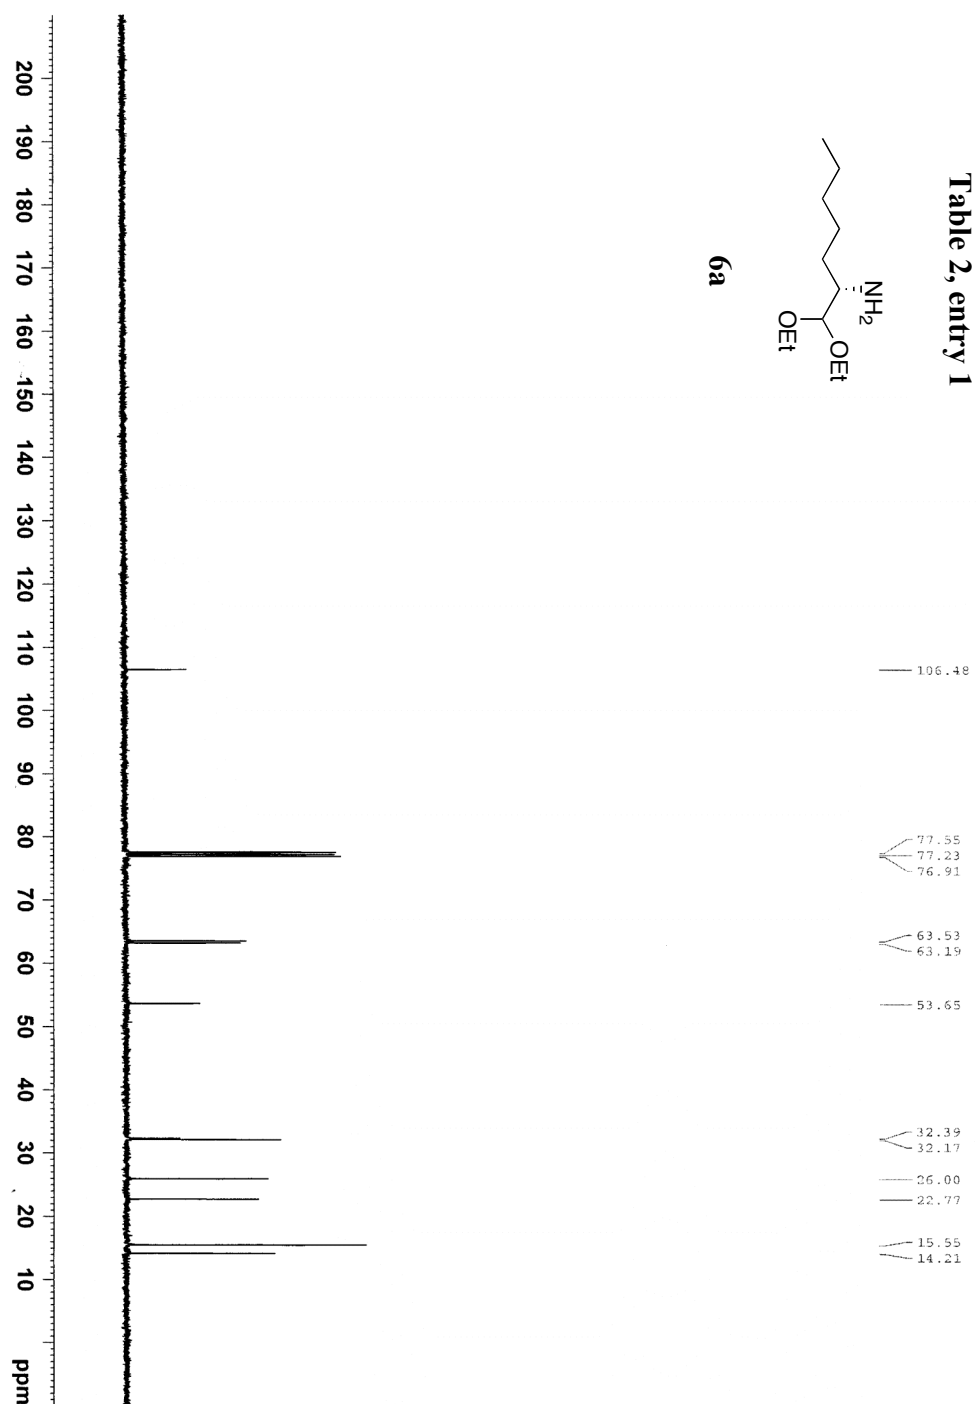

Table 2, entry 2

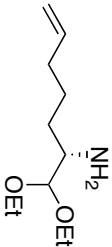

6e

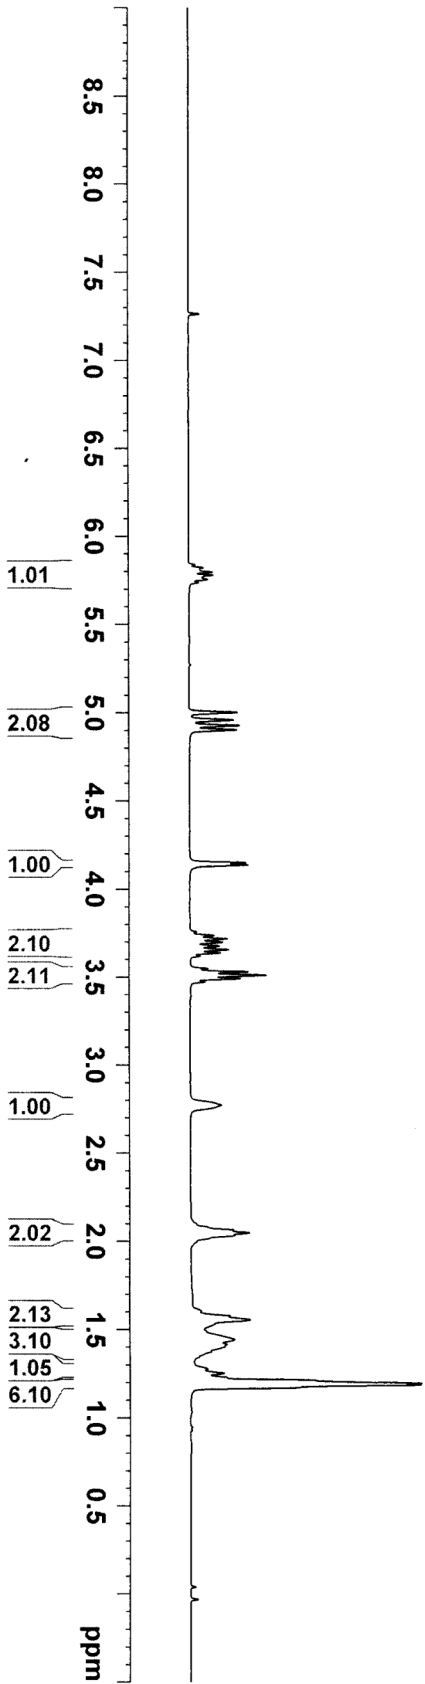

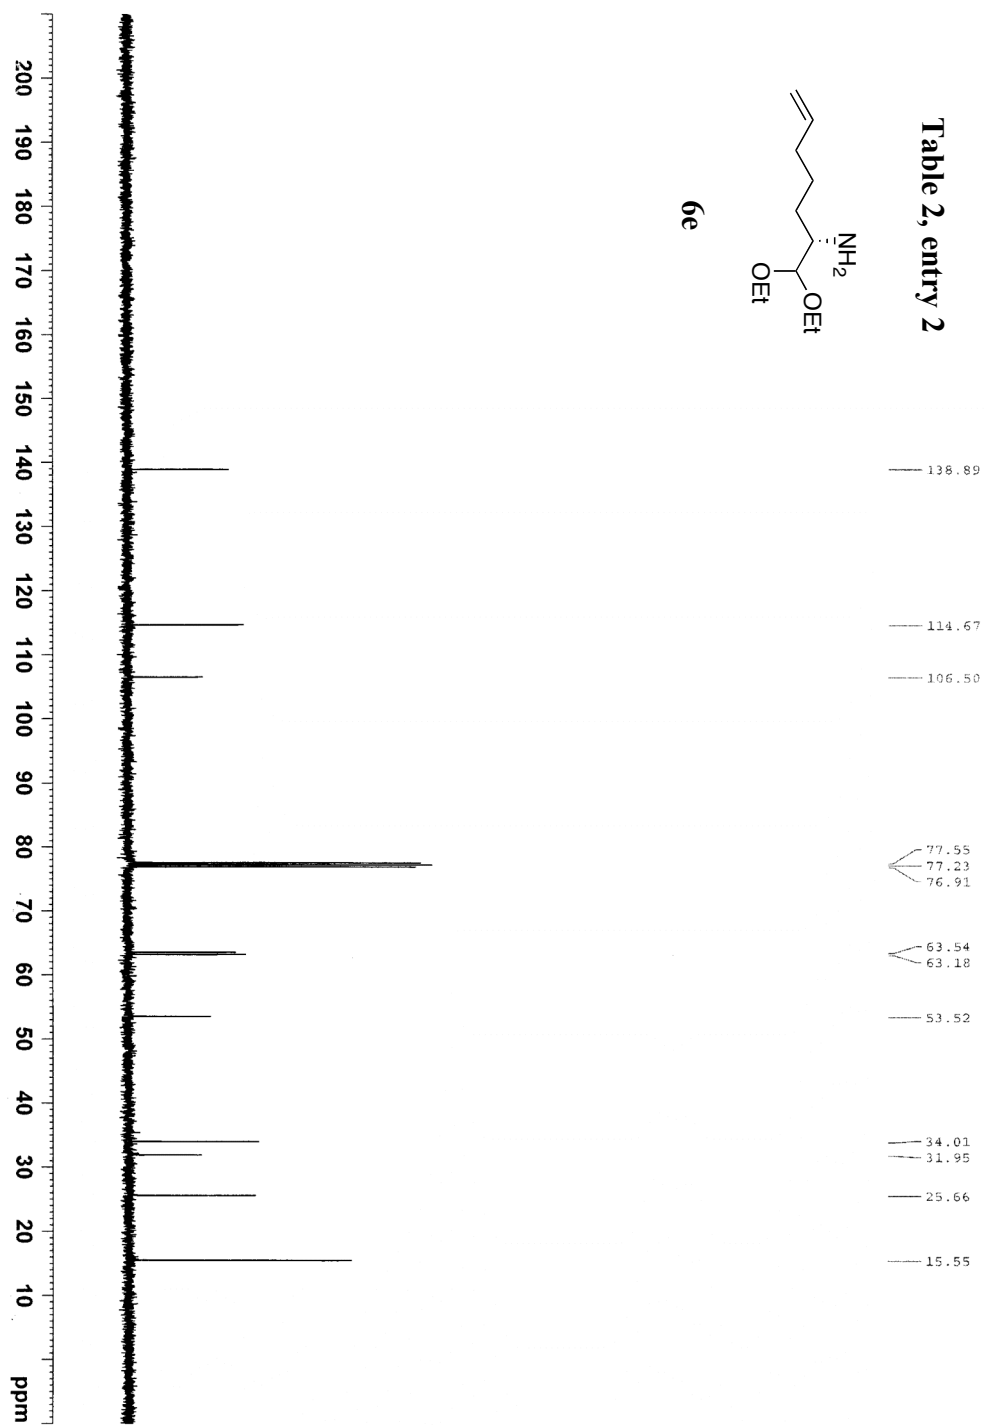

Table 2, entry 3

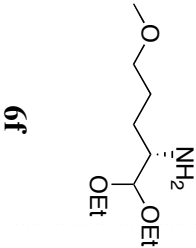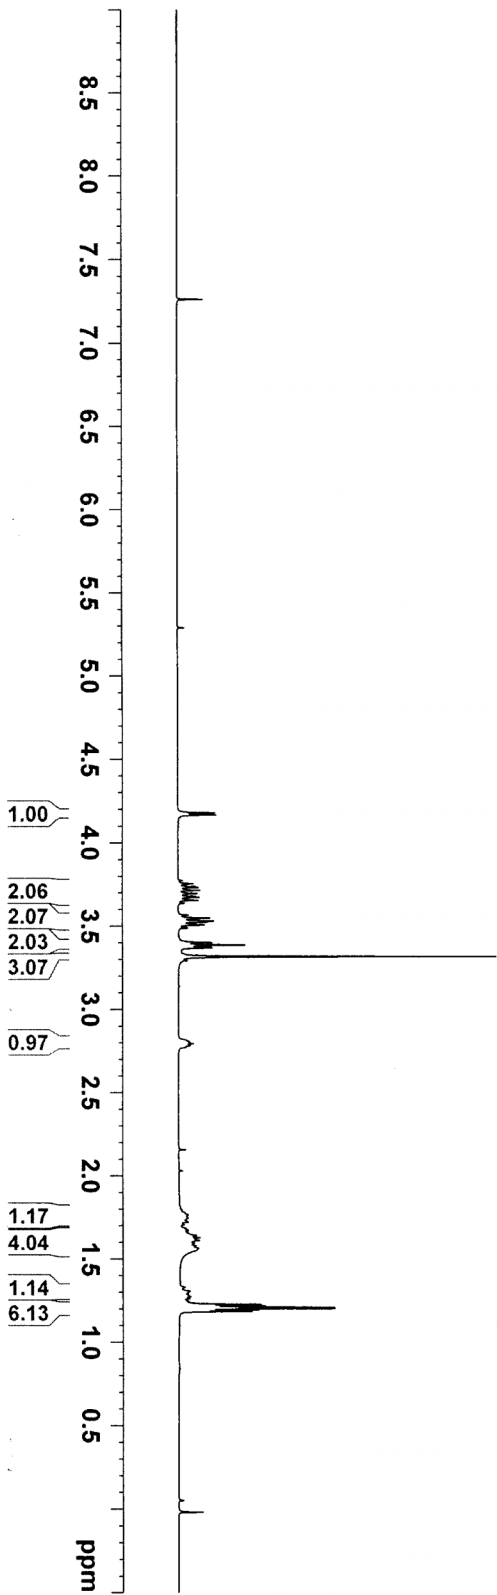

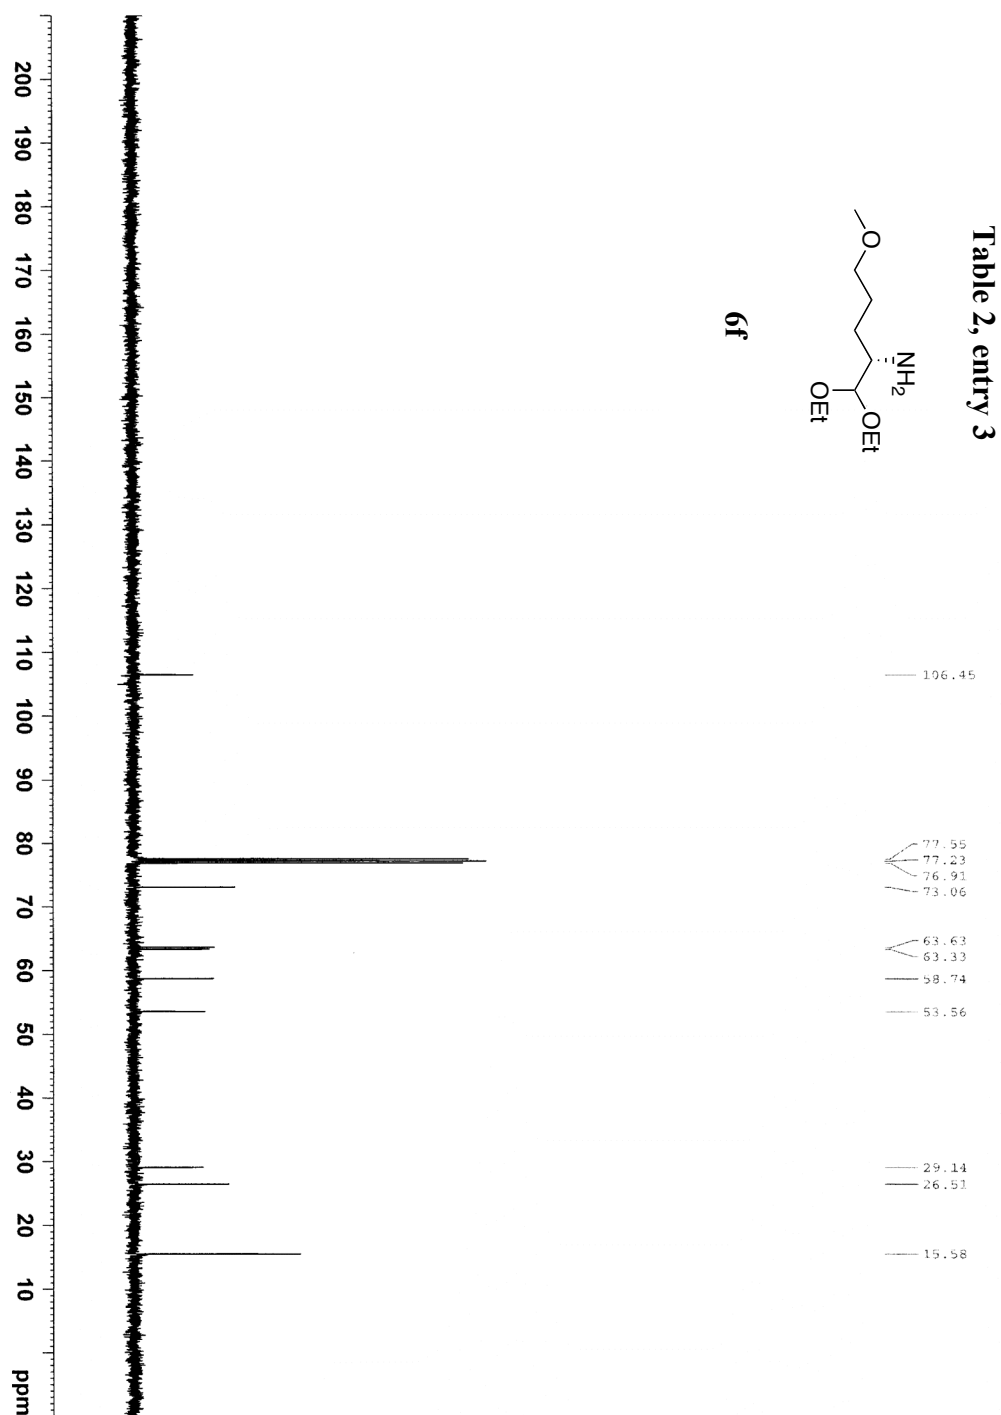

Table 2, entry 4

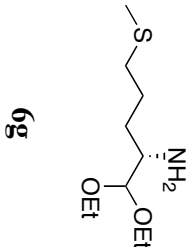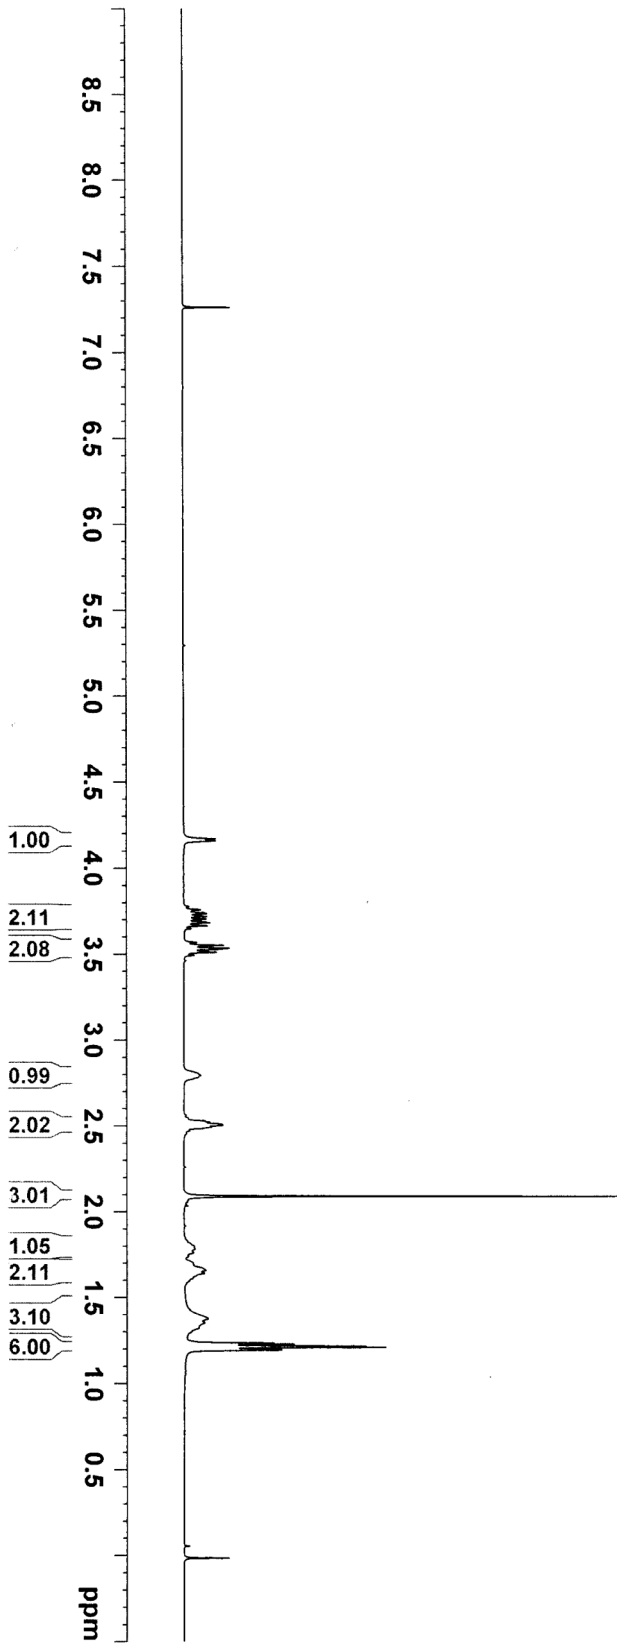



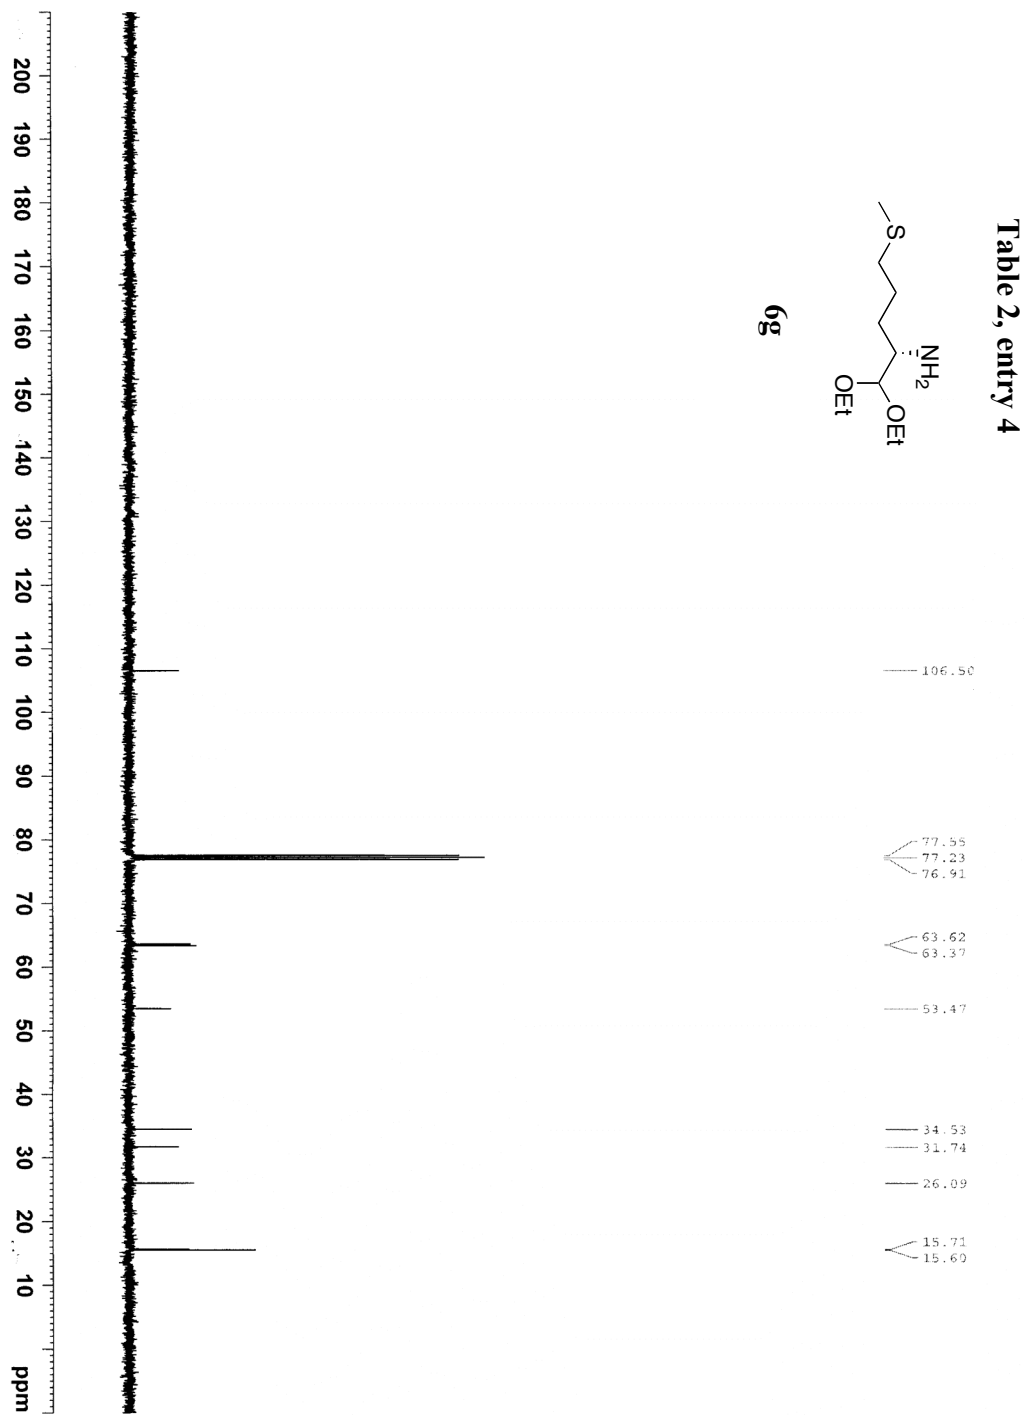

Table 2, entry 5

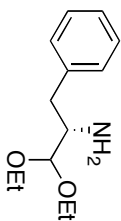

6h

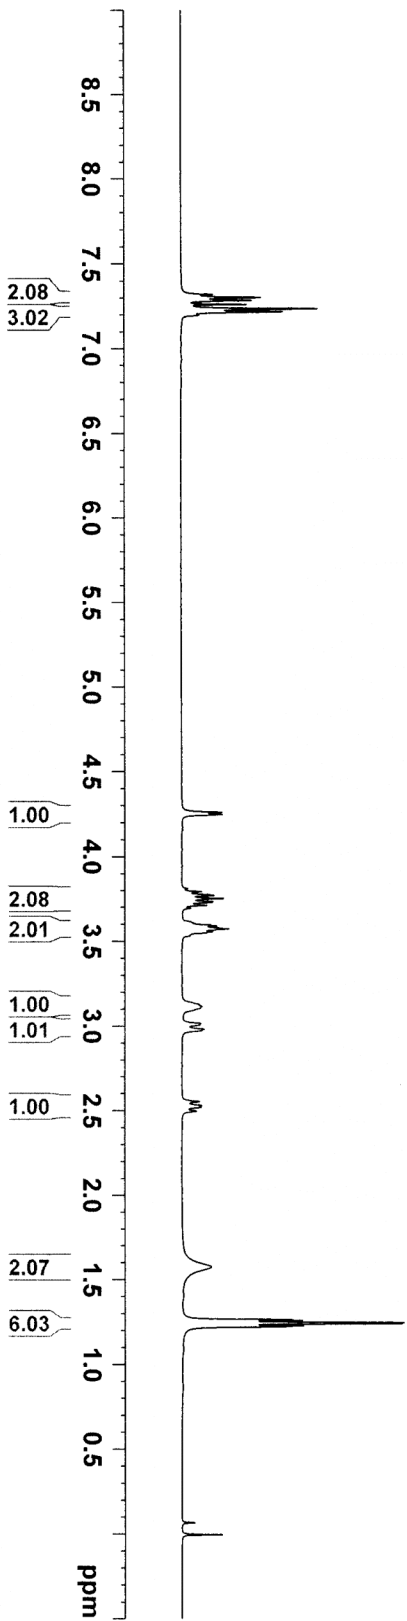

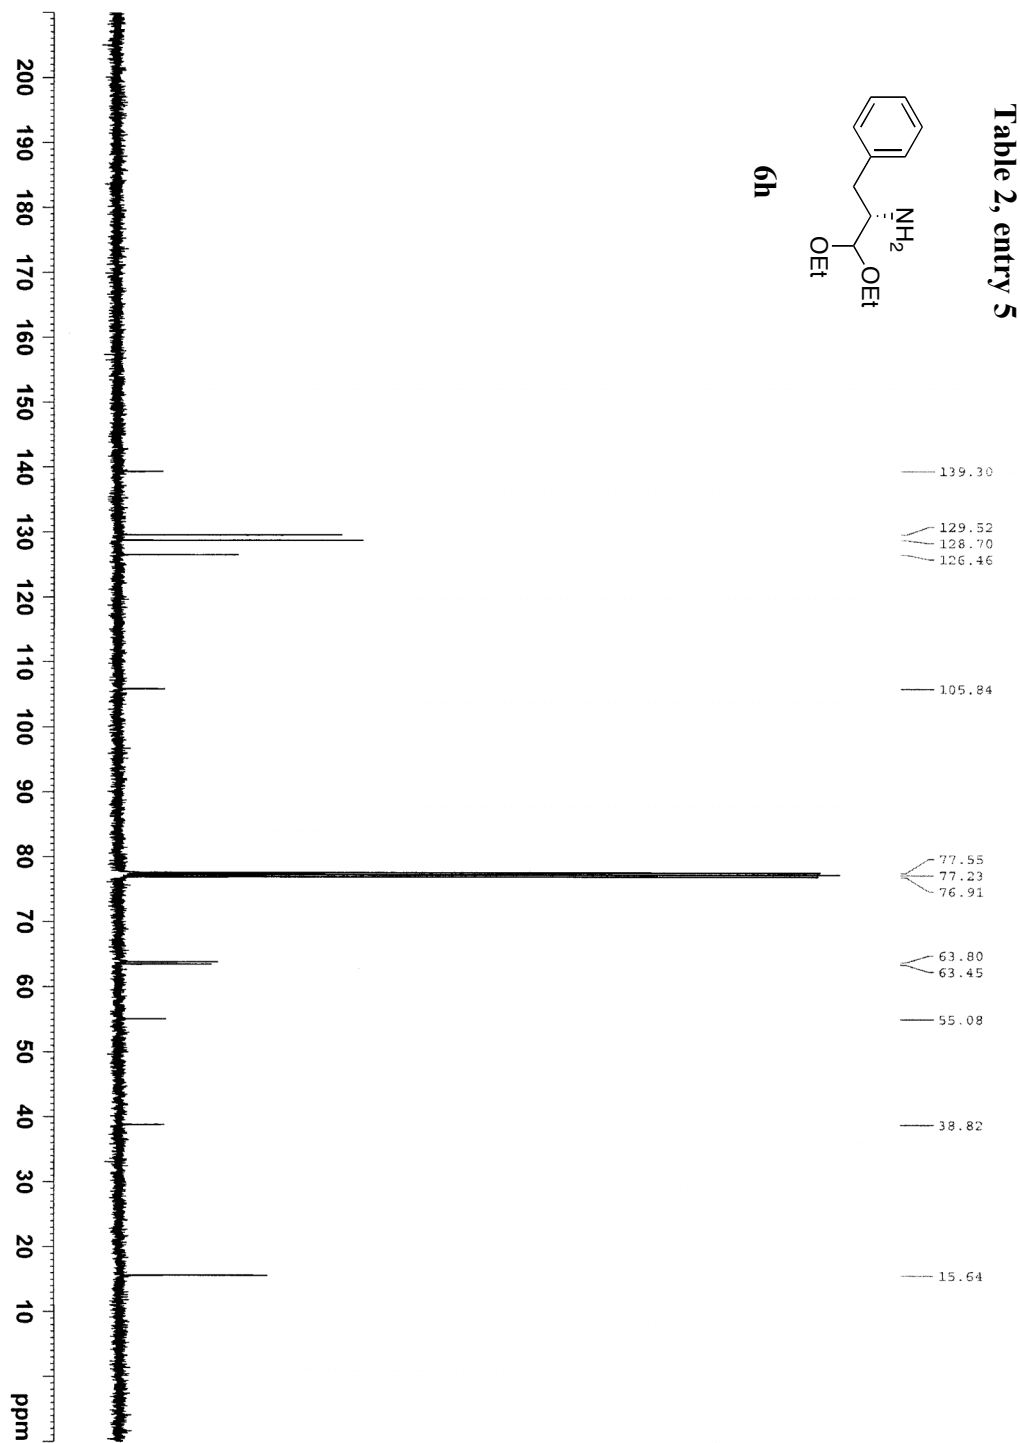

Table 2, entry 6

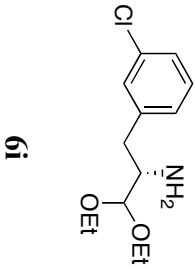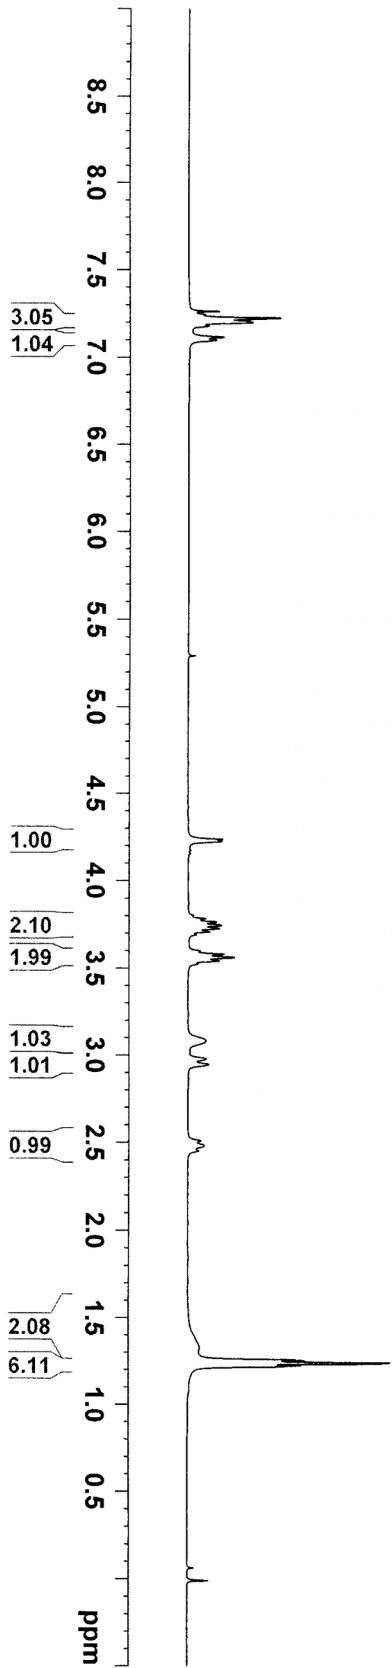

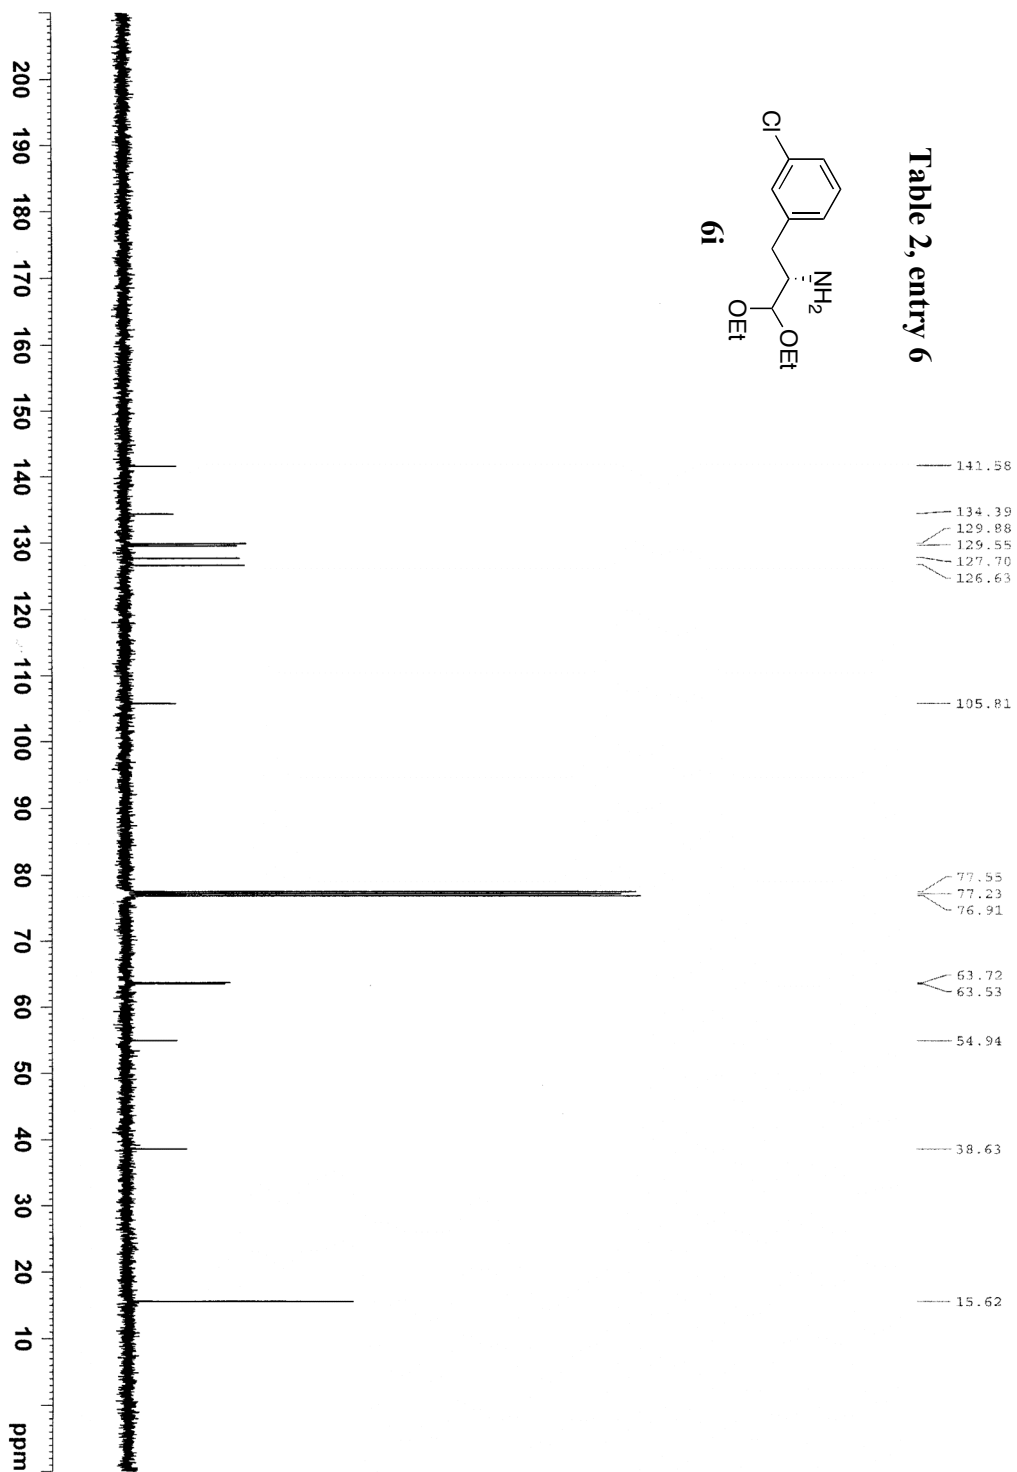

Table 2, entry 7

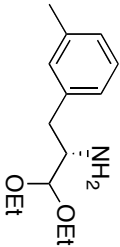

6j

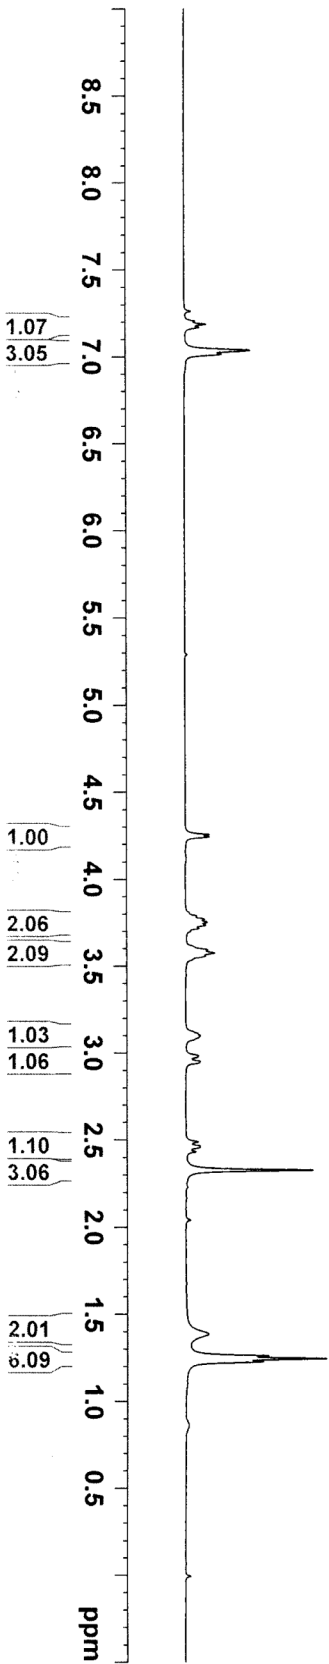

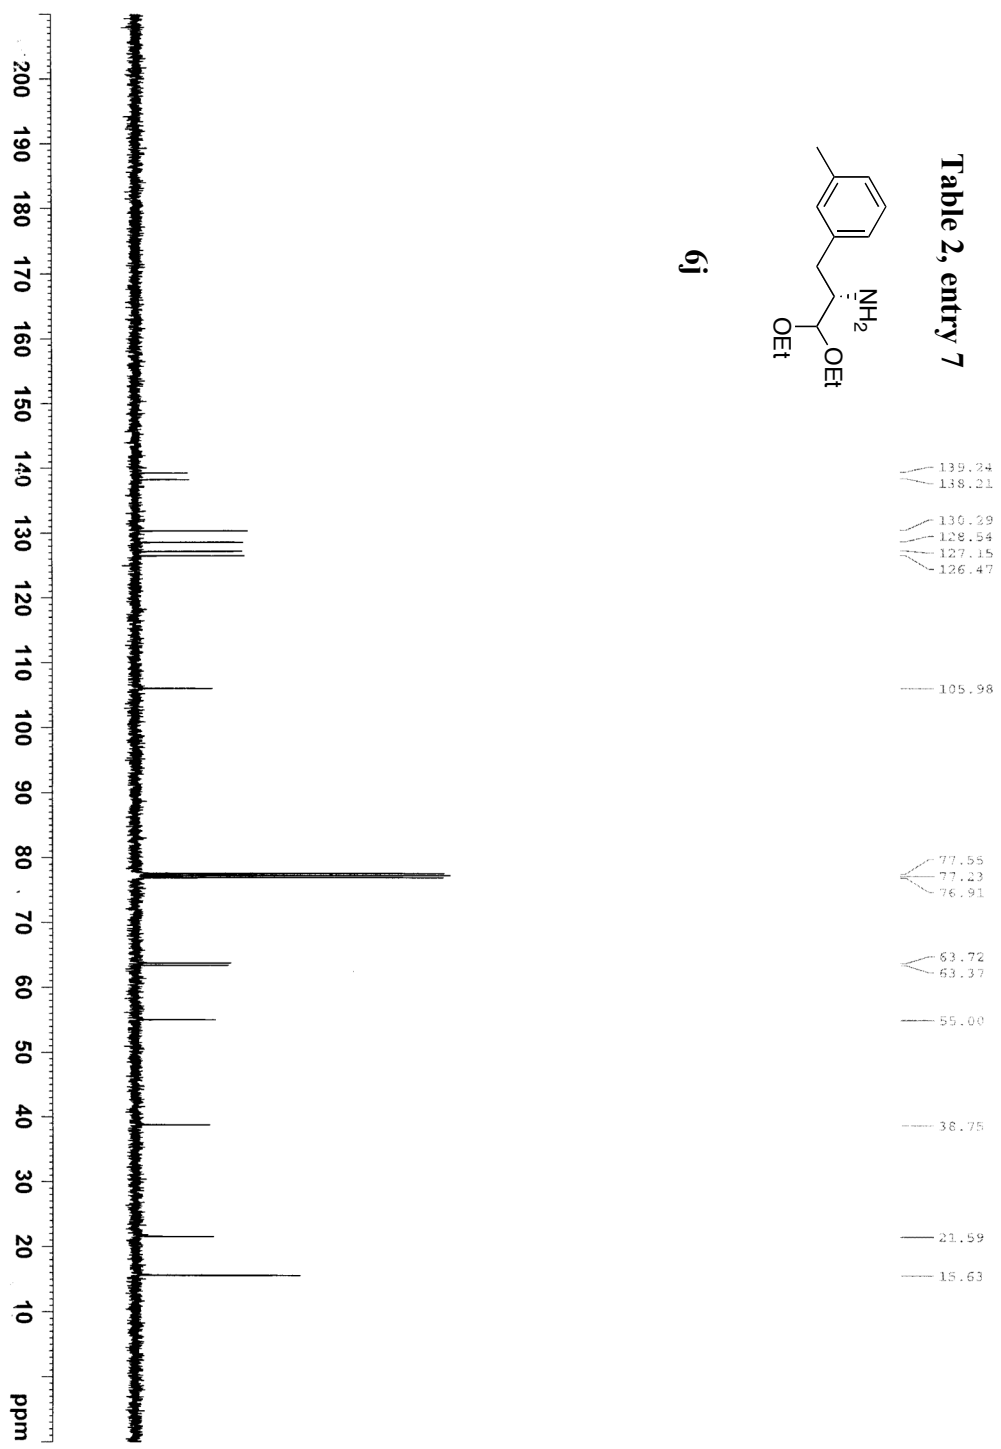

Table 2, entry 8

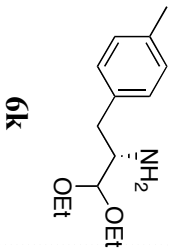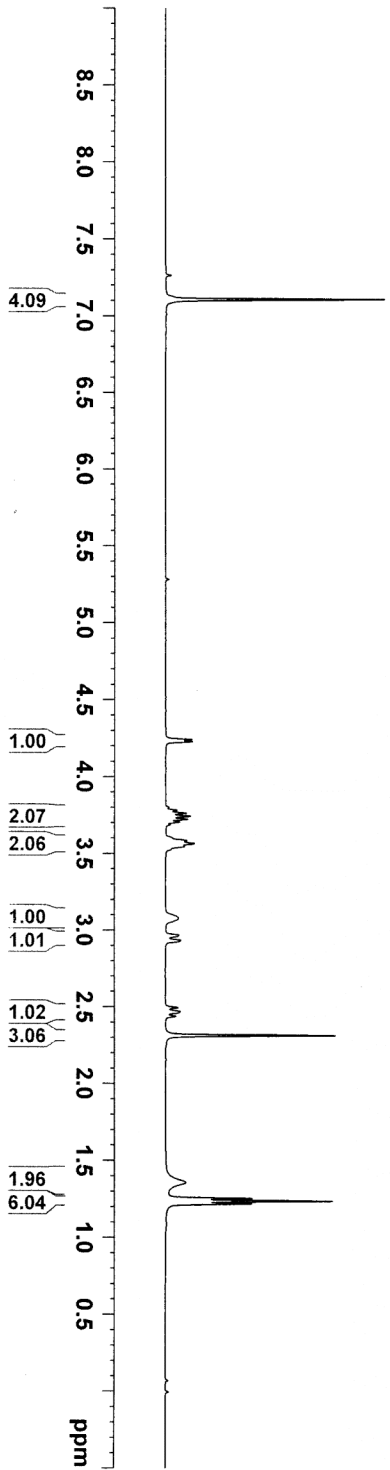



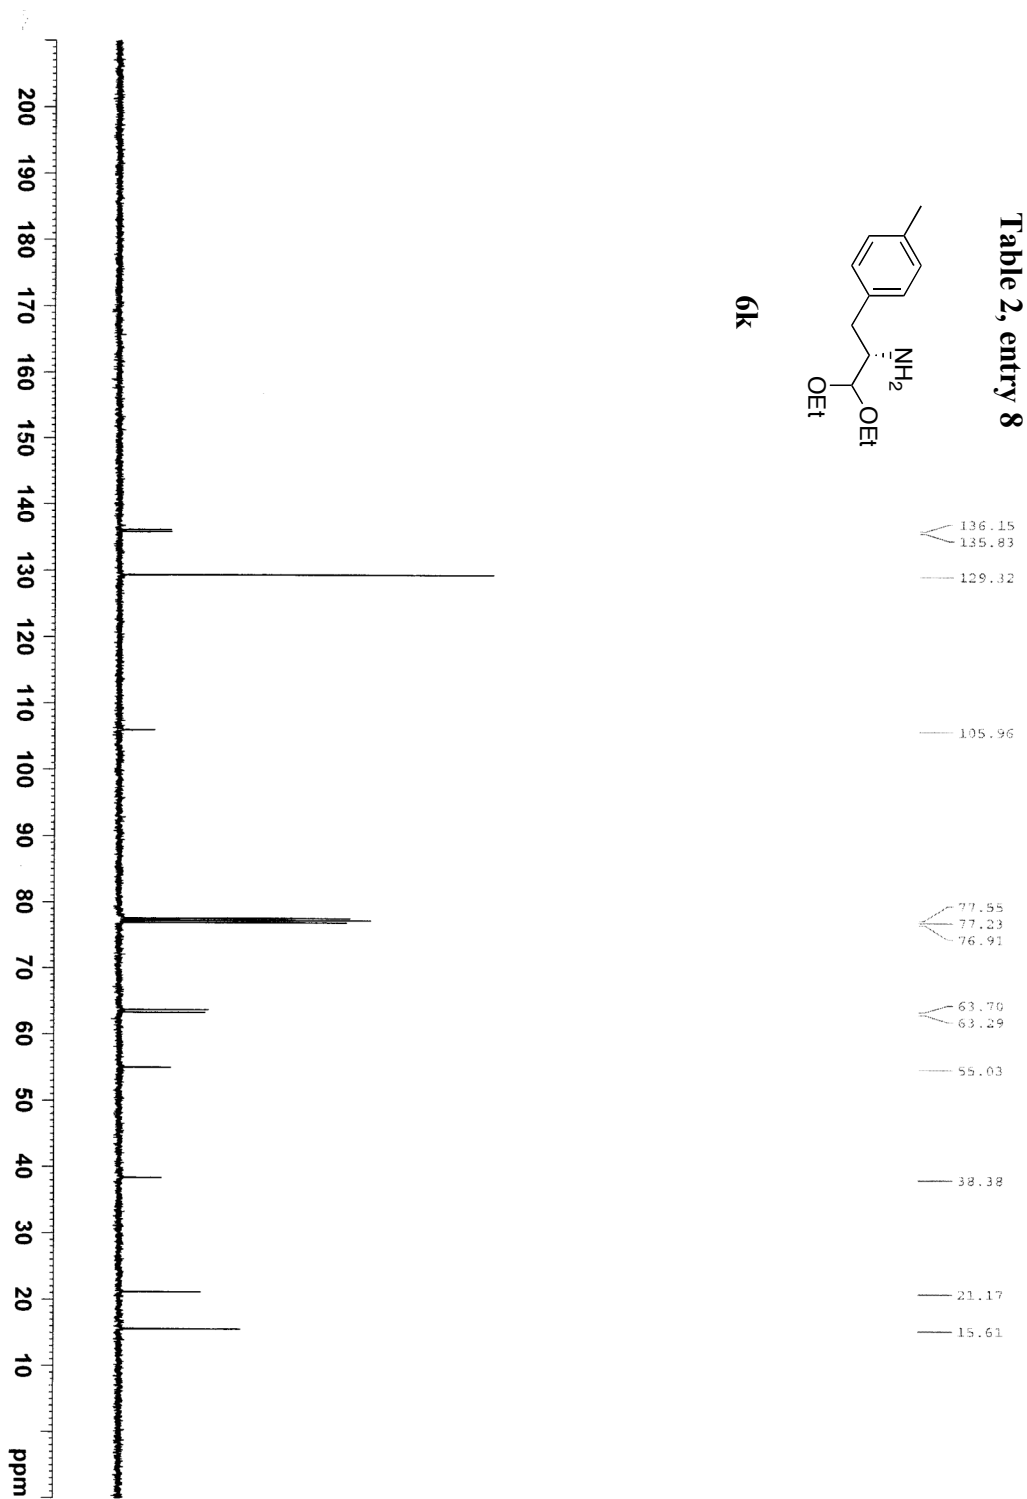

Table 2, entry 9

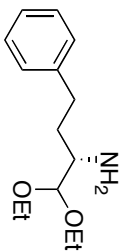

61

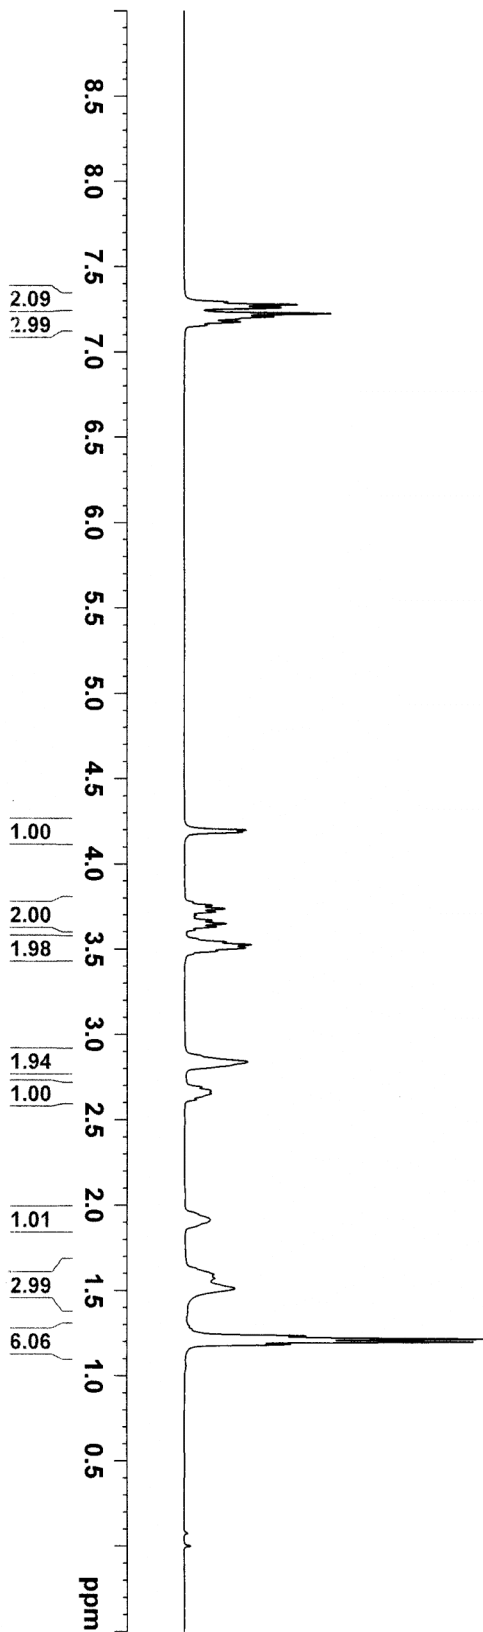

Table 2, entry 9

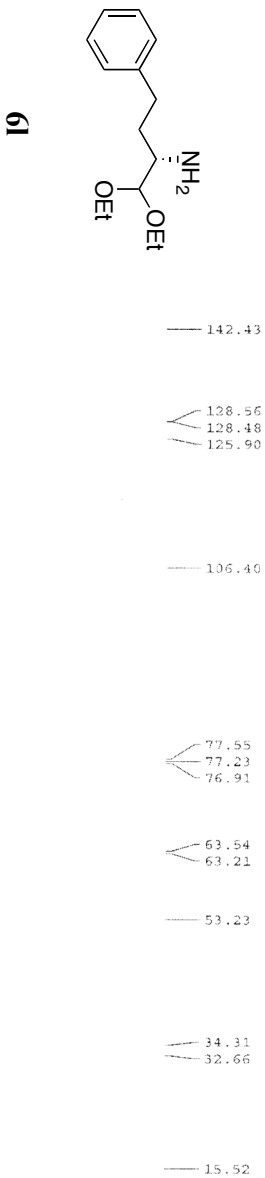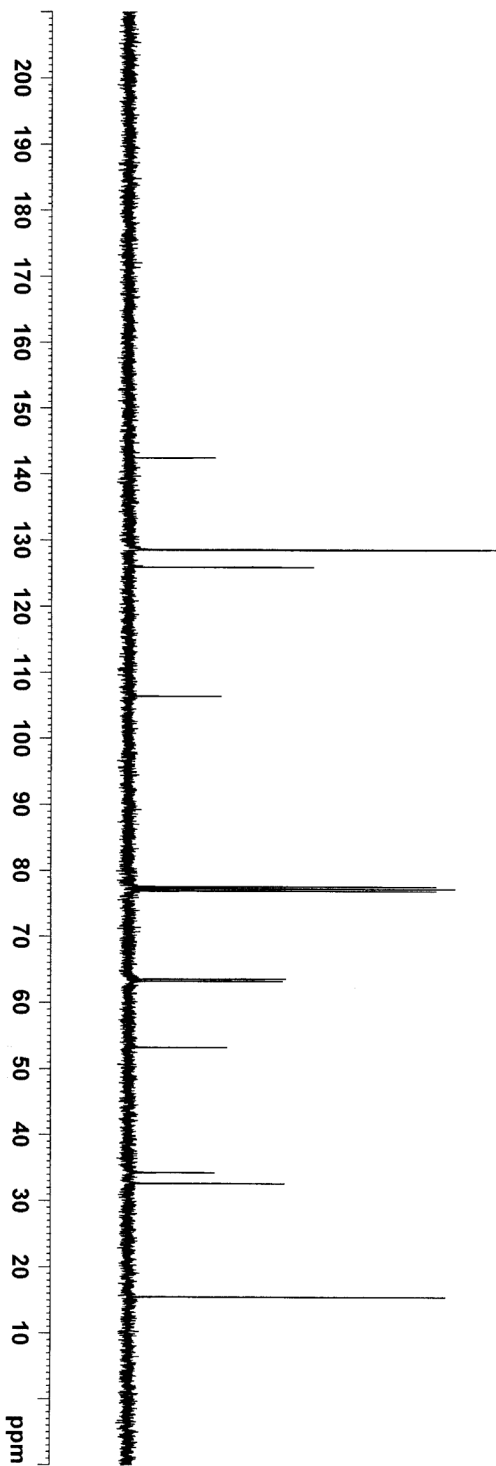

Table 2, entry 10

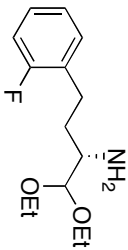

6m

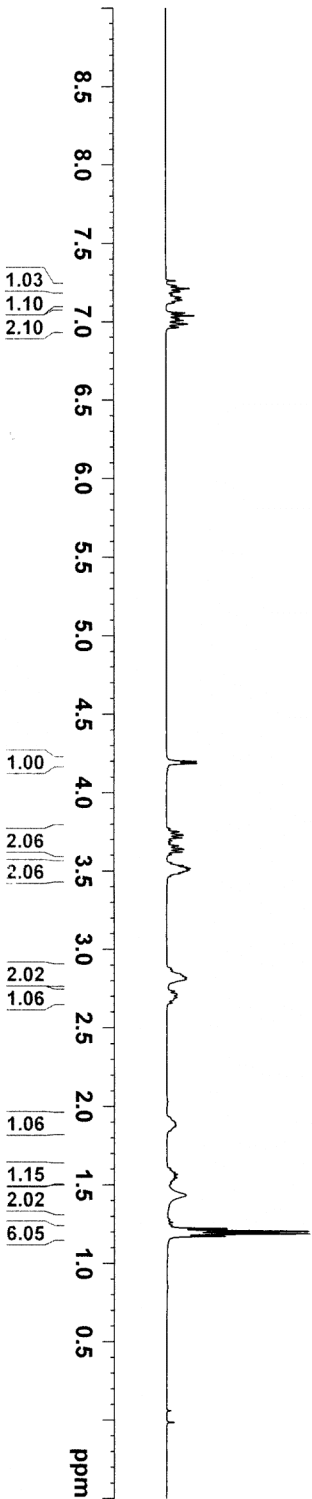

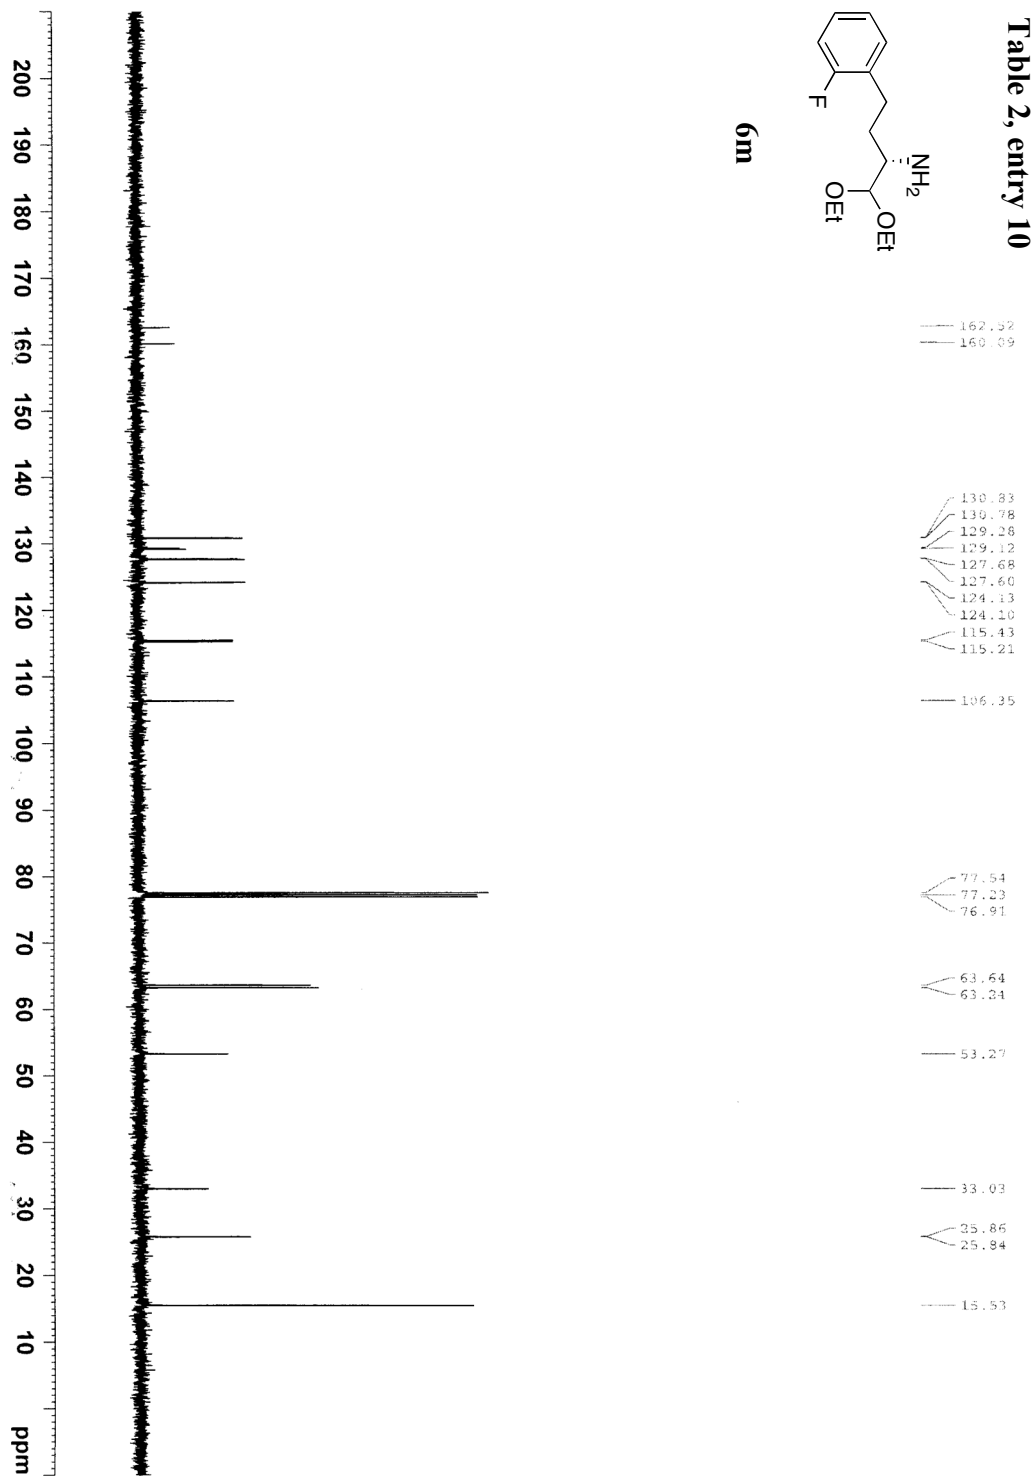

Table 2, entry 11

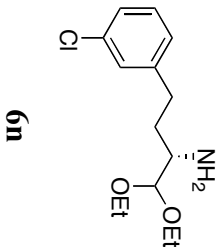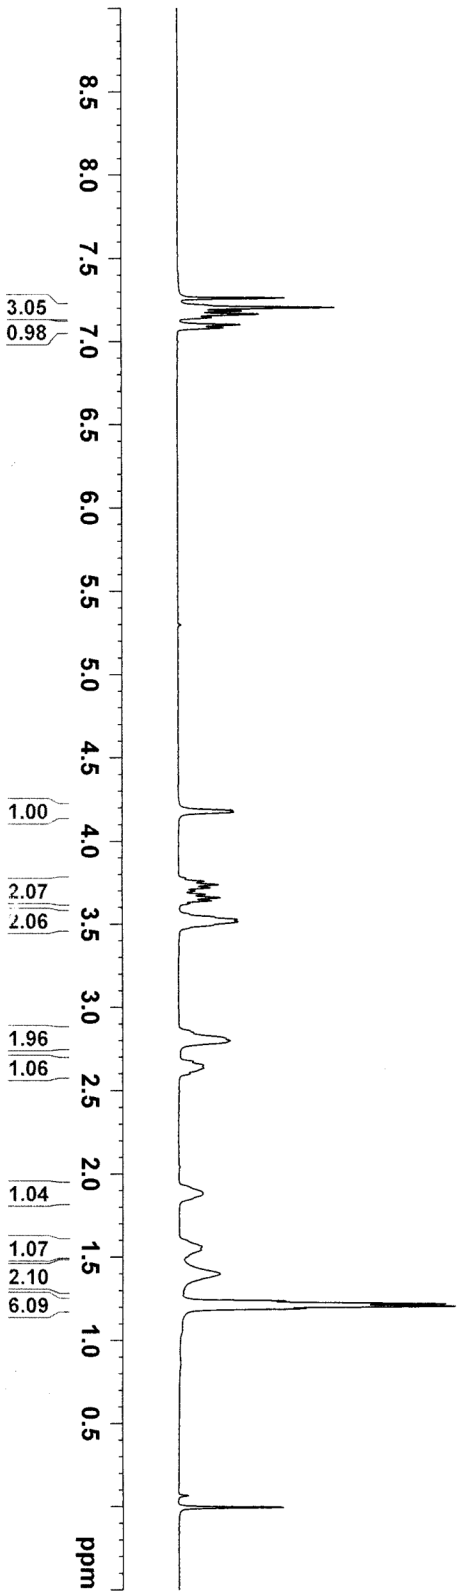

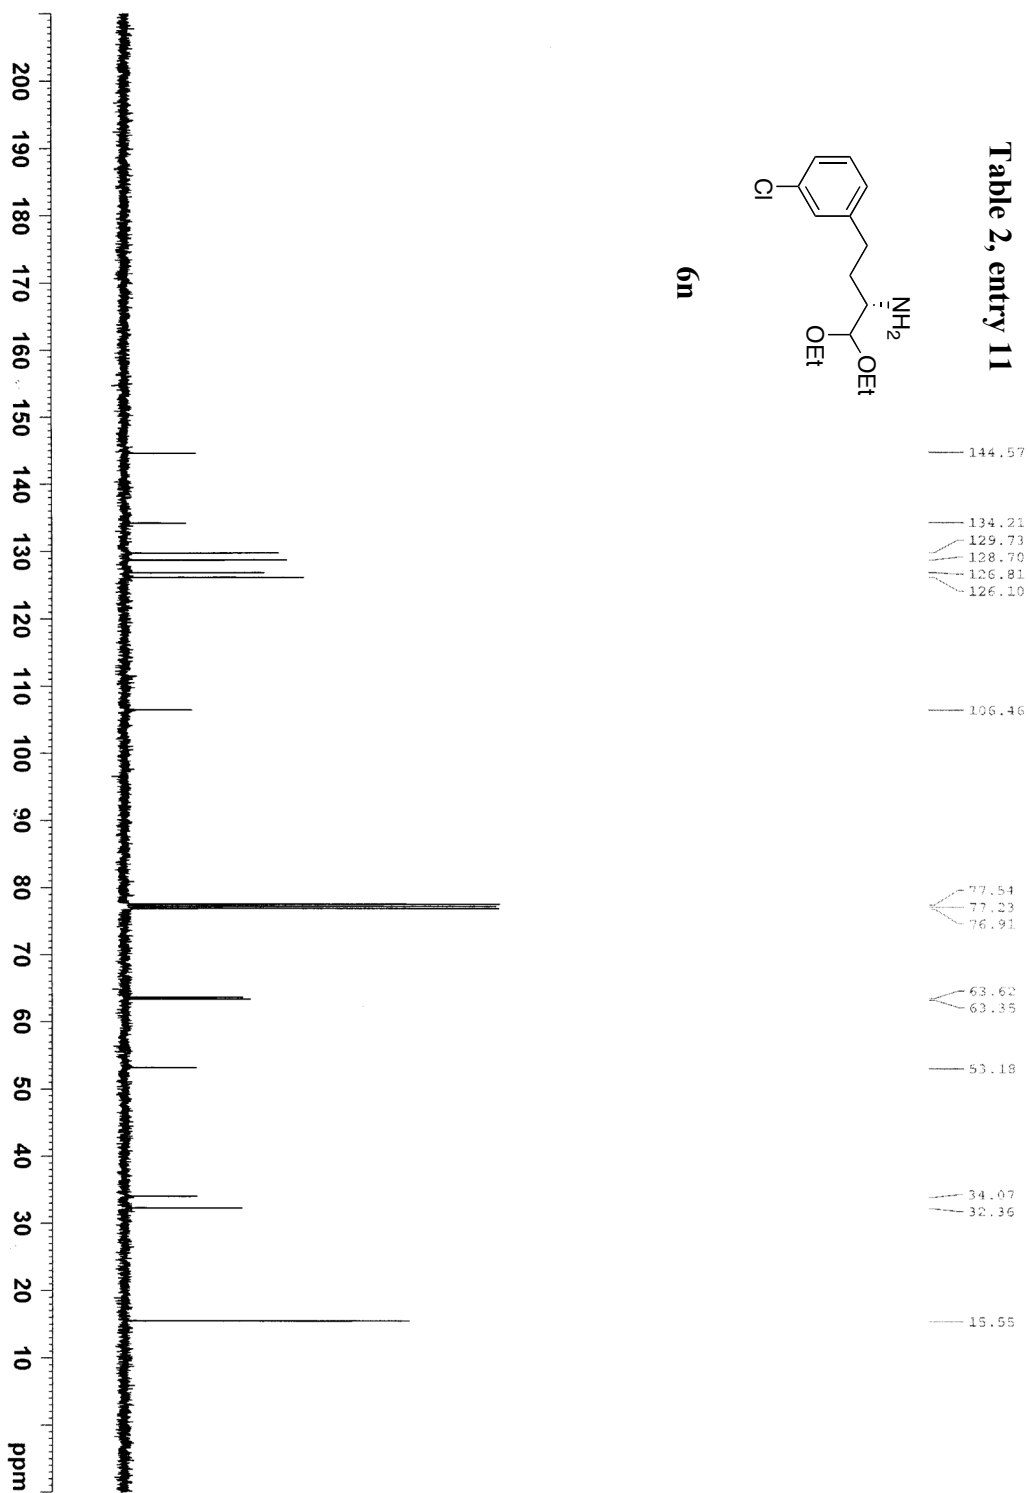

Table 2, entry 12

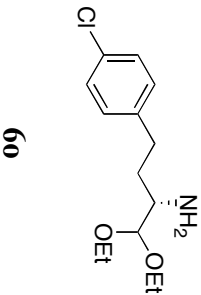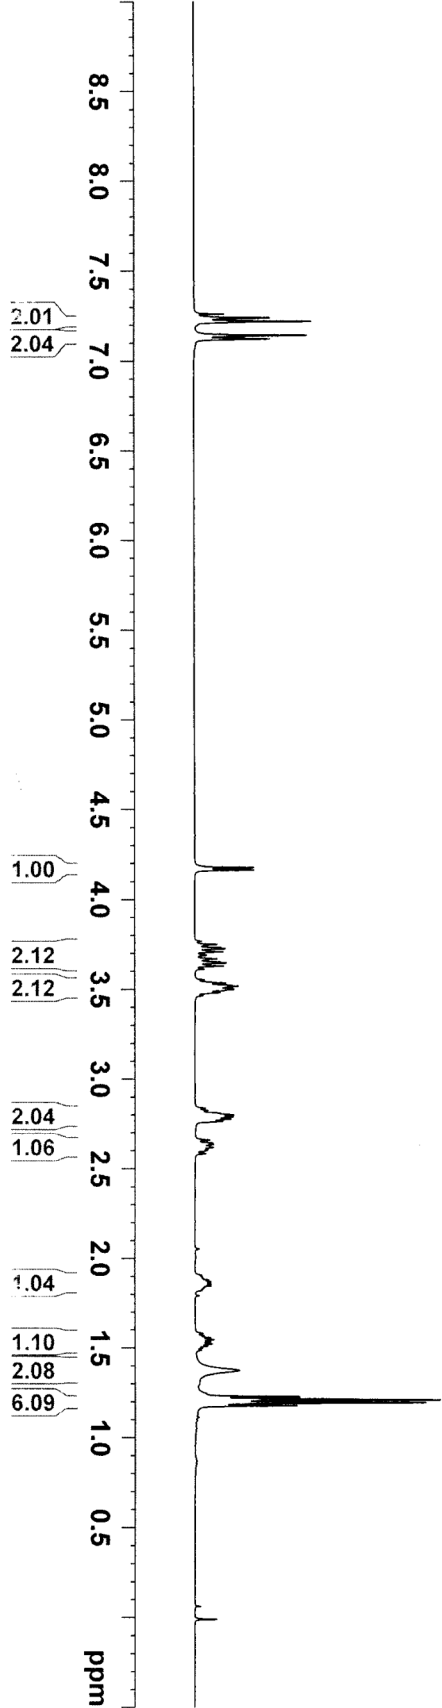



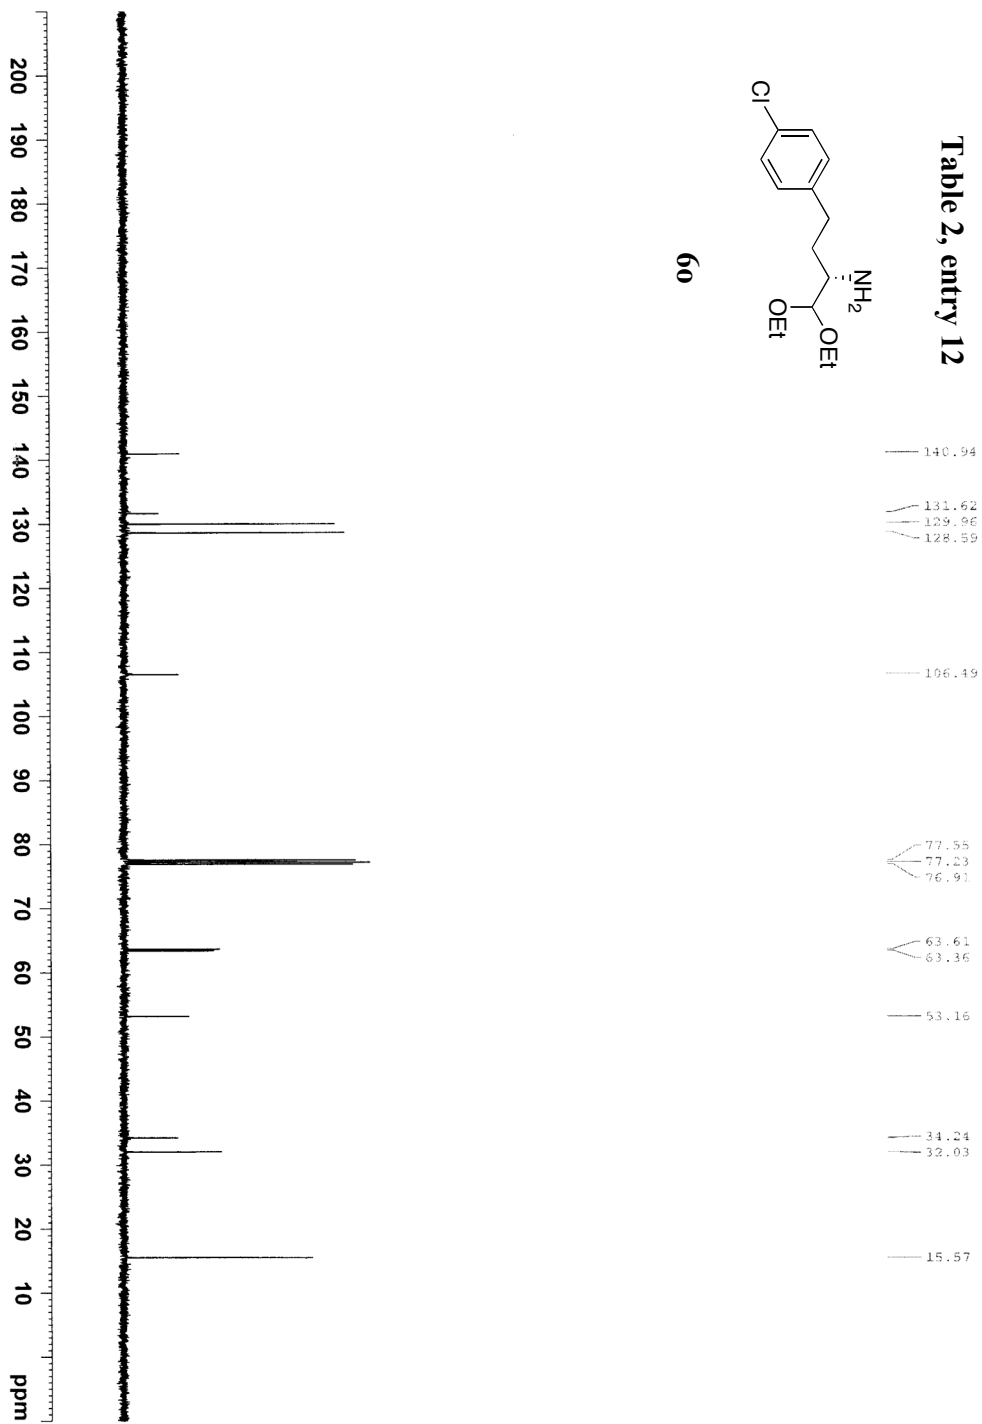

Table 2, entry 13

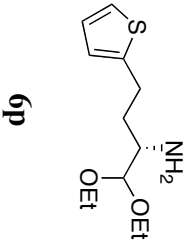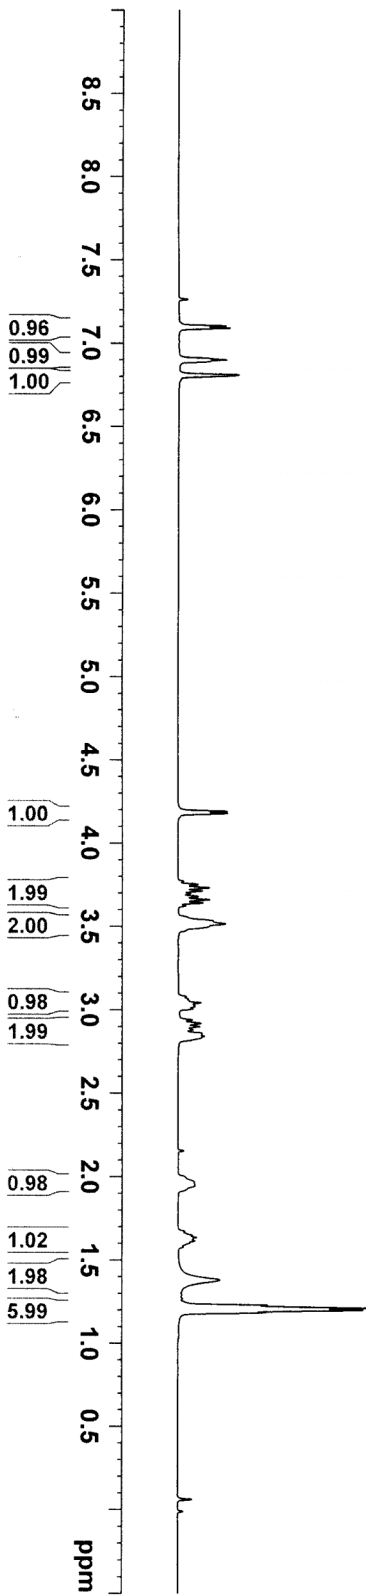

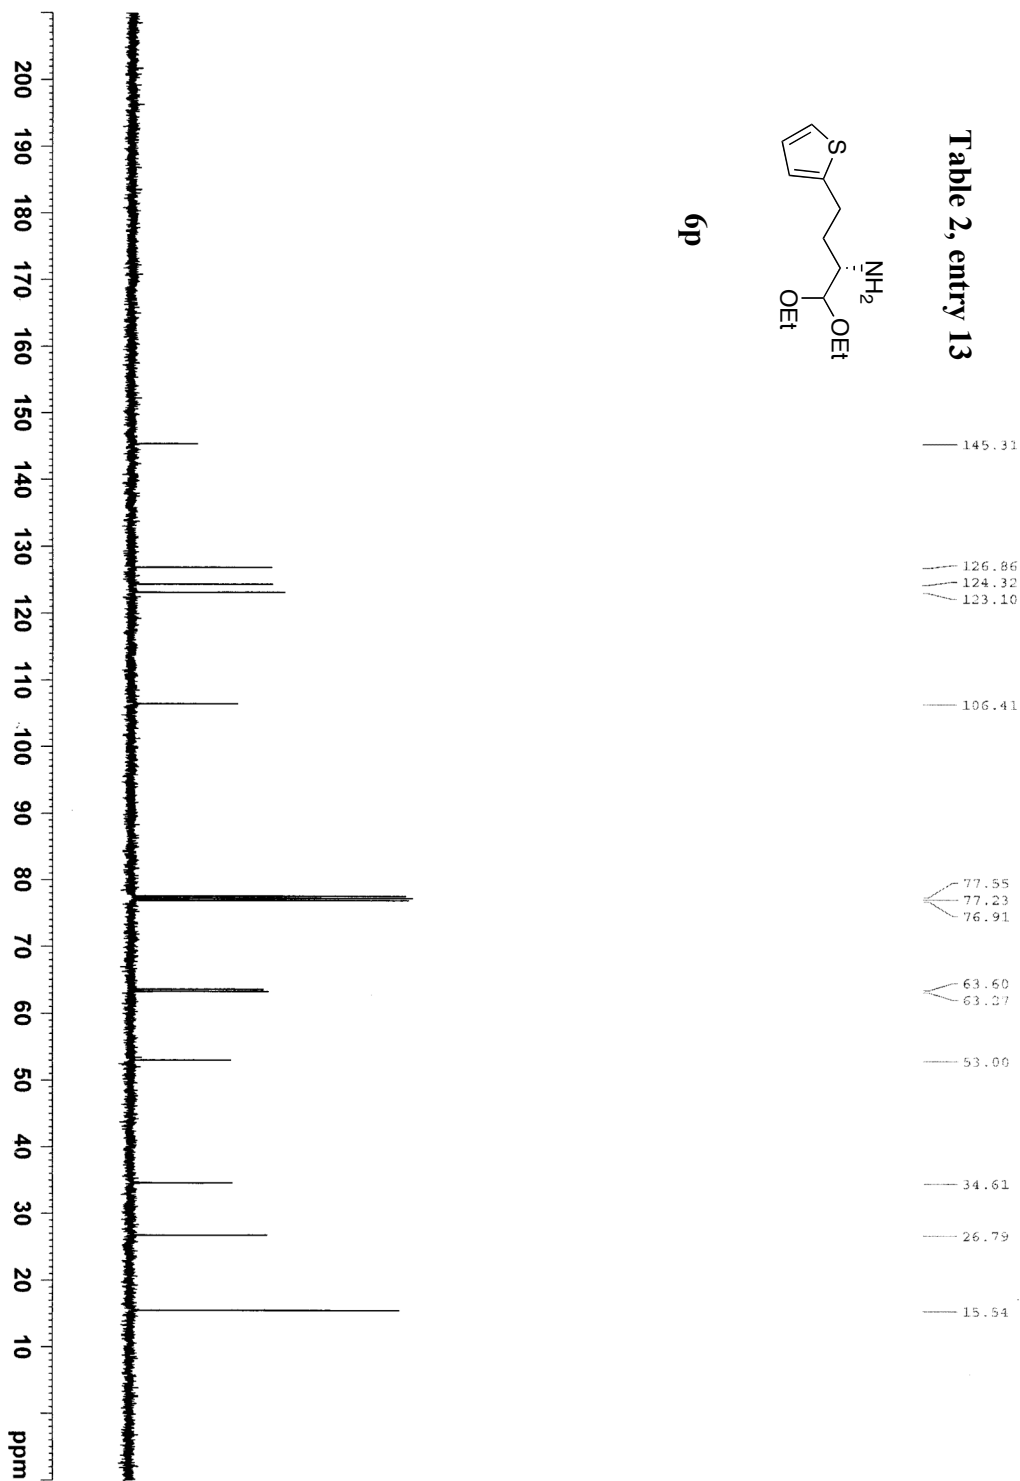

Table 2, entry 14

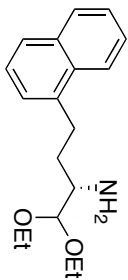

6q

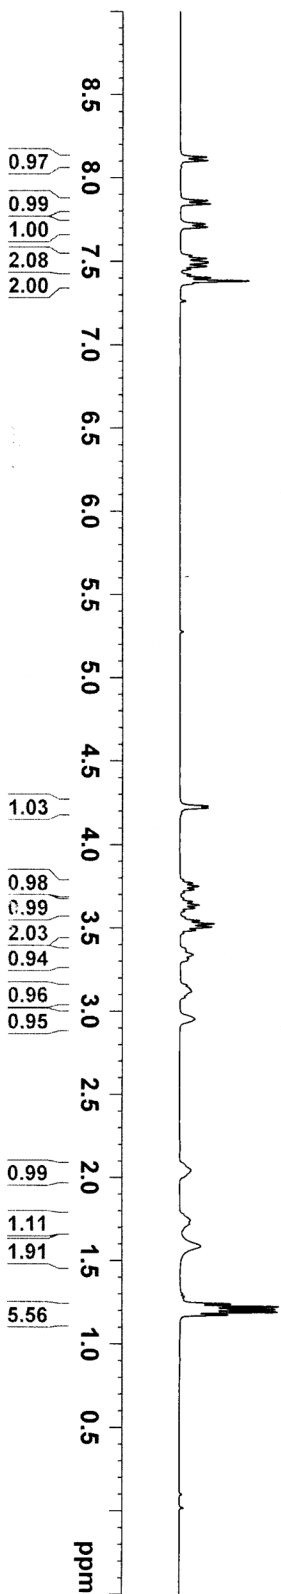

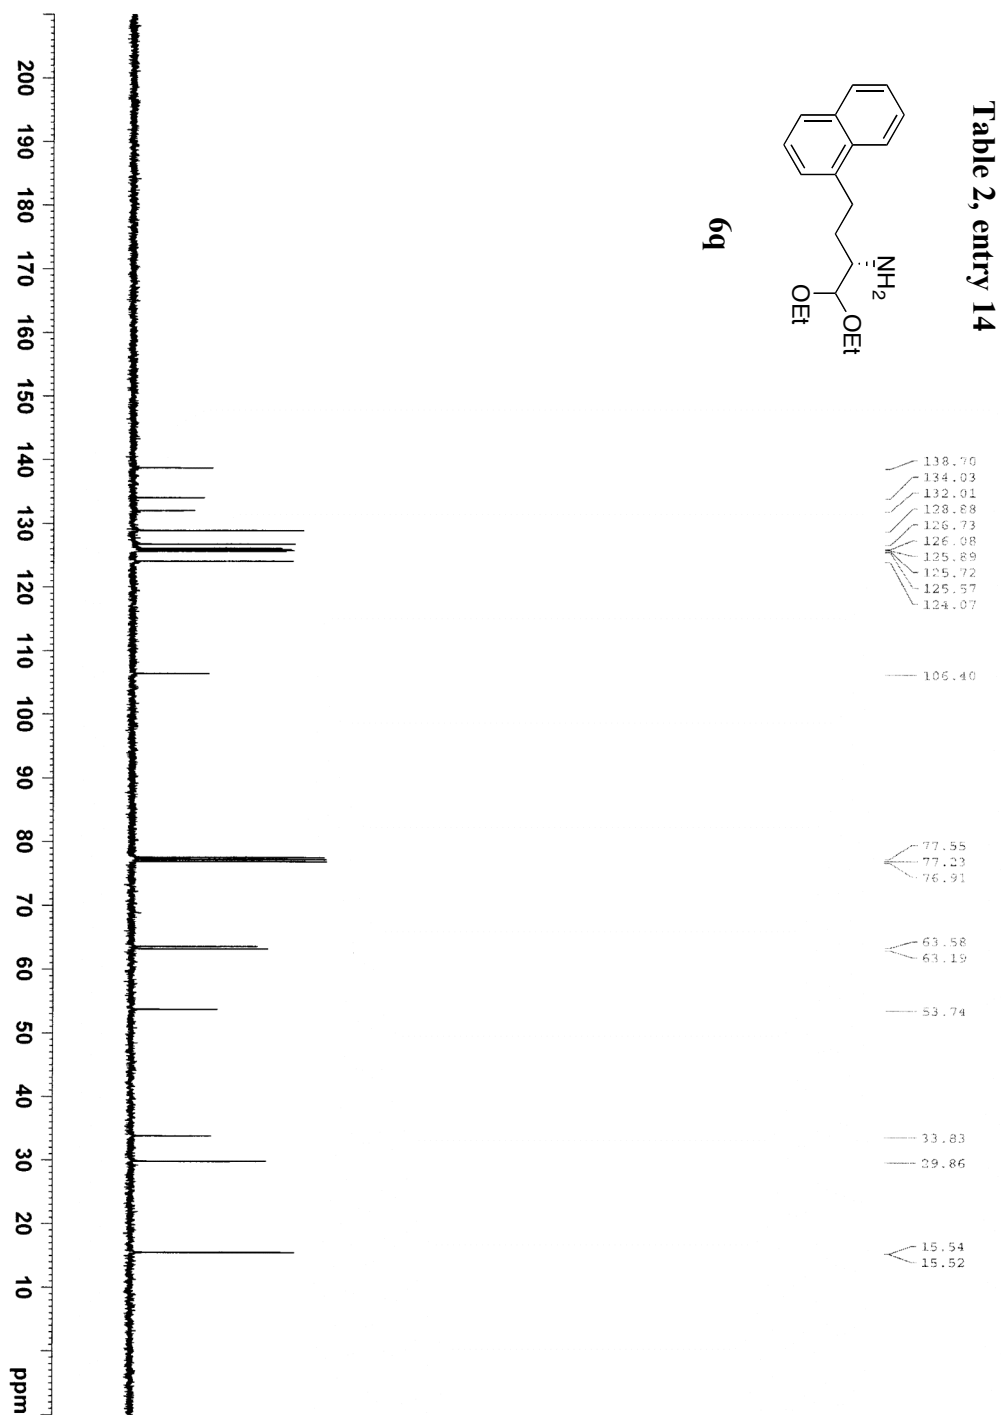

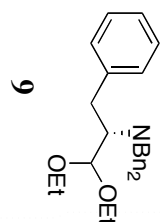

Scheme 2

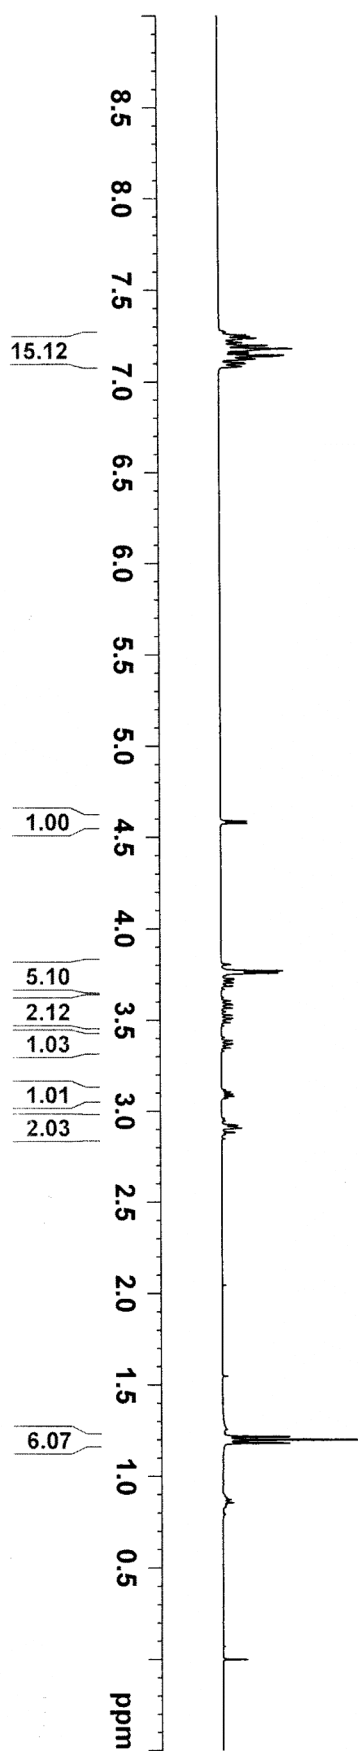

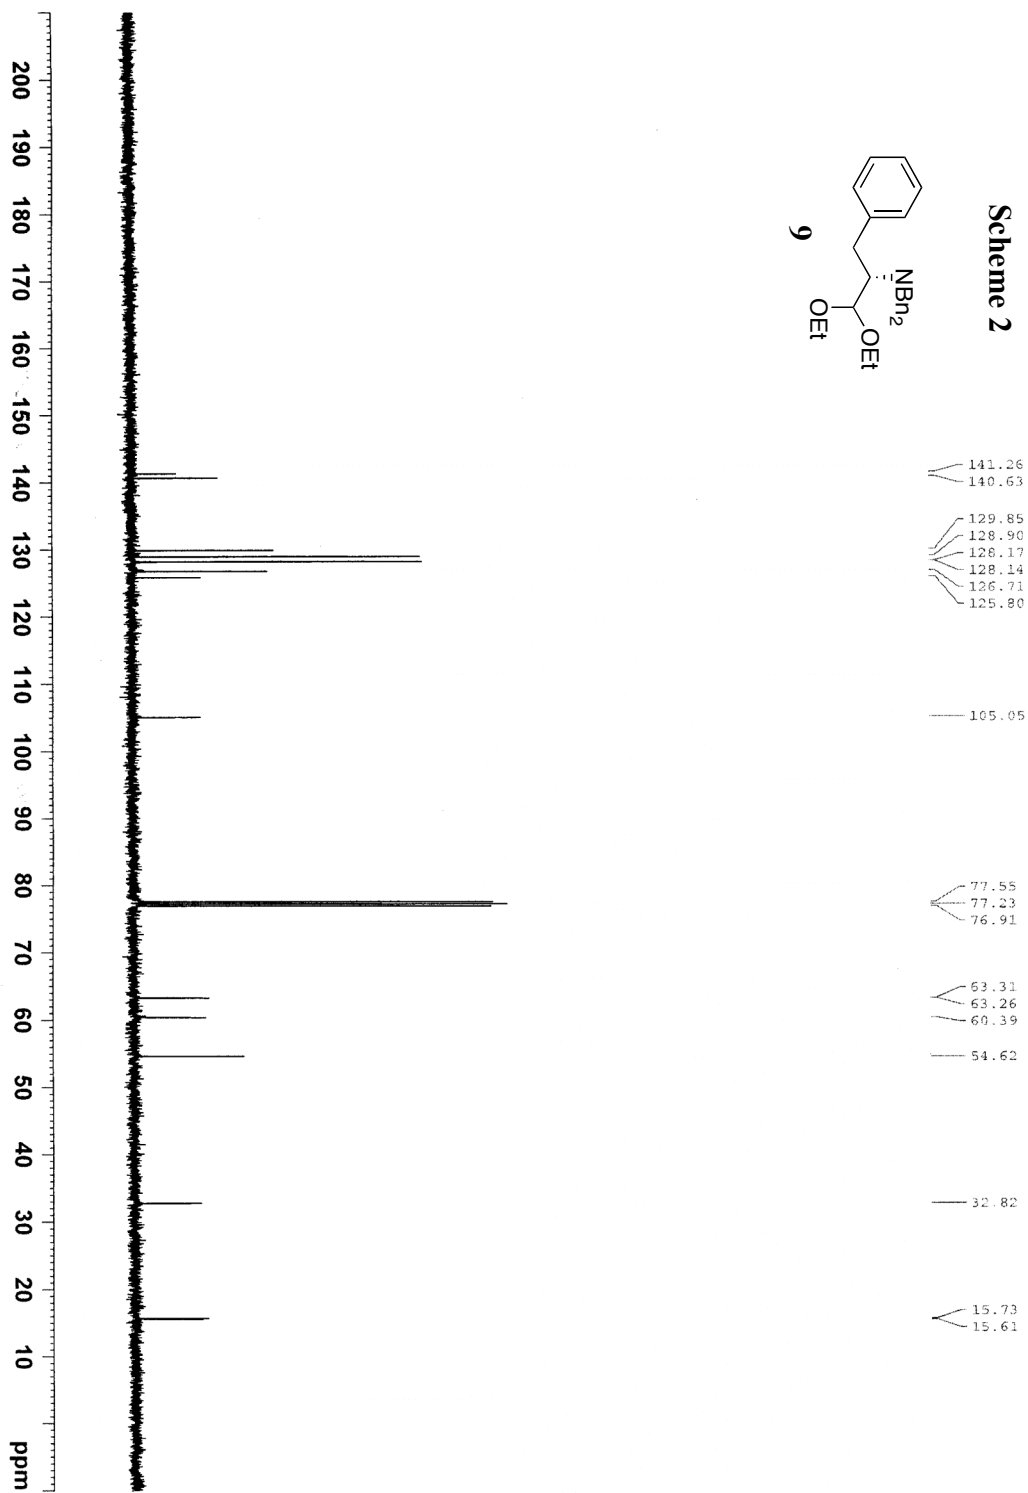

Scheme 3

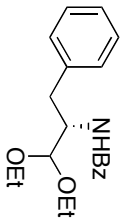

10h

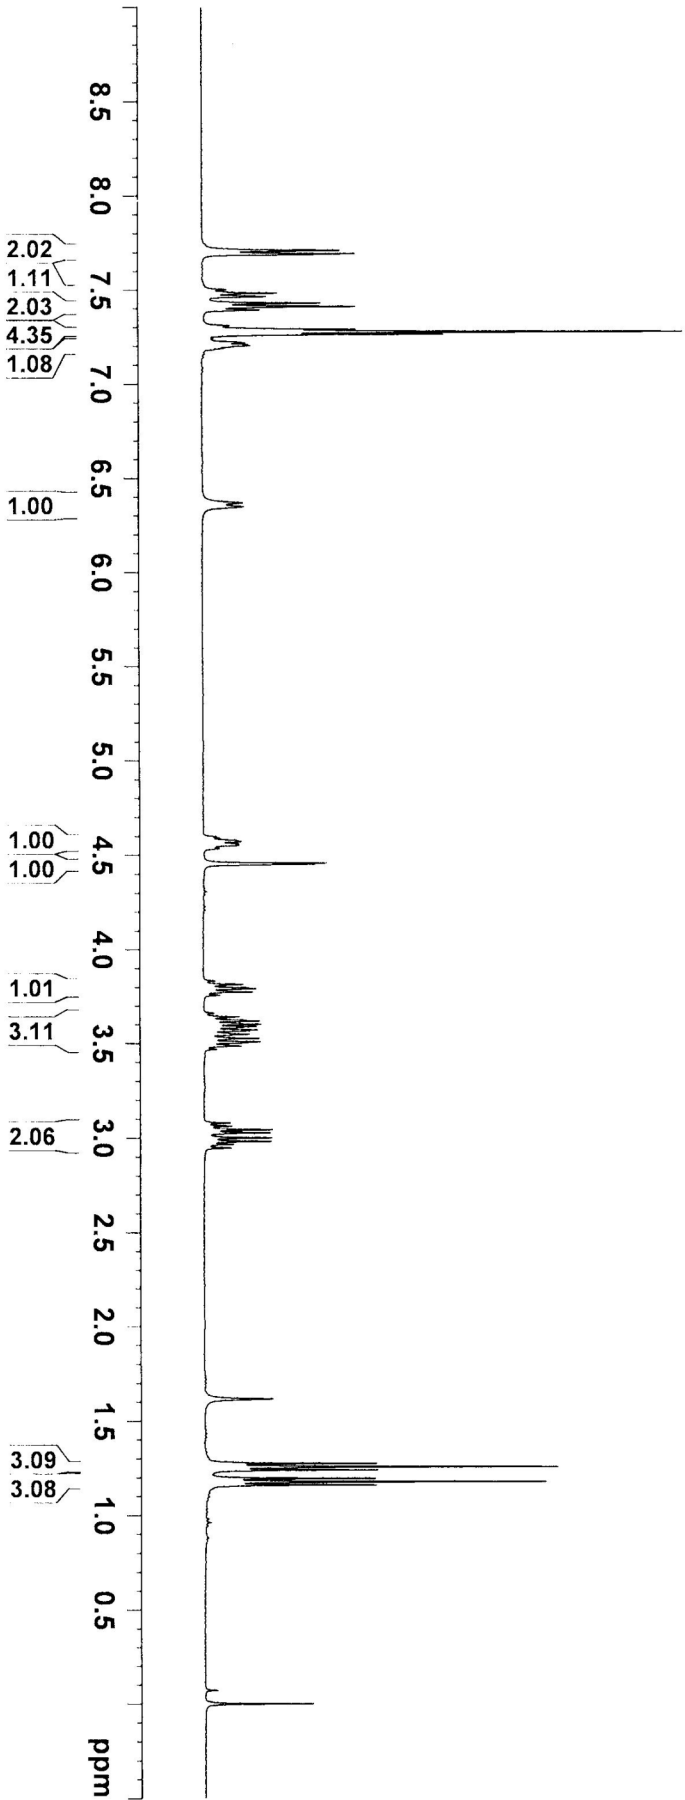



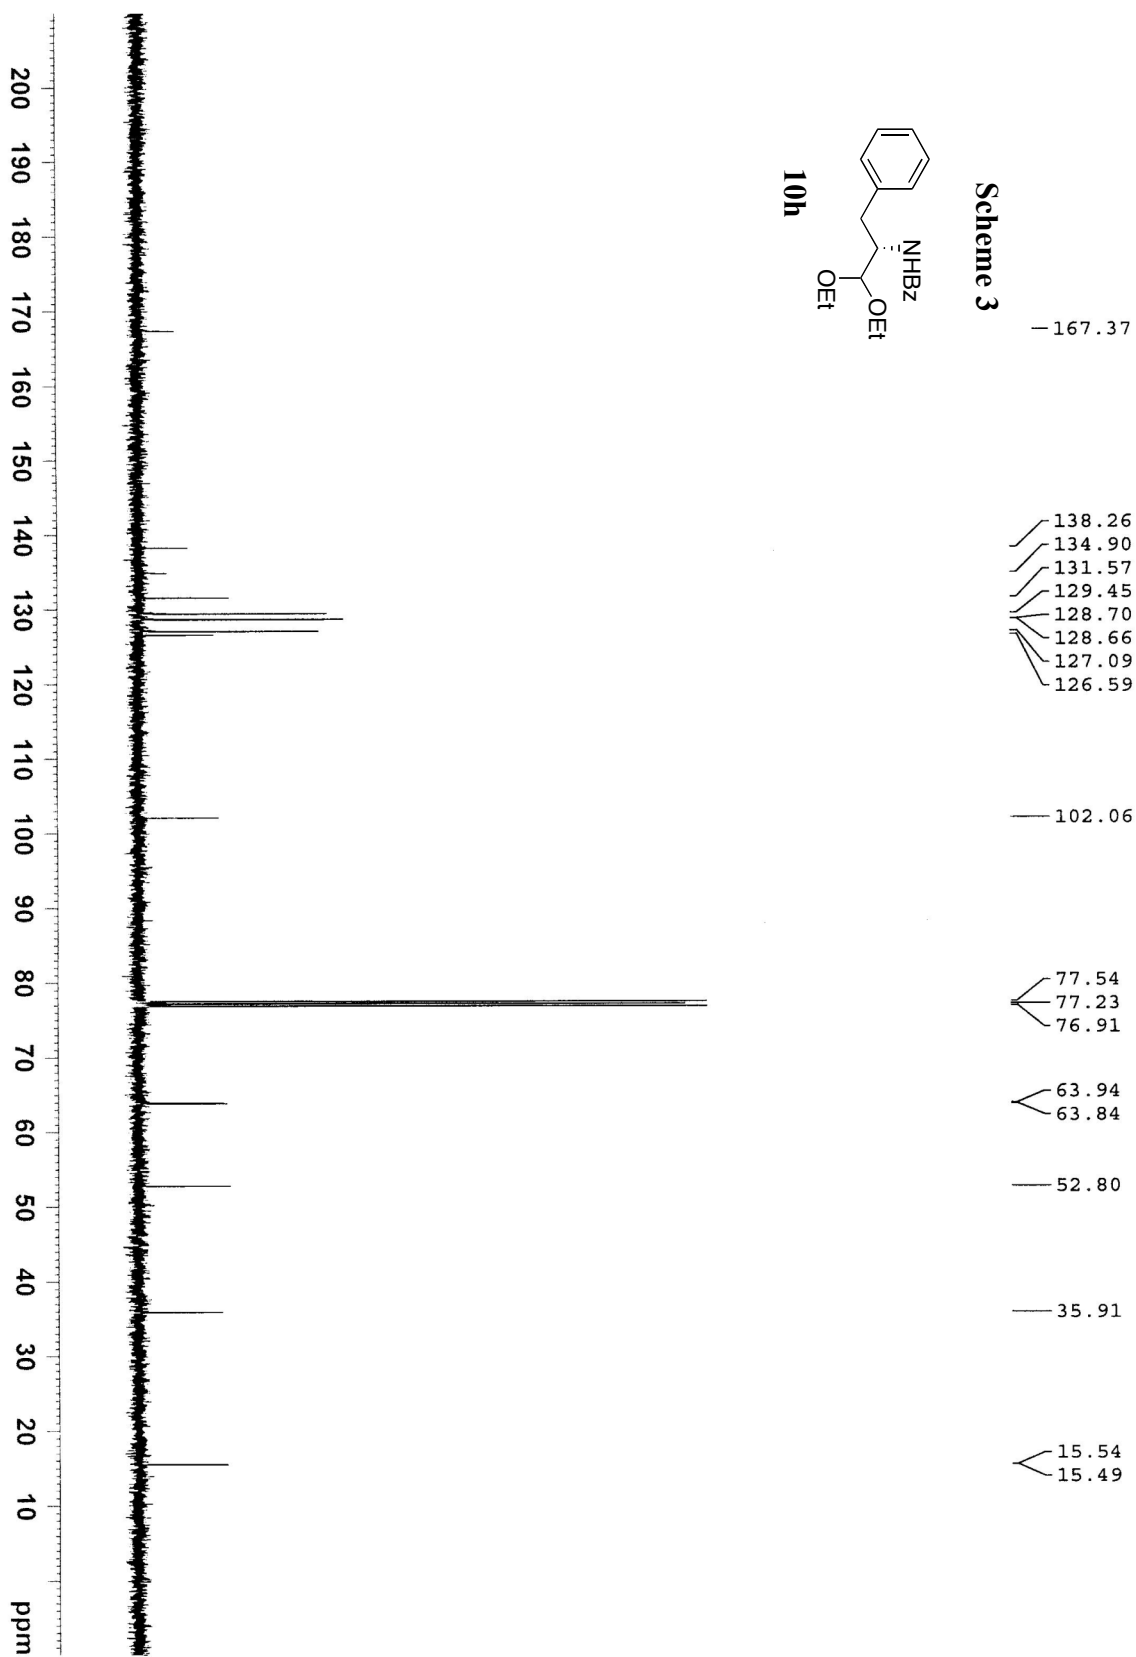

Scheme 3

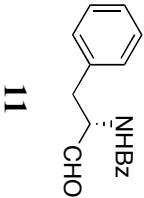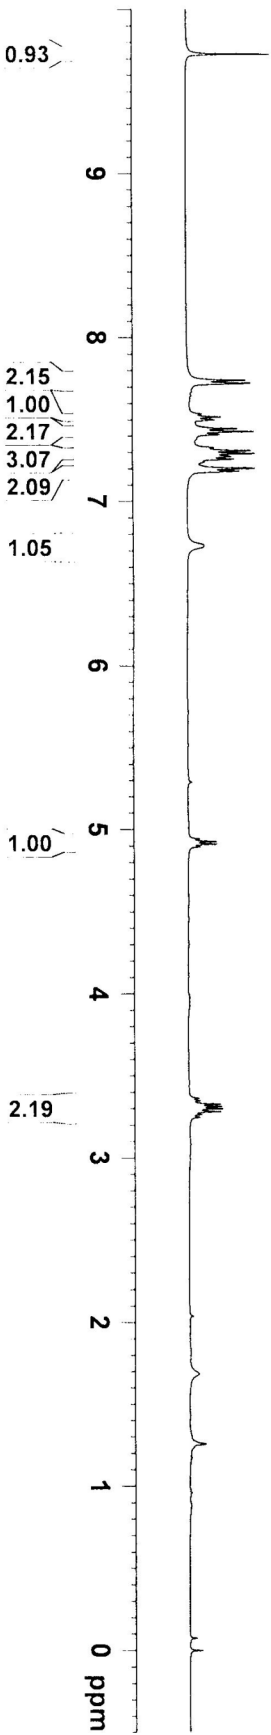

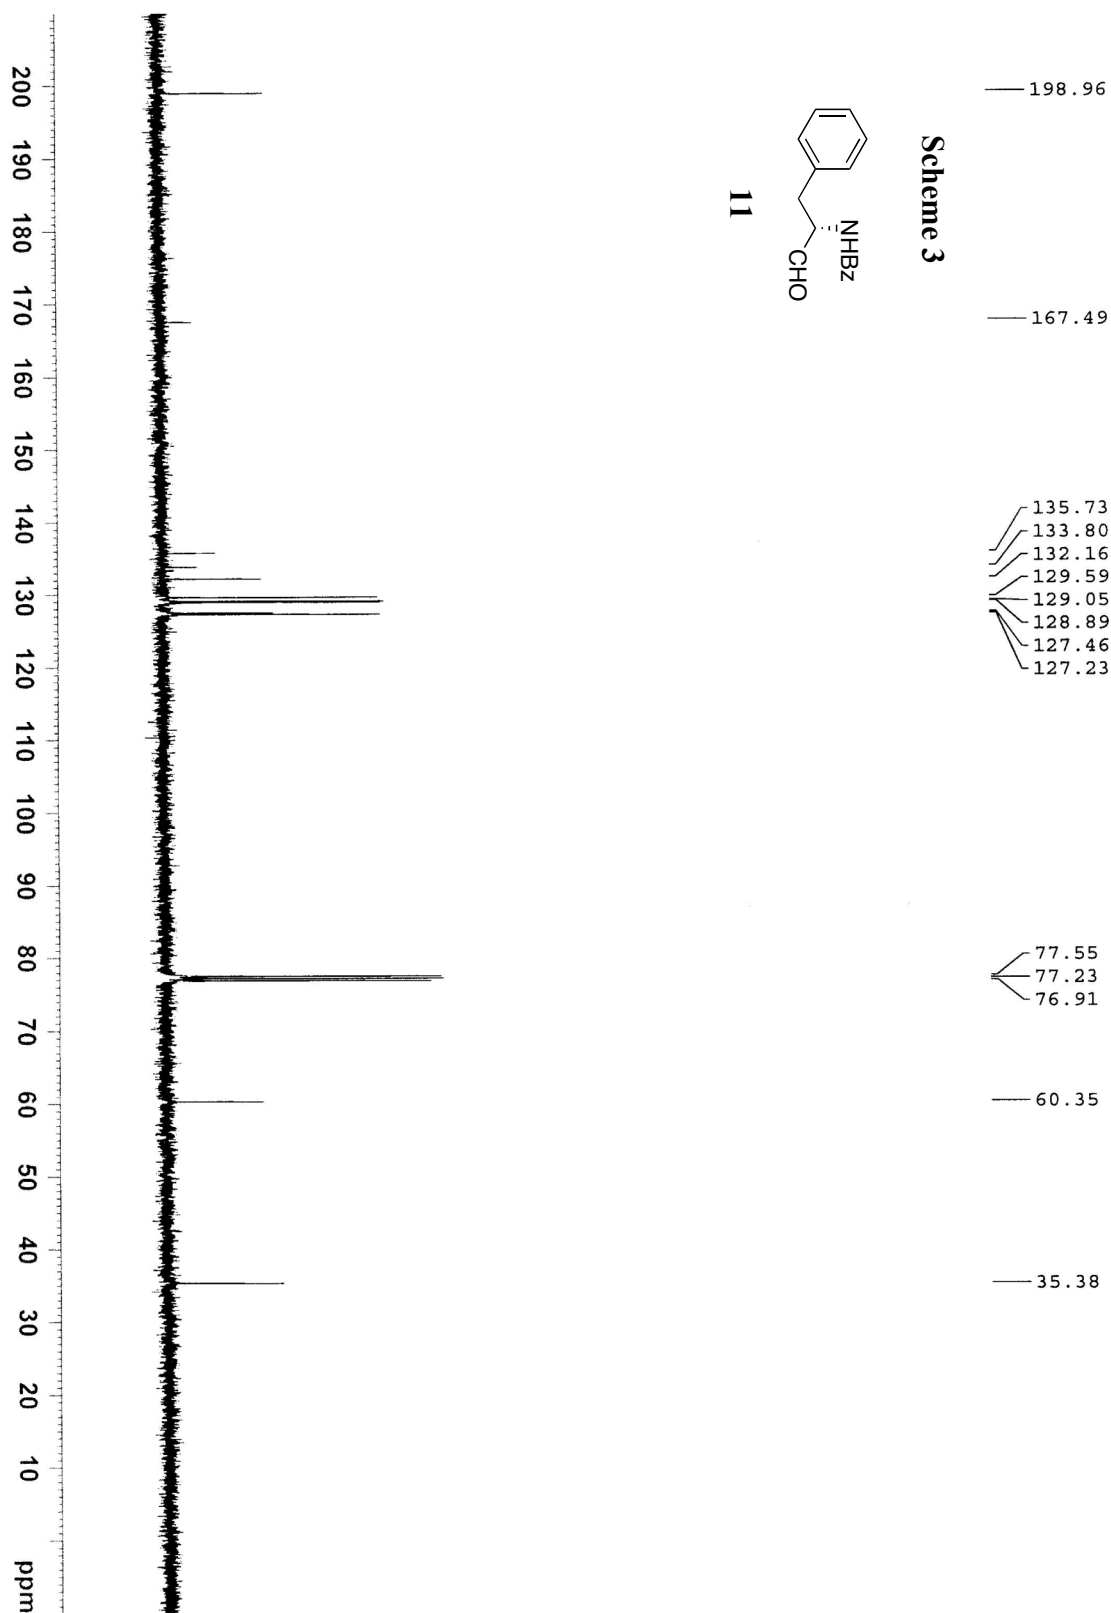

Scheme 3

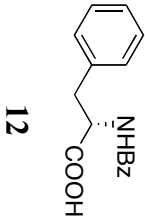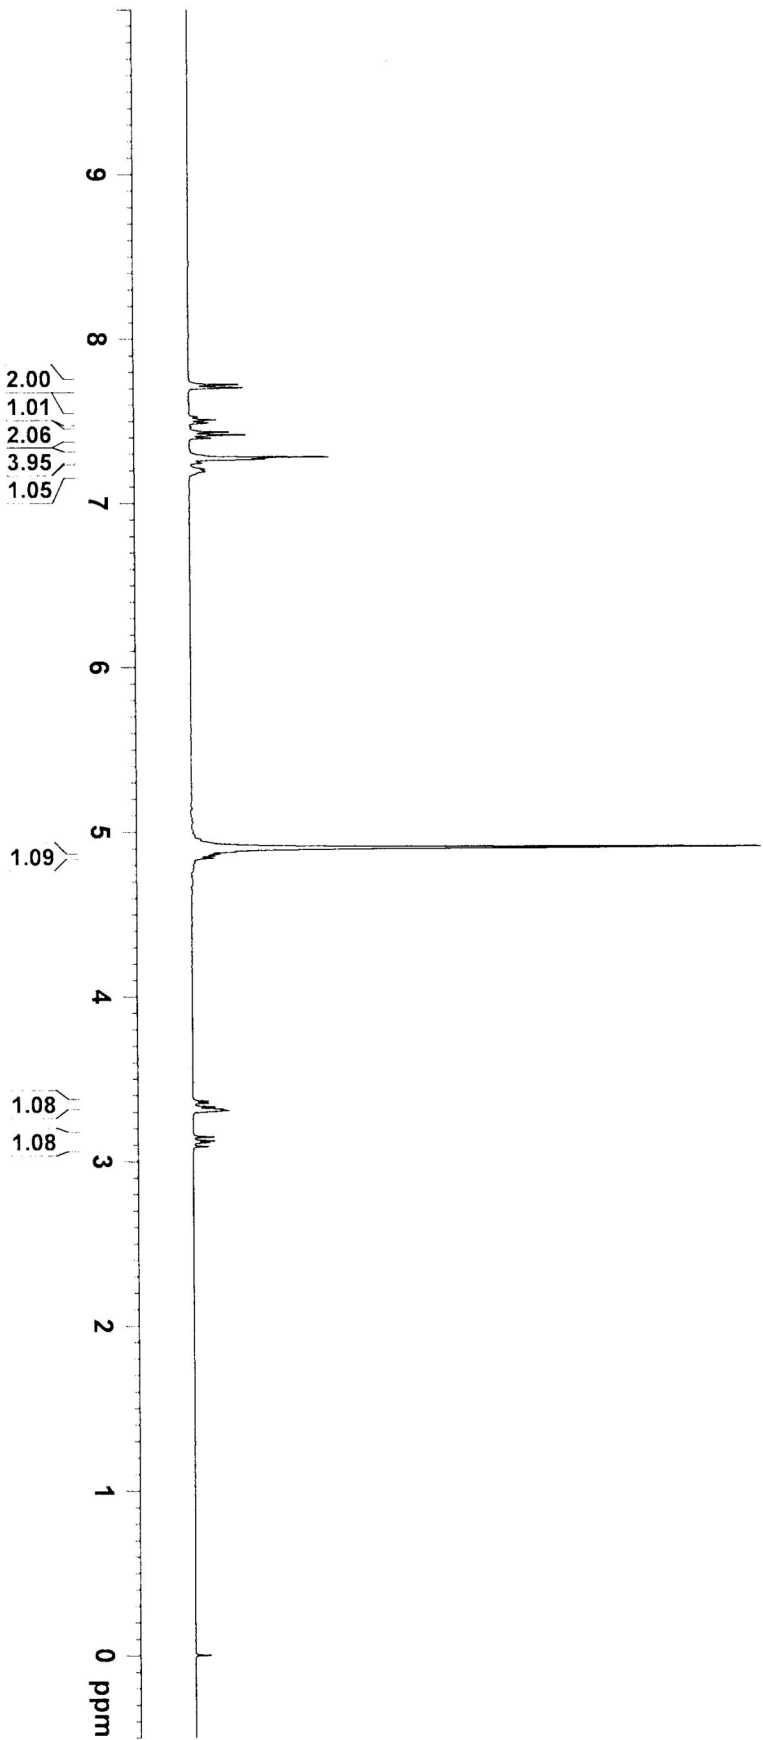

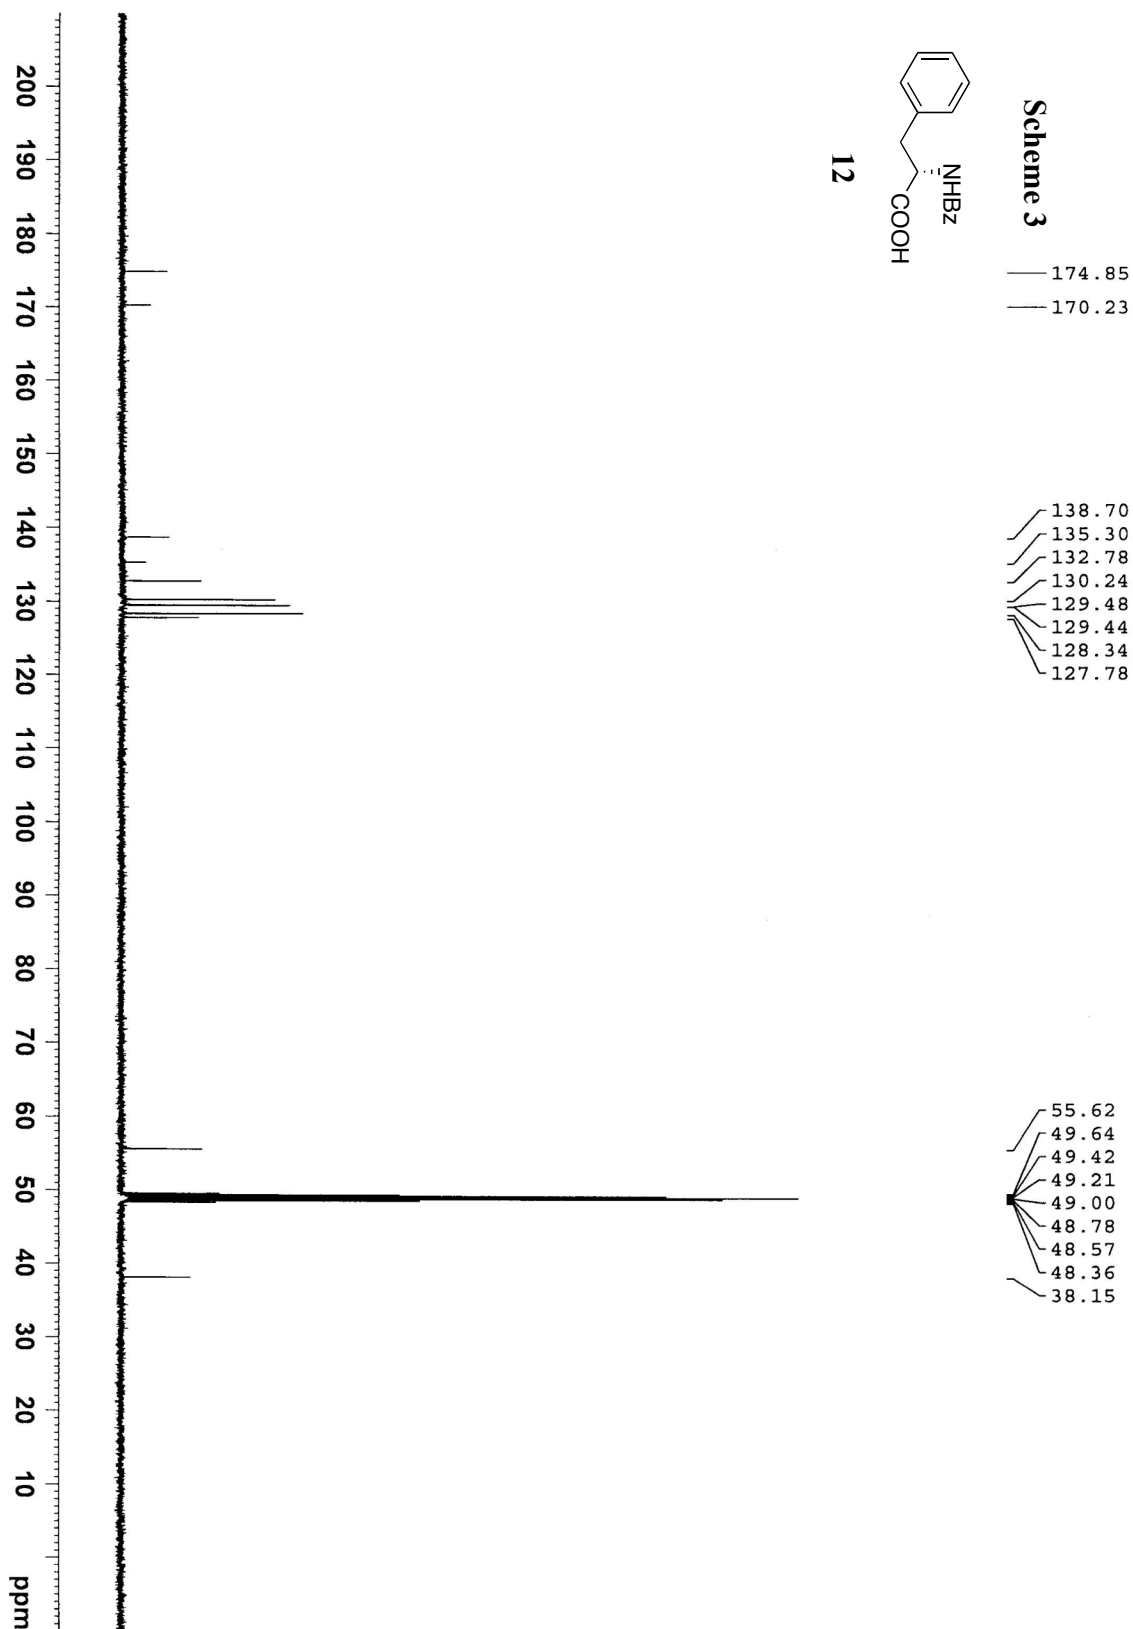

Scheme 3

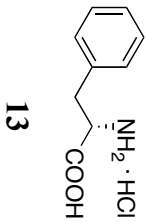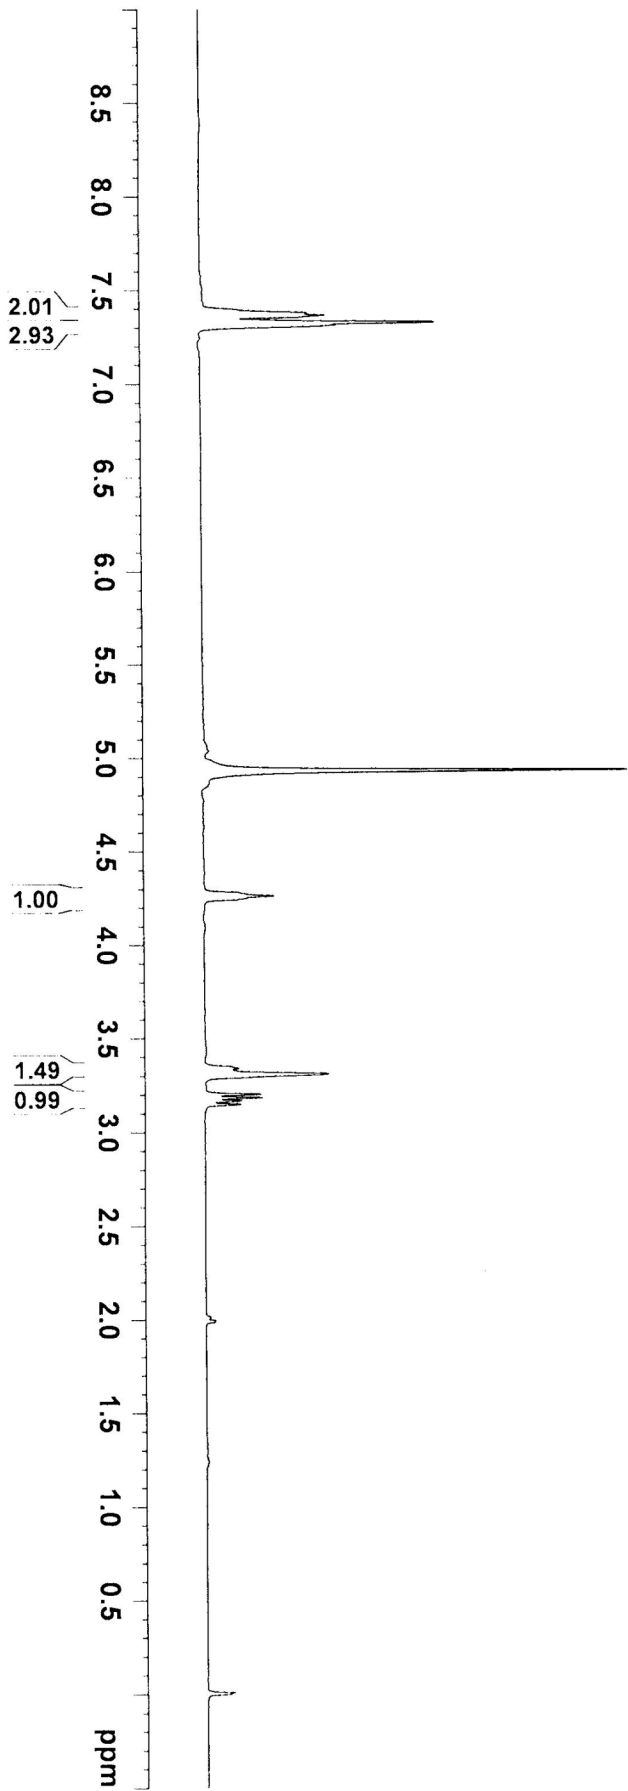

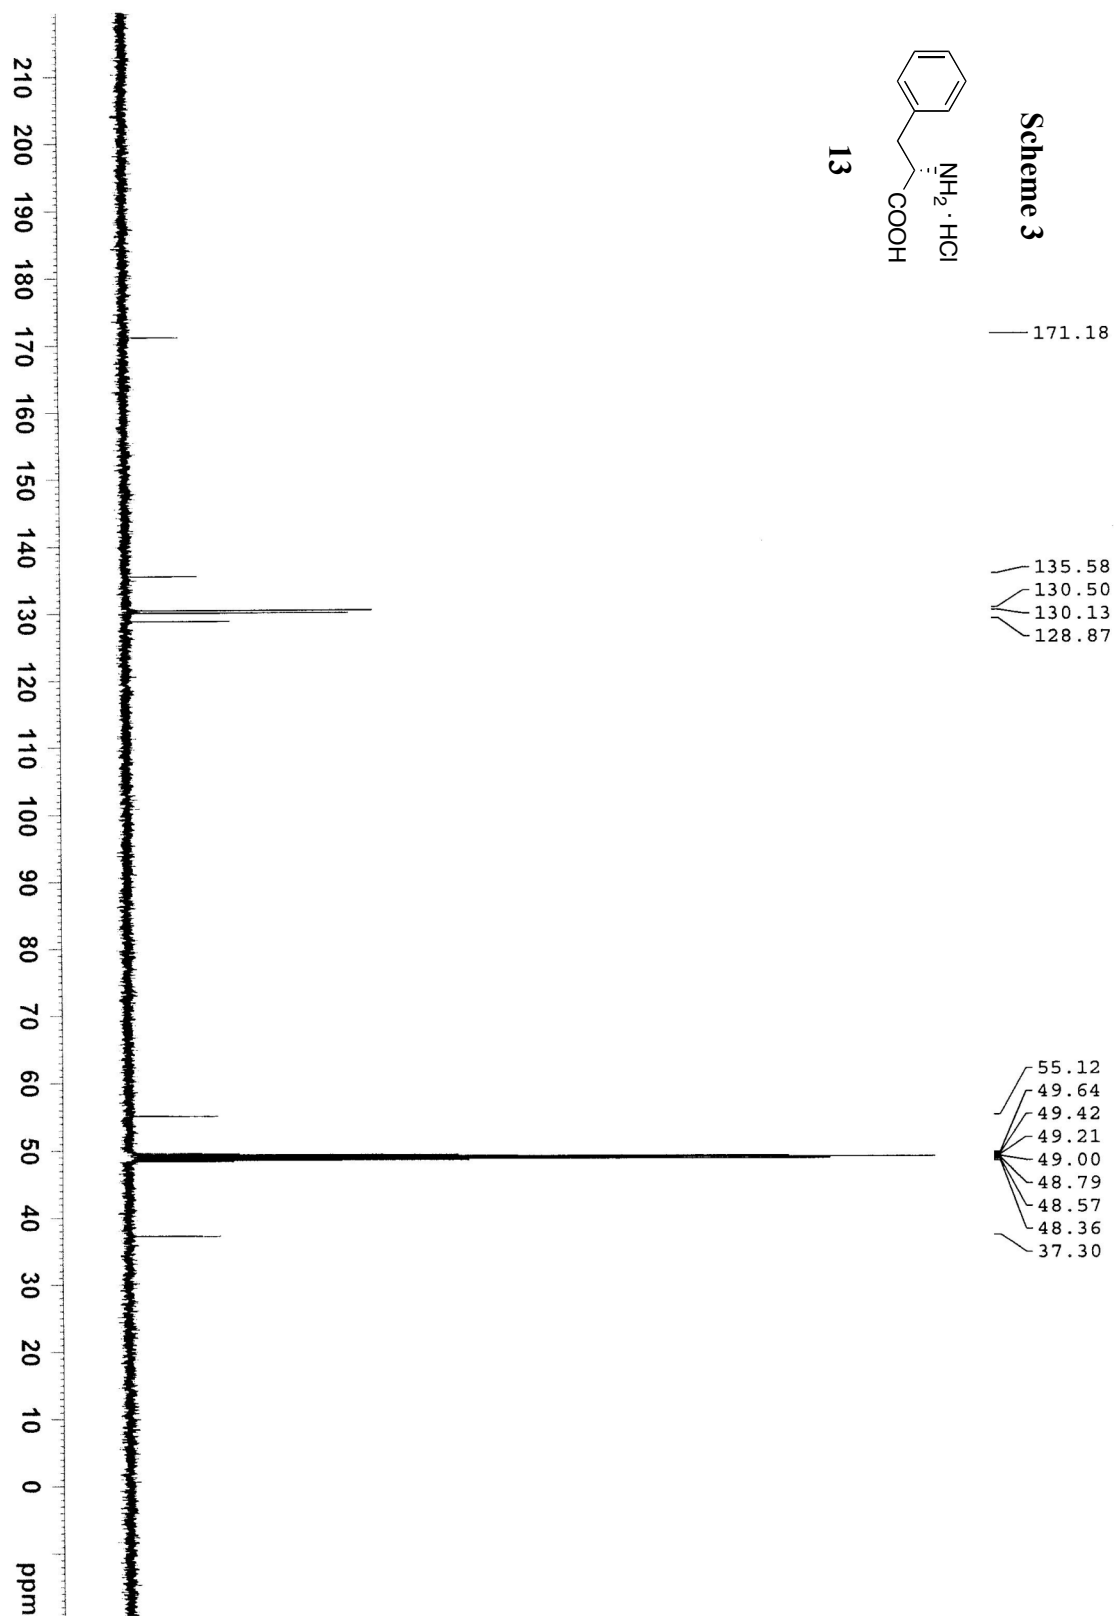

Supplement: c3ra42906g.pdf [file c3ra42906g.pdf]
